## Original Article

# A new classification of the family Ariidae (Osteichthyes: Ostariophysi: Siluriformes) based on combined analyses of morphological and molecular data

Alexandre Pires Marceniuk<sup>1,2,3,\*</sup> , Claudio Oliveira<sup>3</sup>, Carl J. Ferraris Jr<sup>4</sup>

<sup>1</sup>Programa de Pós-Graduação em Ciências Biológicas, Universidade Federal da Paraíba, conjunto Presidente Castelo Branco III, João Pessoa, PB 58050-000, Brazil

<sup>2</sup>Programa de Pós-Graduação em Ecologia e Conservação, Universidade Estadual da Paraíba, Campina Grande, PB 58429-500, Brazil

<sup>3</sup>Departamento de Biologia Estrutural e Funcional, Instituto de Biociências, Universidade Estadual Paulista Júlio de Mesquita Filho (UNESP), Botucatu, SP 18618-970, Brazil

<sup>4</sup>545 NE Floral Pl., Portland, OR 97232, USA

Zoobank registration: [urn:lsid:zoobank.org:pub:SD6C7EBF-E568-4100-9364-2DD357003878](https://zoobank.org/pub:SD6C7EBF-E568-4100-9364-2DD357003878).]

\*Corresponding author. Programa de Pós-Graduação em Ecologia e Conservação, Universidade Estadual da Paraíba, 58.429-500, Campina Grande, PB, Brazil.  
E-mail: [a\\_marceniuk@hotmail.com](mailto:a_marceniuk@hotmail.com)

## ABSTRACT

We present a new classification of the catfish family Ariidae based on a total-evidence hypothesis, which incorporates data from the examination of 249 morphological and 5603 molecular characters from 131 species. The named taxa in the proposed classification represent groups of species found in the Maximum Parsimony, Maximum Likelihood, and Bayesian Inference analyses or, in some cases, two of the three methods. Each named taxon is provided with a diagnosis derived from a comprehensive summary of the morphological characters and their character-state transformations, as interpreted from the most parsimonious version of the total-evidence tree. Taxa newly named herein are: Cathoropsini, new tribe; Genidentini, new tribe; Sciadeini, new tribe; *Acerioichthys*, new genus (type species *Arius dioctes* Kailola, 2000); *Blekeriella*, new genus (type species *Arius leptaspis* Bleeker, 1862); *Betancurichthys*, new genus (type species *Arius madagascariensis* Vaillant, 1894); *Jayaramichthys*, new genus (type species *Arius leptanotacanthus* Bleeker, 1849); *Kyataphisa*, new genus (type species *Pimelodus nenga* Hamilton, 1822); *Megalosciades*, new genus (type species *Arius augustus* Roberts, 1978); *Paracinetodus*, new genus (type species *Arius carinatus* Weber, 1913); *Papuaris*, new genus (type species *Arius latirostris* Macleay, 1883); and *Pseudosciades*, new genus (type species *Arius sona* Hamilton, 1822). A key to the genera of Ariidae is presented.

**Keywords:** biodiversity; catfish; systematics; taxonomy.

## INTRODUCTION

Catfish of the family Ariidae, with more than 130 species, are the only representatives of the order Siluriformes with a circumglobal distribution (Marceniuk and Menezes 2007). Representatives of the family are common especially in estuaries and coastal areas of the eastern Pacific and western Atlantic (New World), the eastern Atlantic (West Africa), and the Indo-Pacific (eastern Africa, Madagascar, Asia, Australia, and New Guinea) (Betancur-R 2009). Although predominantly estuarine or nearshore marine, the family also includes exclusively marine species found to 150 m deep, as well as species restricted to freshwater that have been found up to 500 km from river mouths (Marceniuk and Menezes

2007). The Ariidae are characterized by a specialized reproductive habit, wherein males incubate eggs and embryos in the oral cavity (Rimmer and Merrick 1983). The reproductive habits of the Ariidae are associated with their low dispersal capacity and high level of endemism, a condition addressed in studies that describe recent speciation processes related to vicariance events (allopatric speciation), or adaptation to environments with different selective pressure (parapatric speciation) (Betancur-R et al. 2010, Marceniuk et al. 2017a, 2019a). Ariidae are characterized by their large size, abundance, and good quality meat, representing an important component of industrial and subsistence fishing throughout their distribution (Betancur-R 2009).

Recognition of the family Ariidae has been widely acknowledged (e. g., Regan 1911, Sheldon 1937, Berg 1940, Tilak 1965, Greenwood *et al.* 1966, Chardon 1968) since the group was named by Bleeker (1862) as 'Phalanx Arii'. Its monophyly has been corroborated in a number phylogenetic and cladistic studies (Mo 1991, de Pinna 1993, Kailola 2004, Hardman 2005, Sullivan *et al.* 2006, Betancur-R 2009, Marceniuk *et al.* 2012). In contrast, the validity and species composition of many of the genera of the family have been remarkably unstable, making the Ariidae the family with the greatest taxonomic instability within the order Siluriformes (Ferraris 2007). In the 19th and 20th centuries, the great diversity and wide distribution of the Ariidae, as well as the morphological similarity between the species and their poor representation in zoological collections, were the biggest obstacles to carrying out comprehensive studies dealing with the systematic delimitation of the genera. Relatively subtle differences in external morphology required early taxonomists to use inconsistent morphological characters, such as the shape of dental plates (Günther 1864, Eigenmann and Eigenmann 1890, Jordan and Evermann 1896, 1898, Weber and De Beaufort 1913, Meek and Hildebrand 1923, Herre 1926, Jayaram and Dhanze 1978, Roberts 1978, Taylor and Menezes 1978, Taylor 1986, Kailola and Bussing 1995) as diagnostic characters at the generic level.

Over the past two decades, several efforts were undertaken to improve our understanding of the phylogenetic relationships of catfishes of the family Ariidae, and produce a classification of the family based on that phylogeny. The earliest of these efforts was a morphology-based study by Kailola (2004), which produced the first comprehensive classification of ariids since those proposed by Bleeker (1858) and Günther (1864). A new classification of the family was proposed by Marceniuk and Menezes (2007), based on a preliminary version of a morphological phylogenetic study later published by Betancur-R *et al.* (2007), Marceniuk *et al.* (2012) and Betancur-R (2009) produced phylogenetic hypotheses of the family based primarily on mitochondrial and nuclear sequence data, with a new classification of New World ariids proposed in Acero and Betancur-R (2007), Betancur-R *et al.* (2007) proposed the first subfamily-level classification of the Ariidae based on combined molecular and morphological evidence.

More recently generated phylogenetic hypotheses were often incongruent with respect to the higher-level relationships within the family (e. g., Betancur-R 2009, Marceniuk *et al.* 2012). The validity of some genera and their relationships were shared in the various analyses, but differed markedly in other aspects of the hypothesized relationships. That inconsistency resulted in markedly different classifications among various studies, which ill-served the readership. The objective of this study was to use all previously published morphological and molecular data in order to produce a classification of the Ariidae that best fits the available information and provides names for all uncovered monophyletic groups and, in some cases, groups that have been named previously and found herein to be clearly not polyphyletic.

### Materials and methods

The analysis of relationships within the Ariidae was based on the examination of 249 morphological and 5603 molecular characters

with 131 species in the ingroup (Supporting Information, Material S1) and five species in the outgroup. A total-evidence matrix was constructed with morphological characters described by Kailola (2004), Betancur-R *et al.* (2007), and Marceniuk *et al.* (2012), and DNA sequences (*cytochrome b*, ATP synthase 8/6, Rag1, Rag2, Myh6, 12S, and 16S) produced by Betancur-R and Acero (2004), Hardman (2002, 2005), Sullivan *et al.* (2006), Betancur-R *et al.* (2007), Betancur-R (2009), Betancur-R and Armbruster (2009), and Marceniuk *et al.* (2019b, c), all of which are available in GenBank ([www.ncbi.nlm.nih.gov/genbank/](http://www.ncbi.nlm.nih.gov/genbank/)). The final matrix was analysed by Maximum Parsimony, Bayesian Inference, and Maximum Likelihood methods. Morphological and molecular matrixes were concatenated into a single matrix with two sections. The 0–9 state model for standard, discrete morphological characters was used for the morphological data, assuming equal rates of character change (following Nylander *et al.* 2004). For molecular data, MEGA X (Kumar *et al.* 2018) was used to select the best model of nucleotide substitution for each gene and codon partition using the Akaike Information Criterion (Supporting Information, Material S2).

### Morphological data

The complete list of examined morphological characters is presented in the 'Character List' (Supporting Information, Material S3), where the number of the character from a source study is listed following our characters (e. g., our character 1 is character 15 of Kailola 2004, and character 1 in Marceniuk *et al.* 2012). The characters and their various character states are briefly summarized herein and more detailed descriptions, often with illustrations, can be found in the source publications. The character state assignment for each taxon is based primarily on the observations of one of us (A.P.M.). Specimens analysed and illustrated in this study belong to different fish collections and the acronyms are listed in Sabaj (2020).

Polarity for morphological character states was determined by outgroup comparison through the parsimony analysis as described in Nixon and Carpenter (1993). The rooting point was established in Diplomystidae, with other catfish families used for outgroup comparison being Anchariidae, Cetopsidae, Ictaluridae, and Pimelodidae (Fink and Fink 1981, Mo 1991, de Pinna 1993, Britto 2002). In cases of ambiguous optimizations, the alternative that maximized reversals rather than convergences was chosen, preserving as much as possible of the original hypotheses of primary homology (de Pinna 1991). Character state distributions were inferred based on Maximum Parsimony analysis. The majority consensus tree was examined through accelerated transformation optimization using WinClada 1.00.08 (Nixon 2002).

### Maximum parsimony

Maximum Parsimony (MP) analysis was applied using TNT (Goloboff *et al.* 2008). Morphological data reversals and convergences were considered as equally possible (Swofford and Maddison 1987). Multistate characters were analysed as unordered inasmuch as the practice of ordering multistate characters is inappropriate if congruence with other characters is being examined (Hauser and Presch 1991). The data matrix was assembled with the aid of Mesquite (Maddison and Maddison 2007). 'Missing' was applied in the description of the characters

for the terminals in which the character states are not observed because of the poor condition of the material or doubtful cases of polymorphism, and 'not applicable' was used when the terminals in question do not have the structure described in the corresponding character. Despite claims of Nixon and Davis (1991), the interpretations obtained herein, using different computer programs, were considered equivalent and treated as 'missing data'. Thus, 'missing' and 'not applicable' data are coded as dashes ('-') in the analysed data matrix.

In TNT, a traditional heuristic search was initially performed using the stepwise addition algorithm associated with tree bisection-reconnection (TBR) in a total amount of 10 000 samples, each one loading sectorial searches, 10 ratchet interactions, and 10 tree-drift interactions. After all replicates, 10 tree-fuse interactions were performed. A final round of TBR with all resulting trees was performed. The different topologies found in the fundamental cladograms were summarized in a strict consensus tree.

### Maximum Likelihood and Bayesian Inference

The Maximum Likelihood (ML) and Bayesian Inference (BI) analyses were run using morphological data and concatenated molecular sequences. ML analyses were conducted in RAxML (Stamatakis 2006), including all best-fit models for molecular data as detailed in Supplementary Material II. The trees were constructed using the rapid bootstrap algorithm, with node support being estimated by 1000 nonparametric bootstrap replicates (Felsenstein 1985). BI was run in MrBayes v.3.2.7 (Ronquist *et al.* 2012) including all best-fit models as detailed in Supplementary Information S2. Four independent runs were conducted, each with four Markov chains run for  $3 \times 10^8$  generations. The Bayesian tree was constructed based on a majority rule consensus analysis with random initial trees, which were sampled every 100 000 generations. Conservatively, 25% of the first trees sampled in each MCMC run were discarded as burn-in. The log-likelihood scores were examined in Tracer v.1.6 (Rambaut *et al.* 2014) to assess convergence among runs and run performance. The post-burn-in samples were used to construct a consensus tree. Phylogenetic analyses were performed on the Cipres Science Gateway webserver (Miller *et al.* 2010) and the final tree was edited in FigTree v.1.3.1 (<http://tree.bio.ed.ac.uk/software/figtree>).

### Morphological diagnoses

In the diagnoses of named taxa, character states with unambiguous optimizations are presented first, followed by those with ambiguous optimization. Following the character state description is the character number and its transformation. As the derived condition was sometimes not found in some terminals of the branch, reversals to the plesiomorphic condition or acquisition of the different condition within the clade are mentioned. Transformations in bold type represent autapomorphies. Diagnoses distinguish taxa from the remaining named taxa of the immediate more-inclusive taxon.

Within each taxon account, the list of included taxa represents those that are considered valid herein. The originally proposed name of the listed taxa, synonyms (if any), and relevant nomenclatural details (type locality, primary type(s), and details of

the publication that made the name available) can be found in Marceniuk and Menezes (2007) or one of the more recent publications cited in the introduction (Betancur-R 2009, Marceniuk *et al.* 2012). Asterisks (\*) that follow names of valid species indicate species that were not included in the phylogenetic analyses.

Recognizable groups of species that are not treated here as named taxa are diagnosed in the remarks section of their more inclusive named taxon. The method of presentation of unambiguous and ambiguous character states is the same as that for named taxa.

## RESULTS

### Phylogenetic reconstruction

MP analysis yielded 695 equally parsimonious trees with 13 271 steps, a consistency index of 23, and a retention index of 64 (Fig. 1). ML (Fig. 2) and BI (Fig. 3) analyses resulted in well supported trees with mostly concordant groups. In those cases where conflicts among different methods were observed we follow as rule: (1) recognize the monophyletic groups when they were found in two analyses; (2) consider the taxon as *incertae sedis* in cases where conflicts in all analyses were observed. These criteria preserve as much as possible previous classifications and taxa with strong morphological support. The ranks tribe and subtribe were recognized to express monophyly and biogeography, seeking to follow biogeographic precepts established in Betancur-R (2009).

In the new classification of the Ariidae, three subfamilies, four tribes, two subtribes, and 43 genera are recognized. Additionally, eight genera are recognized for the first time and four others recognized as having an *incertae sedis* relationship within the broader taxa. For each taxon a parenthetical annotation is presented summarizing the support indexes for the branch.

## NEW CLASSIFICATION OF THE ARIIDAE

### Family Ariidae Bleeker, 1858

MP 100, BI 1, ML 100

Type genus: *Arius* Valenciennes, 1840.

#### Included subfamilies

Ariinae Bleeker 1858

Bagreinae Schultz, 1944

Galeichthyinae Acero & Betancur-R, 2007.

#### Diagnosis (all non-ambiguous)

Contact face between lateral ethmoid and frontal through two facets that delimit a fenestra (**14, 2 > 3**), state 0 in *Ketengus*; bony blade anteriorly connecting nasal tubules present (**21, 0 > 1**), reversed in *Osteogeneiosus*; posterior cranial fontanel formed exclusively frontals (25, 0 > 1), reversed in *Arius*, *Aspistor*, *Betancurichthys*, *Cathorops dasycephalus*, *Cephalocassis*, *Cinetodus*, *Cryptarius*, *Doiichthys*, *Hemiarius*, *Hemipimelodus*, *Ketengus*, *Nedystoma*, *Nemapteryx*, *Neoarius* (except *Neoarius hainesi*), *Notarius*, *Pachyula*, *Paracinetodus*, *Pauparius*, and *Potamosilurus*; epioccipital posterior process present (**42, 0 > 1**); accessory tooth plates present (58, 0 > 1), reversed in *Hemipimelodus*,



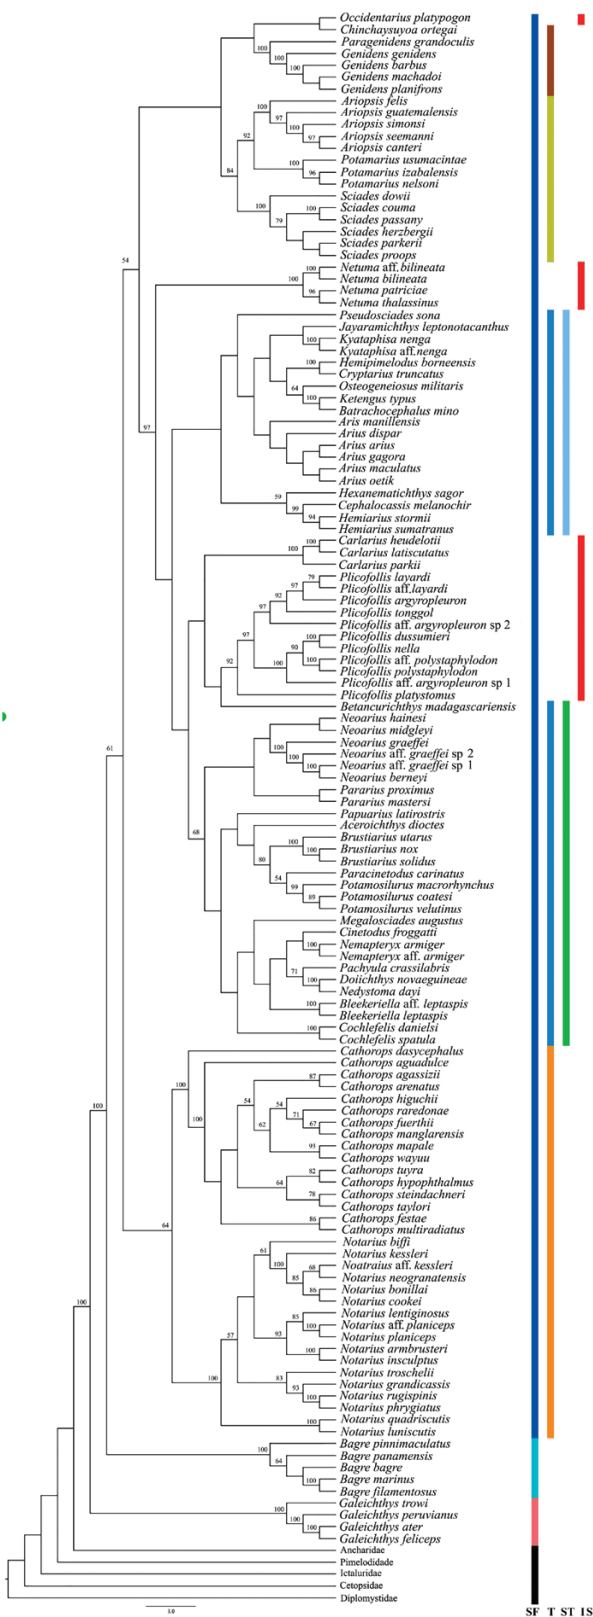

**Figure 1.** MP analysis. Subfamilies (SF) Galeichthyinae (pink), Bagreinae (bright blue), and Ariinae (dark blue). Tribe (T) Ariini (blue), Cathopsini (orange), **Genidentini tribe nov.** (brown), and **Sciadeini tribe nov.** (light green). Subtribe (ST) Ariina (light blue) and Doiichthyina (green). *Incertae sedis* taxa (IS) (red). Numbers over branches correspond to the bootstrap support.

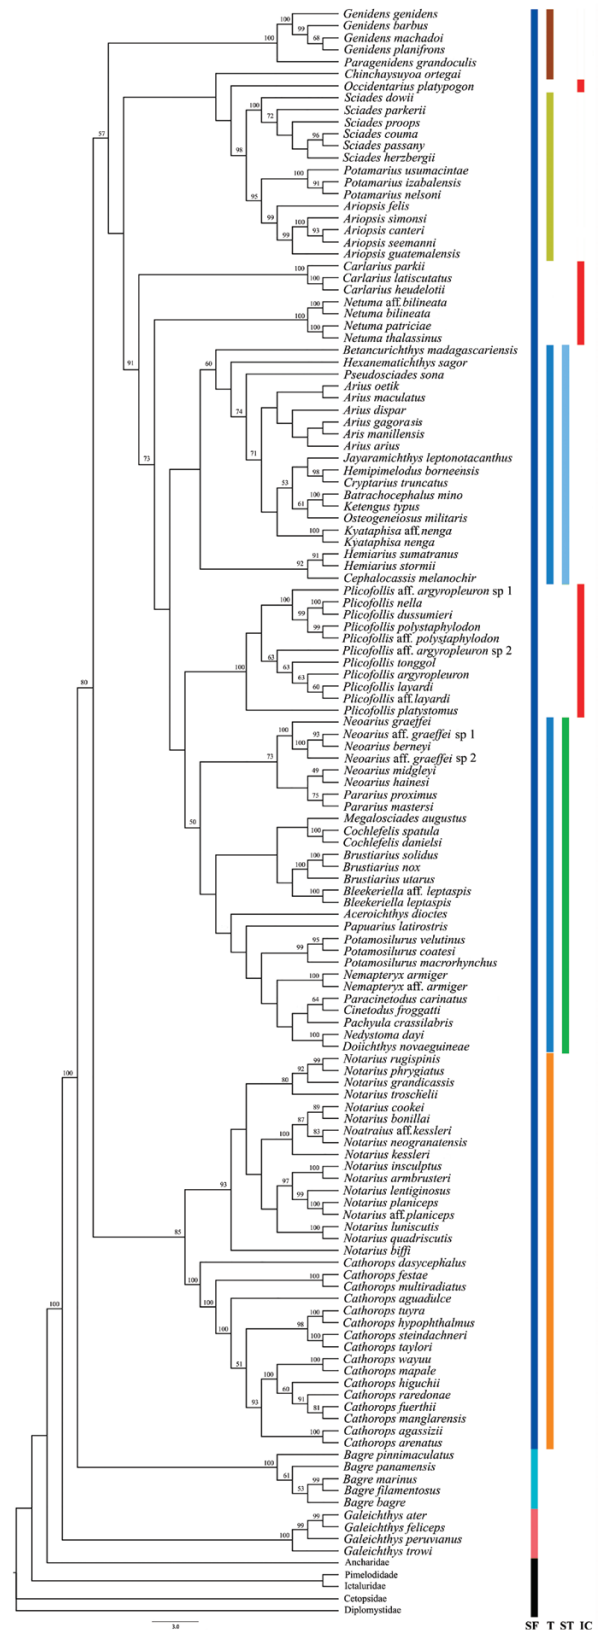

**Figure 2.** ML analysis. Subfamilies (SF) Galeichthyinae (pink), Bagreinae (bright blue), and Ariinae (dark blue). Tribe (T) Ariini (blue), Cathopsini (orange), **Genidentini tribe nov.** (brown), and **Sciadeini tribe nov.** (light green). Subtribe (ST) Ariina (light blue) and Doiichthyina (green). *Incertae sedis* taxa (IS) (red). Numbers over branches correspond to the bootstrap support.



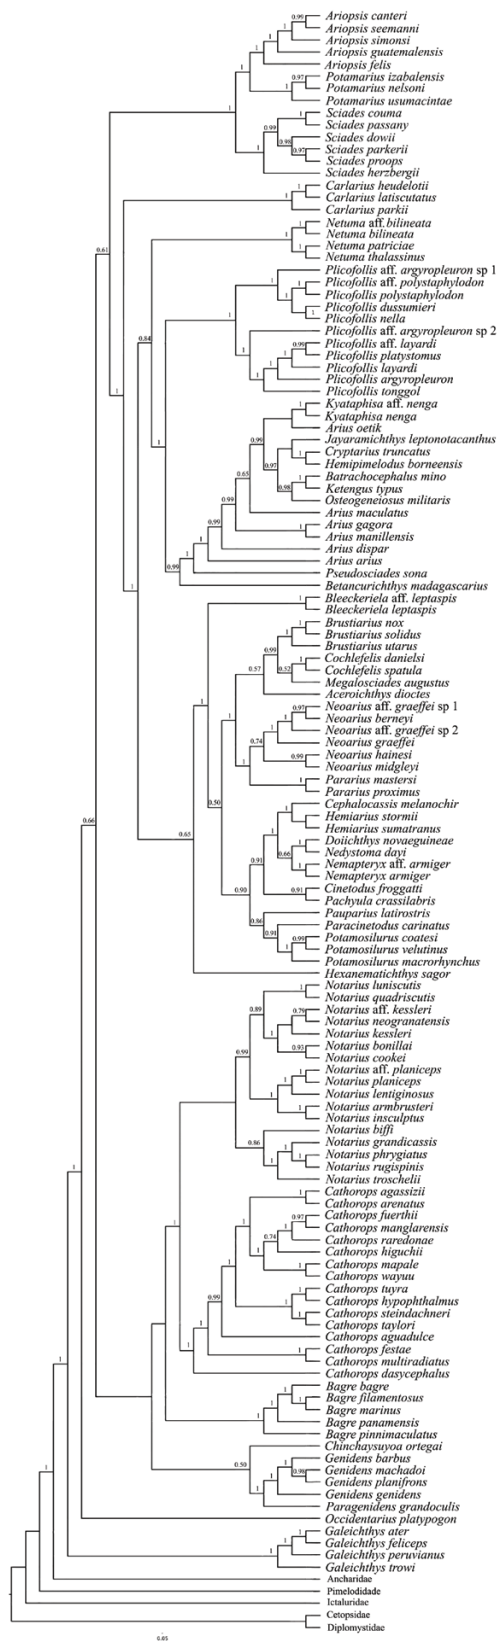

**Figure 3.** BI analysis. Subfamilies (SF) Galeichthyinae (pink), Bagreinae (bright blue), and Ariinae (dark blue). Tribe (T) Ariini (blue), Cathopsini (orange), **Genidentini tribe nov.** (brown), and **Sciadeini tribe nov.** (light green). Subtribe (ST) Ariina (light blue) and Doichthyina (green). *Incertae sedis* taxa (IS) (red). Numbers over branches correspond to the bootstrap support.

*Ketengus*, *Nedystoma*, *Pachyula*, *Potamarius* (except *Potamarius usumacintae*), and *Potamosilurus*; otic capsule very large, limited by prootic, pterotic, and exoccipital ( $70, 0 > 2$ ), state 1 in *Sciades* (except *Sciades couma* and *Sciades herzbergii*); lapilli otoliths several times larger than asteriscus and sagitta ( $75, 0 > 1$ ); space between transcapular process and otic capsule moderately large ( $89, 0 > 1$ ), reversed in *Chinchaysuyoa*, *Occidentarius*, *Sciades* (except *Sciades couma* and *Sciades herzbergii*); posterior process of exoccipital present ( $90, 0 > 1$ ), reversed in *Notarius*; posterior infraorbital S-shaped ( $97, 0 > 1$ ), state 2 in *Bagre*; lachrymal-antorbital very wide ( $100, 1 > 0$ ), reversed in *Plicofollis dussumieri*, *Plicofollis layardi*, *Plicofollis nella*, and *Plicofollis polystaphylodon*; dorsal crest of premaxilla present ( $125, 1 > 0$ ), reversed in *Ketengus*; anterior portion of second basibranchial very expanded ( $165, 0 > 1$ ); anterior portion of proximal cartilage of fourth epibranchial about half as wide as posterior portion ( $188, 0 > 1$ ); third pharyngobranchial angled in form of boomerang ( $192, 0 > 1$ ), reversed in *Doichthys*, *Ketengus*, and *Paragenidens*; dorsal processes of upper (pharyngeal) tooth plate long ( $197, 0 > 1$ ), reversed in *Cinetodus* and state 2 in *Doichthys* and *Nedystoma*; anterior and posterior nostrils close together ( $232, 0 > 1$ ).

### Remarks

Within the Ariidae, the subfamilies Ariinae and Bagreinae share a suite of molecular and morphological characters not found in the species of the Galeichthyinae. The MP and ML results place the Ariinae plus Bagreinae as the sister group to the Galeichthyinae (Figs 1–2). Morphological character states that are shared by those two subfamilies and absent in Galeichthyinae are as follows: anterior portion of anterior cranial fontanel partially or totally delimited by dorsal expansion of orbitosphenoid ( $24, 0 > 1$ ); enclosure of aortic canal present ( $76, 0 > 1$ ); subvertebral process well developed ( $78, 0 > 1$ ); basioccipital lateral process present ( $82, 0 > 1$ ); sesamoid bone I very long and subtriangular ( $145, 0 > 1$ ); urohyal long  $157 (0 > 1)$ ; posterolateral processes of urohyal short ( $160, 0 > 1$ ); posterolateral processes of urohyal as long as or longer than distal portion of bone ( $162, 0 > 1$ ); distal portion of uncinat process of third epibranchial truncate ( $183, 0 > 1$ ); mesial one-fourth of fourth epibranchial thin, its width about twice its length ( $186, 0 > 1$ ), superficial ventral ossification of Weberian apparatus entirely covering aortic canal ( $209, 0 > 1$ ); 19 or more precaudal vertebrae ( $215, 0 > 1$ ); and protractor muscle of parapophysis of fourth vertebra contacting posterior process of epioccipital ( $249, 0 > 1$ ).

**Ambiguous optimization:** Mesethmoid median portion moderately wide ( $2, 1 > 2$ ); epioccipital posterior process very long ( $43, 0 > 1$ ); orbitosphenoid and pterosphonoid lateral expansions very narrow and long ( $65, 0 > 1$ ); otolith anteromesial process conspicuous ( $72, 0 > 1$ ); contact face for articulation of transcapular process with basioccipital large and depressed ( $85, 0 > 1$ ); exoccipital bony crest parallel to vertebral column and mesially folded ( $92, 1 > 2$ ); articulation of the autopalatine with lateral ethmoid slightly displaced to anterior portion of bone ( $111, 1 > 0$ ); dorsal crest of urohyal not projected anteriorly ( $156, 1 > 0$ ); Müllerian ramus distal third gently curved ( $208, 0 > 1$ ); 15 or more ribs ( $213, 0 > 1$ ); adipose-fin base very short ( $222, 0 > 3$ ); gas bladder shape cordiform ( $239, 0 > 1$ ), and lateral line not bifurcated, reaching dorsal caudal-fin lobe ( $247, 0 > 1$ ).

## Key to subfamilies, tribes, subtribes, and genera of Ariidae

- 1a. Bones forming cephalic shield smooth or grooved; shape of vomerine tooth plates transversely elongate .....2
- 1b. Bones forming cephalic shield granulated; shape of vomerine tooth plates absent or not elongate ... .Ariinae .....3
- 2a. Posterior process of cleithrum connected by bony blade to second dorsal process of cleithrum; adipose-fin base longer than anal-fin base; maxillary barbel cylindrical; two pairs of mental barbels ..... Galeichthyinae (genus *Galeichthys*)
- 2b. Posterior process of cleithrum free from second dorsal process of cleithrum; adipose-fin base shorter than one-half length of anal-fin base; maxillary barbel compressed; one pair of mental barbels ..... Bagreinae (genus *Bagre*)
- 3a. New World genera of Ariinae ..... 4
- 3b. Old World genera and Subtribes of Ariini ..... 12

## Subfamily Galeichthyinae Acero &amp; Betancur-R., 2007

(Figs 1–3)

Type genus: *Galeichthys Valenciennes*, 1840.

## Diagnosis (all of ambiguous optimization)

Frontal mesial laminar projection absent (23, 1 > 0); parieto-supraoccipital process base almost as narrow as posterior portion (46, 1 > 0); ventral crest of parieto-supraoccipital process weakly developed, restricted to base of process (48, 1 > 0); anterior margin of otolith irregular, concave (71, ? > 2); transcapular process forming a right angle in relation to body axis (86, 0 > 1); transcapular process very short and thick (87, 0 > 1); bony crest of exoccipital shallow and inconspicuous (91, 0 > 1); posterior branch of lachrymal-antorbital short and little differentiated (99, 1 > 0); maxilla wide for proximal two-thirds with edges parallel, narrow distally, thin and acute posteriorly (102, 0 > 1); autopalatine posterior cartilage as long as anterior cartilage (114, 1 > 0); anterodorsal process of anguloarticular present (118, 0 > 1); opercle posterior portion not well developed posteriorly (129, 1 > 0); second external branchiostegal ray almost as wide as first ray (148, 0 > 1); posterior portion of second basibranchial long and wide (167, 2 > 0); third basibranchial long and narrow (169, 1 > 2); mesial portion of first epibranchial large and depressed (180, 0 > 1); space for insertion of teeth on fifth ceratobranchial very large (194, 1 > 0); median crest associated with neural spine of third vertebra low or absent (201, 1 > 0); seventh vertebra free from ventral superficial ossification (214, 0 > 10); anterior and middle nuchal plates indistinct (217, 1 > 0); posterior process of cleithrum connected by bony blade from second dorsal process of cleithrum (228, 0 > 1); basiptyergium anterior internal process partially connected to bony lamina (231, 0 > 1); gas bladder Müllerian window short (241, 0 > 1).

## Included genera

*Galeichthys* Valenciennes, 1840.

## Remarks

The total-evidence analysis corroborates previous morphological and molecular studies and confirms the recognition of a subfamily for the genus *Galeichthys*, as the sister group of all other members of the family Ariidae (Betancur-R. 2009, Marceniuk *et al.* 2012).

*Galeichthys* Valenciennes, 1840

MP 100, BI 1, ML 100

(Figs 1–3, 4A–5)

Type species: *Galeichthys feliceps* Valenciennes, 1840.

## Diagnosis

That of the Galeichthyinae, above.

## Included species

*Galeichthys ater* Castelnau, 1861  
*Galeichthys feliceps* Valenciennes, 1840  
*Galeichthys peruvianus* Lütken, 1874  
*Galeichthys trowi* Kulonowski, 2010 \*.

## Remarks

Total-evidence analysis corroborated previous morphological (Marceniuk and Menezes 2007, Marceniuk *et al.* 2012) and molecular (Betancur-R. 2009) studies regarding the monophyly and relationship of the genus. Supported by morphological and molecular data, Betancur-R. *et al.* (2007) had the same interpretation of the phylogenetic relationship of *Galeichthys*, examining only *Galeichthys ater* and *Galeichthys peruvianus*, whereas Kailola (2004), based only on morphological evidence, recognized the same species composition, but with a unique hypothesis of phylogenetic relationships.

*Habitat and distribution:* Marine, southern Africa, and north-western coast of South America (Fig. 4).

## Subfamily Bagreinae Schultz, 1944

(Figs 1–2)

Type genus: *Bagre* Cloquet, 1816.

## Included genera

*Bagre* Cloquet, 1816.

## Diagnosis

Posterior branches of mesethmoid moderately long, delimiting between one-fourth and one-half length of anterior cranial fontanel (8, 0 > 1); lachrymal-antorbital and frontal distinct from each other (22, 0 > 1); ventral tip of subvertebral process

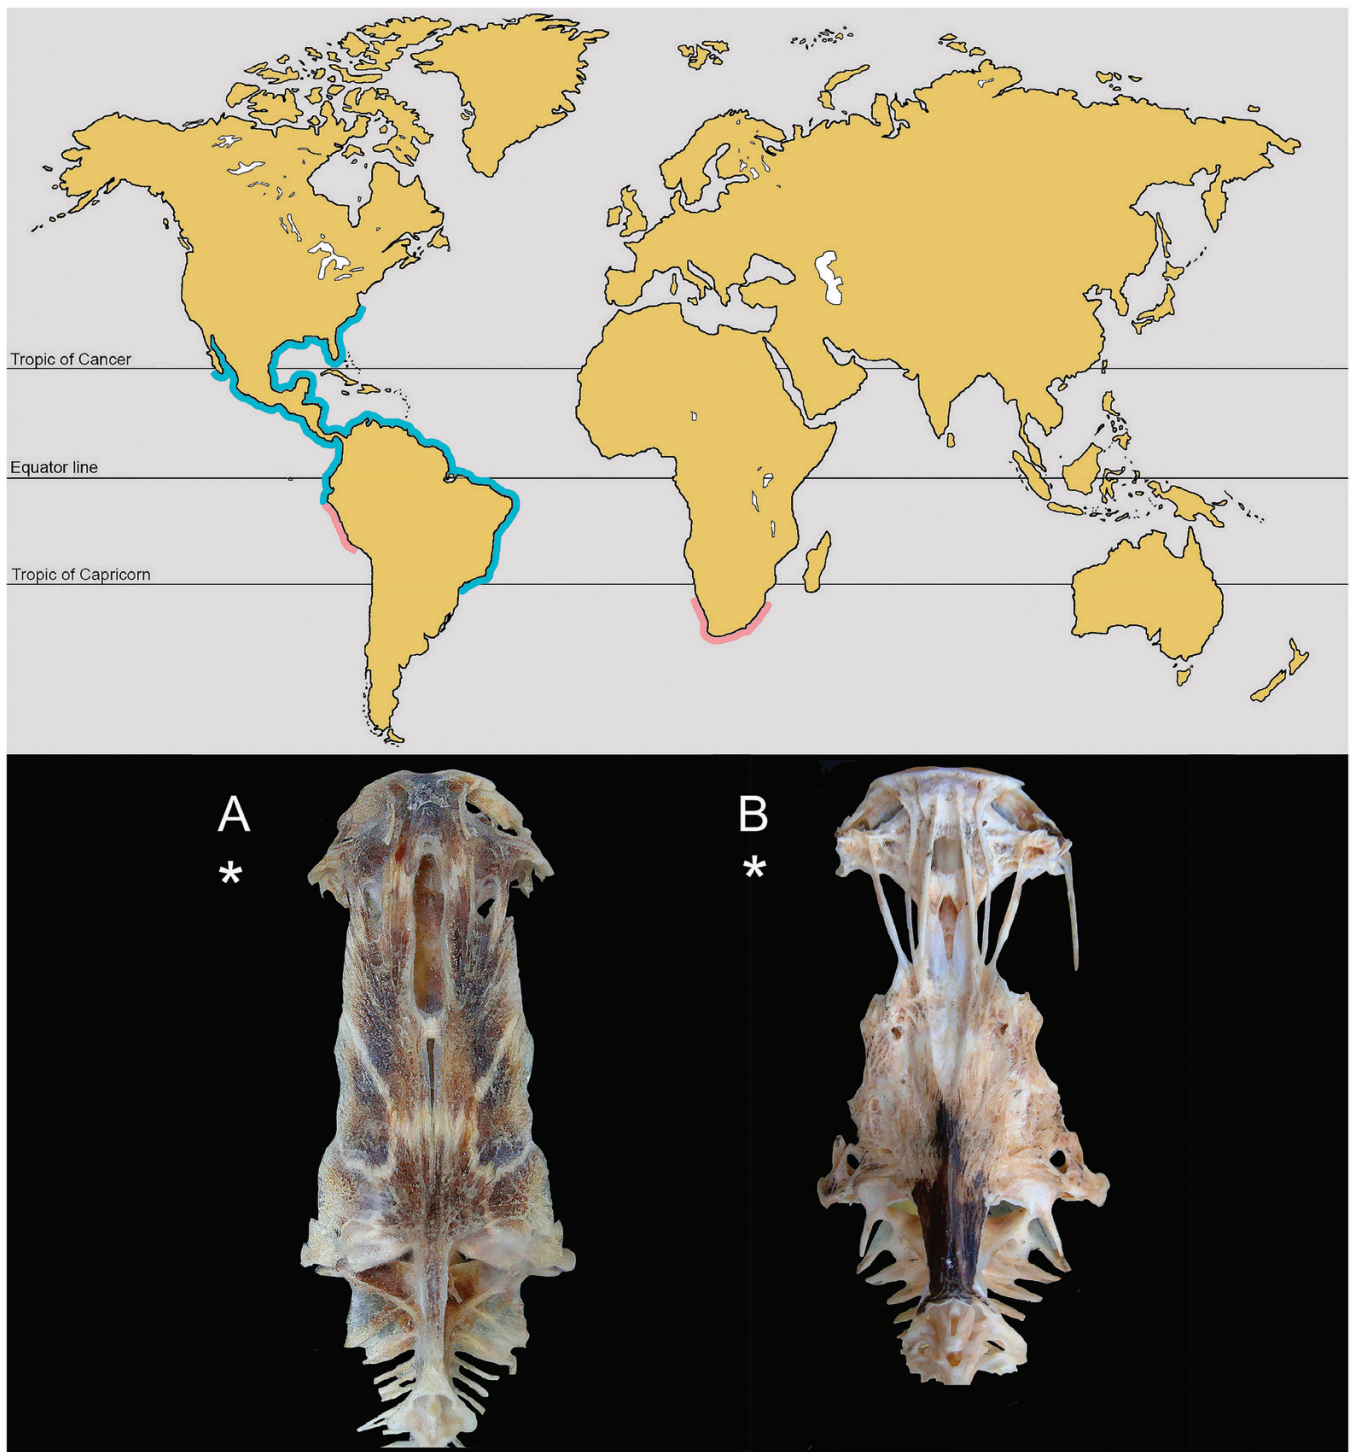

**Figure 4.** Representative skulls, in dorsal view, and distribution of the subfamilies Galeichthyinae (pink) and Bagreinae (light blue). A, *Galeichthys peruvianus*, MZUSP 94844. B, *Bagre bagre*, MPEG 32804. \* marine.

rounded (80, 0 > 1); anterior infraorbital conspicuously curved (96, 0 > 1); posterior infraorbital L-shaped (97, 1 > 2); two anterior branches and one mesial branch in lachrymal-antorbital anterior part (98, 0 > 2); maxilla cylindrical, moderately long and distally acute (101, 0 > 1); maxillary condyle large (103, 1 > 2); autopalatine conical, short, and robust (104, 0 > 1); autopalatine ventral process present and very conspicuous (112, 0 > 1); dorsal crest of premaxilla delimiting contact area with

mesethmoid beginning between lateral one-third or one-half of anterior margin (124, 0 > 1); metapterygoid anterior process very large (139, 0 > 1); posterior ceratohyal long (153, 0 > 1); posterior end of urohyal bifurcate (158, 0 > 1); median constriction of third basibranchial displaced to posterior one-fourth (170, 0 > 1); transverse crest associated with neural spine of fourth vertebra very high (200, 0 > 1); median crest associated with neural spine of fourth vertebra very high (202,



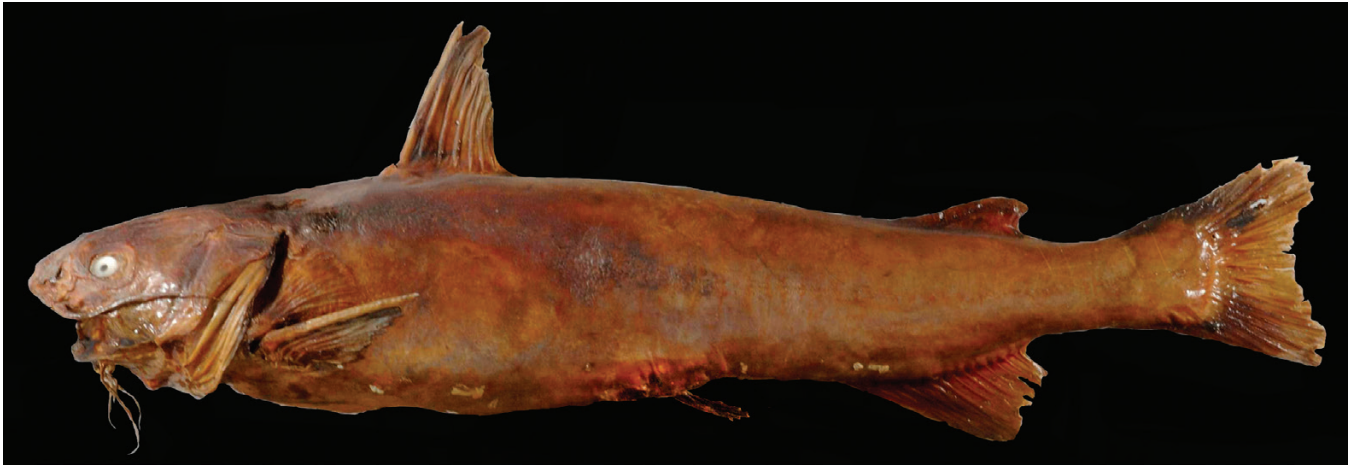

Figure 5. *Galeichthys feliceps*, syntype MNHN A-9363, south-eastern Atlantic and south-western Indian Ocean, type species of the genus.

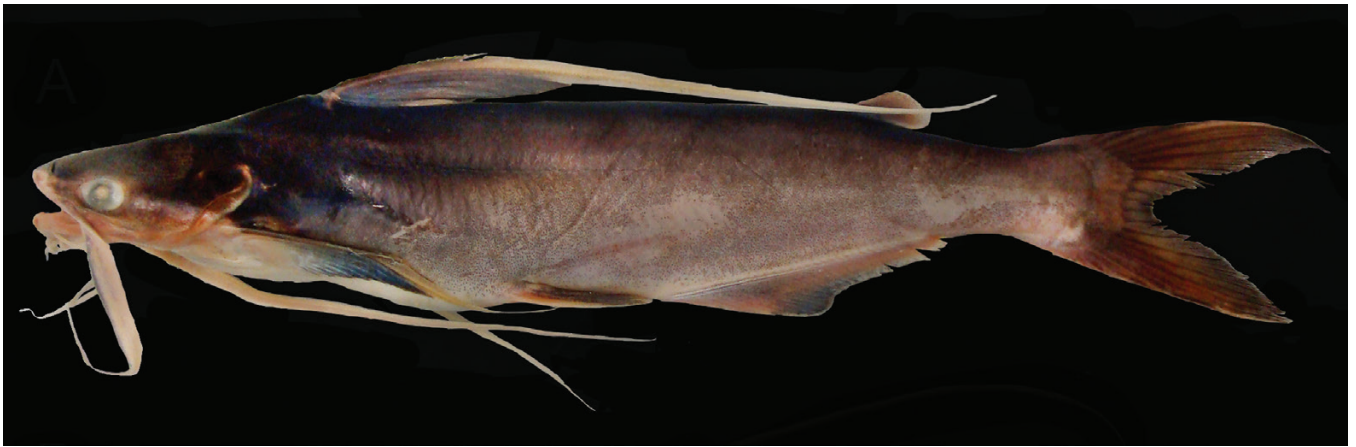

Figure 6. *Bagre bagre*, LBP 30215, western Atlantic, type species of the genus.

0 > 1); Müllerian ramus blade evident only in basal third of length (206, 2 > 1); 39 or more caudal vertebrae (216, 1 > 0); adipose-fin origin vertically above posterior one-half of anal fin (223, 1 > 2); second dorsal cleithral process on lower portion of cleithrum (225, 0 > 1); maxillary barbel compressed (235, 0 > 1); mental barbel one pair (237, 0 > 1); gas bladder lateral diverticula present (243, 0 > 1).

*Ambiguous optimization:* Posterior branches of mesethmoid narrow (6, 0 > 1), state 0 in *Bagre panamensis*; medial groove of cranium shallow with margins not very conspicuous (31, 1 > 0), state 1 in *Bagre bagre* and *Bagre filamentosus*; dorsal-fin spine prolonged into filament (221, 0 > 1), state 0 in *Bagre panamensis*; lateral line bifurcated, reaching dorsal and ventral caudal-fin lobes (247, 0 > 2).

*Bagre* Cloquet, 1816

MP 100, BI 1, ML 100

(Figs 1–3, 4A, 6)

*Type species:* *Silurus bagre* Linnaeus, 1766.

#### Diagnosis

That of the Bagreinae, above.

#### Included species

*Bagre bagre* Linnaeus, 1766  
*Bagre filamentosus* Swainson, 1839  
*Bagre marinus* Mitchill, 1815  
*Bagre panamensis* Gill, 1863  
*Bagre pinnimaculatus* Steindachner, 1876.

*Habitat and distribution:* Predominantly marine, eastern and western America (Fig. 4).

#### Remarks

The MP and ML analyses corroborate the morphological diagnosis, species composition, and the hypothesis of phylogenetic relationships of *Bagre* presented in previous morphological studies (Marceniuk and Menezes 2007, Marceniuk *et al.* 2012). With different interpretations of phylogenetic relationships, Kailola (2004), Betancur-R. *et al.* (2007), and Betancur-R. (2009) show the same definition and species composition as found in the total-evidence analysis.

## Subfamily Ariinae Bleeker, 1858

MP 100, ML 100

(Figs 1–2)

Type genus: *Arius Valenciennes*, 1840.

## Diagnosis

Mesethmoid medial notch narrow and deep (1,  $0 > 1$ ), state 0 in *Cryptarius* and *Ketengus*, state 2 in *Batrachocephalus*, *Bleekeriella*, *Brustarius utarus*, *Cochlefelis*, *Doiichthys*, *Nedystoma*, *Nemapteryx*, *Netuma*, *Notarius grandicassis*, *Osteogeneiosus*, *Pararius mastersi*, *Papuarus*, *Potamosilurus* (except *Potamosilurus velutinus*), *Sciades parkeri*, and *Sciades proops*; bones forming cephalic shield granulated (33,  $0 > 1$ ); vomerine tooth plates rounded (56,  $0 > 1$ ), state 2 in *Brustarius* (except *Brustarius utarus*) and *Pararius proximus*, state 3 in *Aspistor*; accessory tooth plates large, oval to subtriangular (60,  $0 > 2$ ), state 0 in *Acerioichthys*, *Ariopsis guatemalensis*, *Bleekeriella*, *Chinchaysuyoa*, *Cochlefelis*, *Neoarius*, *Paracinetodus*, and *Papuarus*, state 1 in *Brustarius*, *Hexanematichthys*, *Nemapteryx*, *Pararius*, and *Potamarius usumacintae*, state 2 in *Ariopsis* (except *Ariopsis guatemalensis*), *Arius aff. nenga*, *Arius dispar*, *Arius maculatus*, *Arius oetik*, *Carlarius*, *Genidens machadoi*, *Netuma*, *Notarius*, *Occidentarius*, *Pseudosciades*, and *Sciades*, state 3 in *Batrachocephalus*, *Cathorops*, *Cephalocassis*, *Cryptarius*, *Doiichthys*, and *Hemiarus*; distance between optic foramen and trigemino-facialis foramen about twice as large as trigemino-facialis foramen (68,  $0 > 1$ ), state 0 in *Paragenidens* and *Potamosilurus*; articulation of autopalatine with lateral ethmoid moderately large (109,  $0 > 1$ ); anterior cartilage of autopalatine moderately long, one-third to one-fifth as long as bone itself (113,  $0 > 1$ ), state 0 in *Osteogeneiosus* and state 3 in *Batrachocephalus* and *Ketengus*; premaxilla wide and moderately long, its length more than three times in width (120,  $0 > 1$ ), state 0 in *Acerioichthys*, *Brustarius uterus*, and *Cochlefelis*, state 2 in *Arius gagora*, *Cathorops*, *Cephalocassis*, *Hemipimelodus*, *Neoarius hainesi*, *Notarius rugispinis*, *Notarius phrygiatus*, *Paracinetodus*, and *Plicofollis* (except *Plicofollis platystomus*) and state 3 in *Doiichthys*, *Cinetodus*, *Pachyula*, *Paragenidens*, and *Potamarius* (except *Potamarius usumacintae*); anteroventral portion of opercle subtrapezoidal, moderately long (127,  $0 > 1$ ), state 0 in *Acerioichthys*, *Arius leptanotacanthus*, *Arius nenga*, *Arius oetik*, *Bleekeriella*, *Brustarius utarus*, *Cinetodus*, *Hexanematichthys*, *Nedystoma*, *Pararius mastersi*, and *Pseudosciades* and state 2 in *Cathorops*, *Cryptarius*, *Hemiarus*, and *Pachyula*; more than one-half of posterior part of interopercle contacting ventral margin of opercle (131,  $0 > 1$ ), state 0 in *Arius leptanotacanthus*, *Batrachocephalus*, *Bleekeriella*, *Ketengus*, *Neoarius* (except *Neoarius hainesi*), *Notarius* (except *Notarius rugispinis* and *Notarius phrygiatus*), *Plicofollis platystomus*, and *Sciades* (except *Sciades couma* and *Sciades herzbergii*); metapterygoid as deep as long in perpendicular section (135,  $0 > 1$ ), state 0 in *Doiichthys*, state 2 in *Cathorops*, *Cinetodus*, *Chinchaysuyoa*, *Cryptarius*, *Hemipimelodus*, *Pachyula*, *Paragenidens*, *Plicofollis*, and *Potamarius izabalensis*

and state 3 in *Batrachocephalus* and *Ketengus*; first external branchiostegal ray as broad proximally as distally (147,  $0 > 1$ ); second basibranchial mushroom shaped (166,  $0 > 1$ ), state 0 in *Cochlefelis*, *Brustarius*, *Doiichthys*, *Neoarius*, *Notarius* (except *Notarius rugispinis*, *Notarius planiceps*, and *Notarius phrygiatus*), *Osteogeneiosus*, *Sciades couma*, and *Sciades herzbergii*.

**Ambiguous optimization:** Lateral horn of lateral ethmoid compressed and spatulate (11,  $0 > 1$ ), state 0 in *Aspistor*, *Cephalocassis*, *Cryptarius*, *Hemiarus*, *Hemipimelodus*, *Doiichthyina* (except *Bleekeriella*, *Cinetodus*, *Neoarius*, *Pachyula*, *Paracinetodus*, *Papuarus*, and *Potamosilurus velutinus*), *Notarius* (except *Notarius armbrusteri* and *Notarius biffi*), *Plicofollis platystomus*, *Plicofollis layardi*, and *Sciades* (except *Sciades couma* and *Sciades couma*); lateral horn of lateral ethmoid of variable length and lateroposteriorly oriented (12,  $0 > 1$ ), state 0 in *Acerioichthys*, *Brustarius* (except *Brustarius utarus*), *Cochlefelis danielsi*, *Pararius*, *Plicofollis layardi*, *Sciades* (except *Sciades couma* and *Sciades herzbergii*) and state 2 in *Doiichthys*, *Paragenidens*, *Plicofollis dussumieri*, *Plicofollis nella*, *Plicofollis polystaphylodon*, and *Potamarius* (except *Potamarius usumacintae*); posterior cranial fontanel relatively narrow and long (27,  $0 > 1$ ), state 0 in *Arius leptanotacanthus*, *Arius nenga*, *Brustarius*, *Cathorops* (except *Cathorops dasycephalus*), *Genidentini* (except *Paragenidens*), *Neoarius hainesi*, *Netuma*, *Plicofollis* (except *Plicofollis platystomus*), state 2 in *Aspistor*, *Hemiarus*, *Notarius rugispinis*, *Notarius phrygiatus*, *Papuarus*, and state 3 in *Cephalocassis*, *Doiichthys*, *Hemipimelodus*, *Nedystoma*, and *Nemapteryx*; extrascapular subquadrangular (37,  $0 > 1$ ), state 0 in *Arius*, *Batrachocephalus*, *Betancurichthys*, *Brustarius* (except *Brustarius utarus*), *Genidens*, *Ketengus*, *Notarius* (except *Notarius rugispinis*, *Notarius planiceps*, *Notarius phrygiatus*, and *Notarius troscheli*), *Pararius mastersi*, *Paragenidens*, *Plicofollis*, *Potamarius* (except *Potamarius izabalensis*), *Sciades dowii* and state 2 *Cathorops*, *Cinetodus*, and *Paracinetodus*; temporal fossa moderate to very large (39,  $0 > 1$ ), state 0 in *Arius nenga*, *Bleekeriella*, *Brustarius* (excluded *Brustarius utarus*), *Cathorops*, *Cryptarius*, *Genidens*, *Hemipimelodus*, and *Pararius*; articulation of autopalatine with lateral ethmoid slightly displaced to posterior portion of bone (111,  $1 > 2$ ), state 0 in *Doiichthys*, and state 1 in *Brustarius*, *Cochlefelis*, *Nemapteryx*, and *Neoarius*; dorsal crest of hyomandibula present (140,  $0 > 1$ ); first epibranchial parallel to second epibranchial (179,  $1 > 0$ ), state 1 in *Ketengus*; nuchal plate and parieto-supraoccipital contacting one another through a convex-concave articulation (220,  $0 > 1$ ), state 0 in *Notarius armbrusteri*, *Notarius biffi*, *Notarius kessleri*, and *Notarius neogranatensis* and state 2 in *Aspistor*, *Notarius troscheli*, *Pararius mastersi*, *Sciades* (except *Sciades herzbergii*, *Sciades parkeri*, and *Sciades proops*).

## Included tribes

*Incertae sedis* Ariinae  
Ariini Bleeker, 1858  
Cathoropsini tribe nov.  
Genidentini tribe nov.  
Sciadeini tribe nov.

Key to New World genera, *Ariinae*

- 4a. Adipose-fin base long or very short; ventral tip of subvertebral process acute or spatulate; otolith longer than wide; otolith antero-mesial process inconspicuous .... *Cathoropsini* ..... 5
- 4b. Adipose-fin base moderately long; ventral tip of subvertebral process rounded; otolith almost as long as wide; otolith antero-mesial process conspicuous ... *Incertae sedis*, *Genidentini* and *Sciadeini* ..... 6
- 5a. Accessory tooth plates small, oval; temporal fossa very reduced; anterior margin of otolith markedly irregular, concave; superficial ventral ossification of complex vertebra regularly arched ..... *Cathorops*
- 5b. Accessory tooth plates large, oval to subtriangular; temporal fossa moderate to very large; anterior margin of otolith straight or slightly irregular; otolith posterior margin rounded; superficial ventral ossification of complex vertebra keeled ..... *Notarius*
- 6a. Posterior cranial fontanel absent; epiphyseal bar indistinct ..... 7
- 6b. Posterior cranial fontanel present; epiphyseal bar distinct ..... 8
- 7a. Mesethmoid median portion moderately large; distinct fenestra delimited by lateral ethmoid and frontal; lateral margin of premaxilla with slight concavity; Müllerian ramus distal third gently curved; females with conspicuous pad on pelvic fin ... (*Sciadeini*) ..... *Ariopsis*
- 7b. Mesethmoid median portion very wide; indistinct fenestra delimited by lateral ethmoid and frontal; lateral margin of premaxilla with a very conspicuous concavity; Müllerian ramus distal third straight; females without conspicuous pad on pelvic fin ... (*Sciadeini*) ..... *Sciades*
- 8a. Fenestra delimited by lateral ethmoid and frontal very small or indistinct; temporal fossa absent; subvertebral process indistinct or weakly developed ... (*incertae sedis*) ..... *Occidentarius*
- 8b. Fenestra delimited by lateral ethmoid and frontal distinct and moderately wide; temporal fossa present; subvertebral process well developed ..... 9
- 9a. Posterior cranial fontanel relatively narrow and long; premaxilla very wide and short, as long as wide (except *Paragenidens grandoculis*); mesethmoid median portion very narrow (except *Potamarius usumacintae*); lateral horn of lateral ethmoid long and posteriorly oriented (except *Potamarius usumacintae*); optic foramen very large; distance between optic foramen and trigemino-facialis foramen small, equal to width of trigemino-facialis foramen ..... 10
- 9b. Posterior cranial fontanel reduced to a small opening; premaxilla wide and moderately long, its length more than three times in width; mesethmoid median portion moderately wide; lateral horn of lateral ethmoid variable length and lateroposteriorly oriented; optic foramen moderately large or very reduced; distance between optic foramen and trigemino-facialis foramen large, about twice as large as trigemino-facialis foramen ..... 11
- 10a. Snout very long, snout length 0.5–0.8 times in cephalic shield width at frontal area and 1.6–1.8 times in body width .... (*Sciadeini*) ..... *Potamarius*
- 10b. Snout moderately long, snout length 1.0–1.5 times in cephalic shield width at frontal area and 2.2–2.7 times in body width ... (*Genidentini*) ..... *Paragenidens*
- 11a. Posterior process of cleithrum moderately long, about one-half vertical length of lateral face of cleithrum; gas bladder with single chamber; temporal fossa very reduced; teeth restricted to mesial two-thirds of dentary; pterotic mesial border with parieto-supraoccipital shorter than anterior border with sphenotic ... (*Genidentini*) ..... *Genidens*
- 11b. Posterior process of cleithrum very long, equal to vertical length of lateral face of cleithrum; gas bladder with three chambers; temporal fossa moderate to very large; teeth restricted to mesial three-fourths of dentary; pterotic mesial border with parieto-supraoccipital longer than anterior border with sphenotic ... (*Genidentini*) ..... *Chinchaysuyoa*.

*Ariinae incertae sedis*

(Figs 1–3)

Included genera

*Occidentarius* Betancur-R. & Acero P., 2007.

## Remarks

The monotypic genus *Occidentarius* listed here falls within the *Ariinae* in MP and ML analyses, but its position within the subfamily differs markedly among the different analyses. As such, it is treated here as a member of the *Ariinae*, but not included within either of the named tribes.

*Occidentarius* Betancur-R. & Acero P., 2007

(Figs 1–3, 7–8)

Type species: *Arius platypogon* Günther, 1864.

## Diagnosis

Posterior branch of lateral ethmoid depressed (13, 0 > 1); fenestra delimited by lateral ethmoid and frontal very small or indistinct (17, 1 > 0); temporal fossa absent (38, 0 > 1); epioccipital contacting small narrow area of diagonal crest associated with neural spine of fourth vertebra (44, 2 > 0); ventral crest of parieto-supraoccipital process well-developed through entire



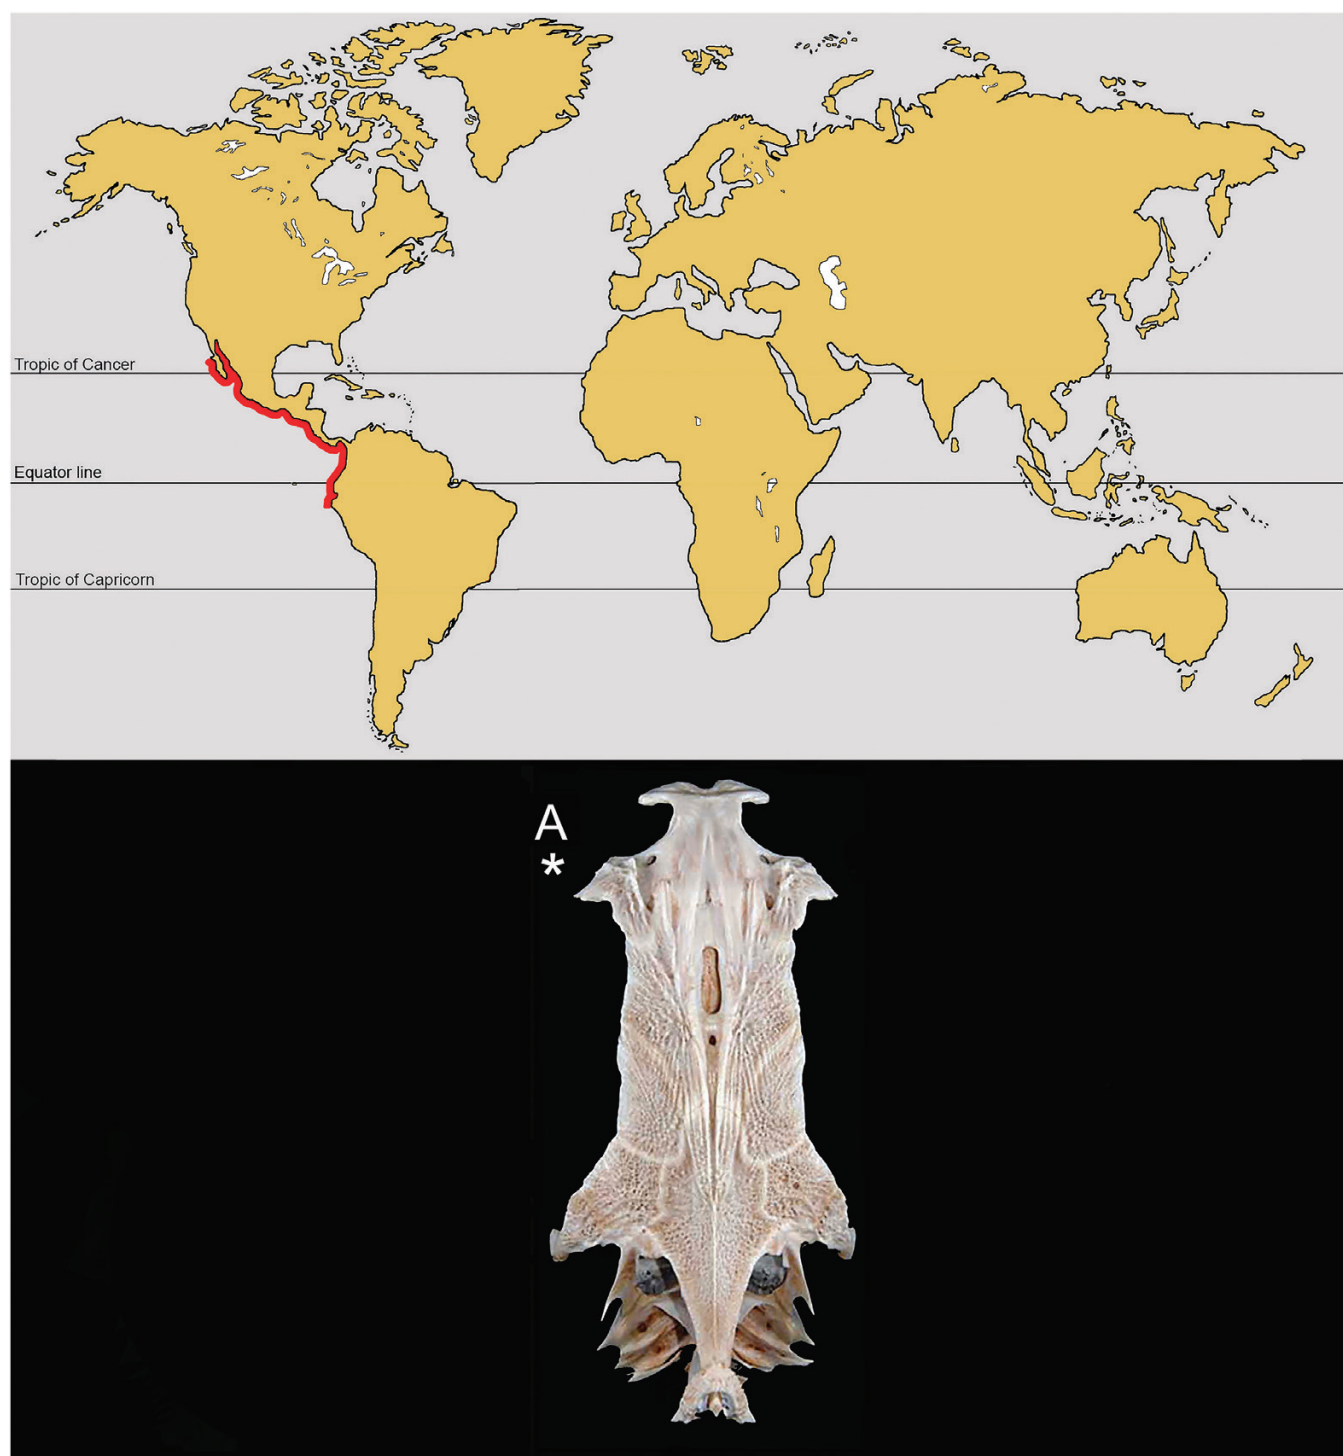

**Figure 7.** Representative skull, in dorsal view, and distribution of the Ariinae incertae sedis. A, *Occidentarius platypogon*, catfishesbone. acnatsci.org.

extension of process (48, 0 > 1); transverse crest associated with neural spine of fourth vertebra very high (200, 0 > 1); median crest associated with neural spine of third vertebra very high (201, 0 > 1); median crest associated with neural spine of fourth vertebra very high (202, 0 > 1). *Ambiguous optimization*: Vomer lateral processes wide (53, 1 > 0); tooth plates associated with vomer present (55, 0 > 1); subvertebral process indistinct or weakly developed (78, 1 > 0); dorsal crest of urohyal projected anteriorly (156, 0 > 1).

#### Included species

*Occidentarius platypogon* (Günther, 1864).

*Habitat and distribution*: Marine, western America (Fig. 7).

#### Remarks

The genus *Occidentarius* was well defined in previous morphological and molecular studies (Marceniuk and Menezes 2003, Betancur-R. 2009, Marceniuk *et al.* 2012), which was

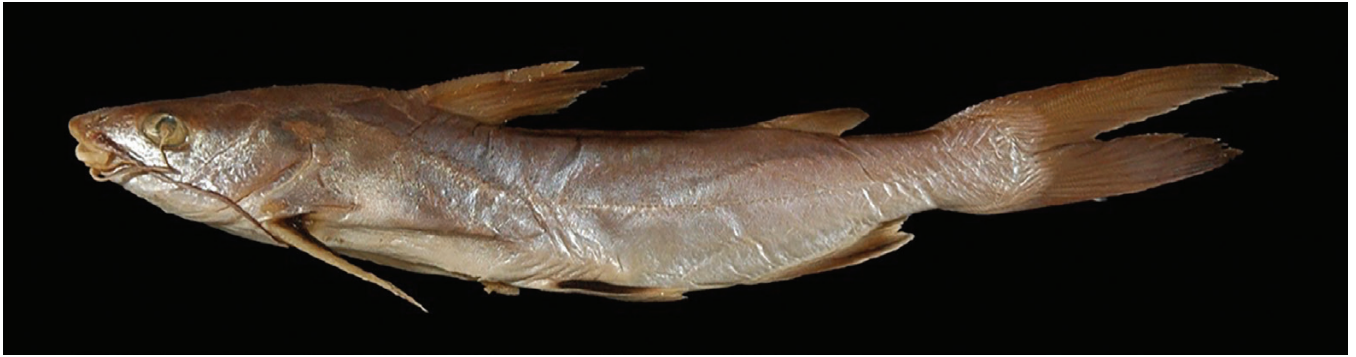

Figure 8. *Occidentarius platypogon*, BMNH 1864.1.26.316-319, eastern Pacific, type species of the genus.

corroborated in the present analysis, but without consensus regarding its relationships.

**Cathoropsini tribe nov.**

MP 64, BI 1, ML 85

(Figs 1–3, 9)

ZooBank registration: [urn:lsid:zoobank.org:act:429CBD26-08F8-4207-BB19-13F4260D7CFB](https://zoobank.org/urn:lsid:zoobank.org:act:429CBD26-08F8-4207-BB19-13F4260D7CFB).

Type genus: *Cathorops* Jordan & Gilbert, 1883.

**Diagnosis**

Mesethmoid median portion very narrow (2, ? > 0), state 1 in *Notarius biffi*, *Notarius kessleri*, and *Notarius neogranatensis*, and state 2 in *Notarius cookei*, *Notarius grandicassis*, and *Notarius troscheli*; bony bridge formed by lateral ethmoid and frontal cylindrical and thin (16, 0 > 1); otolith longer than wide (73, 0 > 1); subvertebral process long and narrow (79, 0 > 1); transcapular process forming a right angle in relation to body axis 86 (0 > 1), state 0 in *Notarius cookei* and *Notarius grandicassis*; exoccipital bony crest parallel to vertebral column and mesially folded (92, 1 > 2), state 3 in *Notarius*.

**Ambiguous optimization:** Frontal mesial laminar projection present (23, 1 > 0); posterior cranial fontanel formed by frontals and parieto-supraoccipital (25, 1 > 0); pterotic mesial border with parieto-supraoccipital longer than anterior border with sphenotic (36, 0 > 1), reversed in *Notarius*; vomer lateral processes very narrow (53, 0 > 1), reversed in *Aspistor*; otolith anteromesial process inconspicuous (72, 1 > 0), homoplastic in *Galeichthys*; dorsal crest of urohyal projected anteriorly (156, 0 > 1), reversed in *Notarius rugispinis*, *Notarius planiceps*, and *Notarius phrygiatus*; 14 or fewer ribs (213, 1 > 0), reversed in *Notarius*; seventh vertebra free from ventral superficial ossification (214, 0 > 1).

**Included genera**

*Notarius* Gill, 1863

*Cathorops* Jordan & Gilbert, 1883.

**Remarks**

BI analyses and ML analyses did not recognize *Aspistor* as a valid genus as was reported by Marцениuk and Menezes (2007) and Marцениuk *et al.* (2012) on morphological evidence (see *Notarius* Remarks).

***Cathorops* Jordan & Gilbert, 1883**

MP 100, BI 1, ML 100

(Figs 1–3, 9A–10)

*Arius hypophthalmus* Steindachner, 1876.

**Diagnosis**

Posterior branches of mesethmoid narrow (6, 0 > 1); posterior branches of mesethmoid parallel throughout their entire extension (7, 0 > 1); frontal as main component of bony bridge formed by lateral ethmoid and frontal (15, 0 > 2); fenestra delimited by lateral ethmoid and frontal very large (17, 1 > 2); epioccipital contacting both diagonal and transversal crests associated with neural spine of fourth vertebra (44, 0 > 1); accessory tooth plates small, vertically oval (60, 2 > 3); otic capsules weakly differentiated (69, 0 > 1); anterior margin of subvertebral process keeled (81, 0 > 1); basioccipital lateral process very long (84, 0 > 1); transcapular process depressed (88, 0 > 1); premaxilla narrow and very long, its length two to three times in width (120, 1 > 2); anteroventral portion of opercle subtrapezoidal, very short (127, 1 > 2); anteroventral margin of opercle concave or almost straight (128, 0 > 1); posterior margin of interopercle straight and inclined (130, 0 > 1); anterior portion of interopercle compressed and bifurcate (132, 0 > 1); metapterygoid anterior process rounded (138, 0 > 2); ventral crest of hyomandibula absent (142, 0 > 1); second external branchiostegal ray almost as wide as first ray (148, 0 > 1); anterior portion of anterior ceratohyal compressed (150, 0 > 1); anterior margin of urohyal not notched (154, 0 > 1); posterolateral processes of urohyal short (160, 1 > 0); transverse crest associated with neural spine of fourth vertebra very high (200, 0 > 1); median crest associated with neural spine of fourth vertebra very high (202, 0 > 1); general aspect of superficial ventral ossification of Weberian ossification regularly arched (211, 0 > 1); 18 or fewer precaudal vertebrae (215, 1 > 0); second dorsal cleithral process dorsally directed and parallel to first dorsal process (226, 0 > 1).

**Ambiguous optimization:** Temporal fossa very reduced (39, 1 > 0); anterior margin of otolith markedly irregular, concave (71, ? > 3); anterior opening of aortic canal within base of subvertebral process and anteriorly oriented (77, ? > 2); ventral tip of subvertebral process spatulate (80, ? > 3).

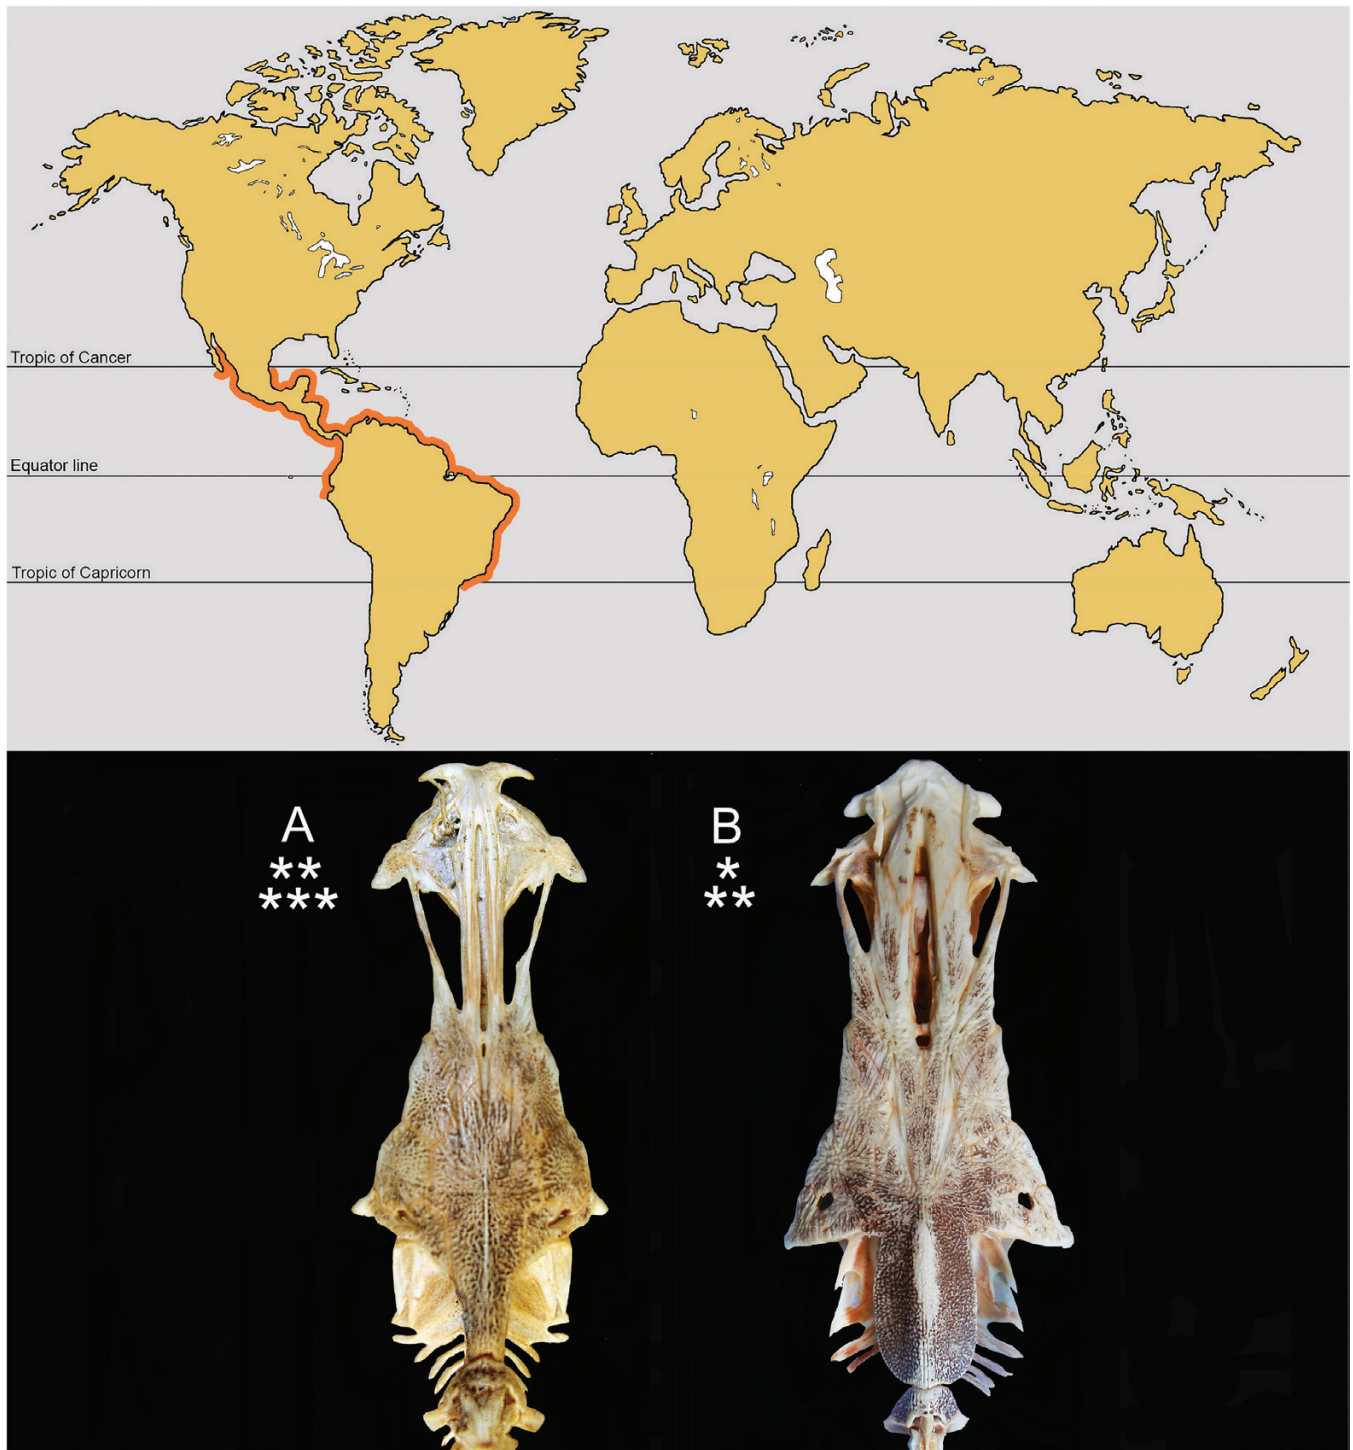

**Figure 9.** Representative skulls, in dorsal view, and distribution of **Cathoropsini tribe nov.** A, *Cathorops hypophthalmus*, USNM 293275. B, *Notarius grandicassis*, MPEG 30647. \* marine, \*\* brackish waters, \*\*\* freshwater.

#### Included species

*Cathorops agassizii* (Eigenmann & Eigenmann, 1888)  
*Cathorops aguadulce* (Meek, 1904)  
*Cathorops arenatus* (Valenciennes, 1840)  
*Cathorops belizensis* Marceniuk & Betancur-R., 2008 \*  
*Cathorops dasycephalus* (Günther, 1864)  
*Cathorops festae* (Boulenger, 1898)  
*Cathorops fuerthii* (Steindachner, 1876)

*Cathorops higuchii* Marceniuk & Betancur-R., 2008  
*Cathorops hypophthalmus* (Steindachner, 1876)  
*Cathorops kailolae* Marceniuk & Betancur-R., 2008 \*  
*Cathorops liropus* (Bristol, 1897) \*  
*Cathorops manglarensis* Marceniuk, 2007  
*Cathorops mapale* Betancur-R. & Acero P., 2005  
*Cathorops melanopus* (Günther, 1864) \*  
*Cathorops multiradiatus* (Günther, 1864)



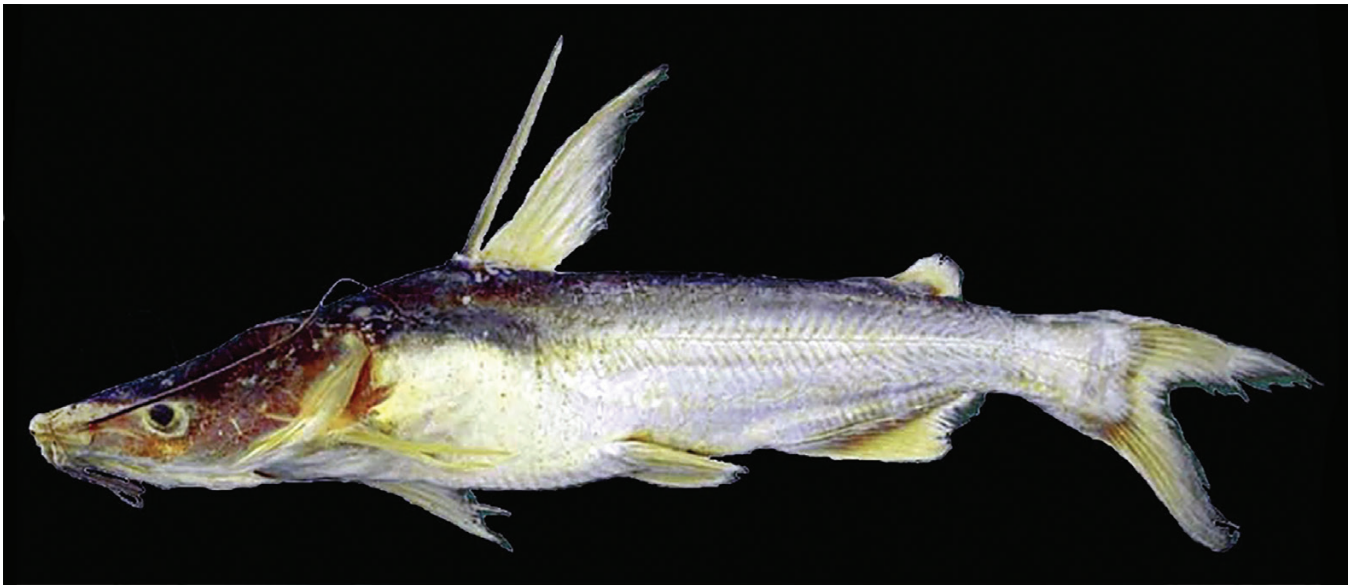

Figure 10. *Cathorops hypophthalmus*, USNM 293275, Panama Pacific drainage rivers, type species of the genus.

*Cathorops nuchalis* (Günther, 1864) \*

*Cathorops raredonae* Marceniuk, Betancur-R. & Acero P., 2009

*Cathorops spixii* (Agassiz, 1829) \*

*Cathorops steindachneri* (Gilbert & Starks, 1904)

*Cathorops taylori* (Hildebrand, 1925)

*Cathorops tuyra* (Meek & Hildebrand, 1923)

*Cathorops wayuu* Betancur-R., Acero P. & Marceniuk, 2012.

**Habitat and distribution:** Fresh and brackish waters, eastern and western Central and South America (Fig. 9).

#### Remarks

The monophyly *Cathorops* has been shown to be well supported in previous studies (Betancur-R. *et al.* 2007, Marceniuk and Menezes 2007, Betancur-R. 2009, Marceniuk *et al.* 2012), but there is no consensus regarding their relationships in previous morphological and molecular studies (Betancur-R. *et al.* 2007, Betancur-R. 2009, Marceniuk *et al.* 2012). Results of the total-evidence analysis corroborates the monophyly of *Cathorops* and its sister group relationship with *Notarius* (including *Aspistor*), as postulated in previous molecular studies.

Within *Cathorops*, species share a suite of molecular and morphological characters not found in the species of *Cathorops dasycephalus*. The total-evidence hypothesis presented above places *Cathorops dasycephalus* as the sister group to all remaining *Cathorops*, and was assigned to a separate subgenus *Cathorops (Precathorops)* Betancur-R. & Acero P. (2007). Morphological character states shared by the remaining species, in *Cathorops (Cathorops)*, are as follows: fenestra delimited by mesethmoid and lateral ethmoid present (3, 0 > 1); fenestra delimited by mesethmoid and lateral ethmoid small, not filled with cartilage (4, ? > 0); mesethmoid posterior horn tubular, narrow and elongate (5, 0 > 1); posterior branches of mesethmoid very long, delimiting one-half of length of anterior cranial fontanel (8, 0 > 2); posterior cranial fontanel reduced to a small opening (27, 1 > 0); extrascapular delimiting more than three-fifths of temporal fossa (40, 0 > 1); tooth plates associated with vomer absent (55, 1 > 0); accessory tooth plates molariform (61, 0 > 1); ventral process at symphysis of dentary long and very conspicuous (115,

1 > 2); teeth acicular and molariform on dentary (117, 0 > 1); metapterygoid one and a one-half times longer than deep in perpendicular section (135, 1 > 2); first hypobranchial very elongate transversely, its mesial face well developed and acute 172 (0 > 1); anterior process of first hypobranchial inconspicuous (173, 0 > 1); second hypobranchial very elongate transversely, its mesial face acute (176, 0 > 1); space for insertion of teeth on fifth ceratobranchial very small (194, 1 > 2); cardinal veins at same level of aortic canal (210, 0 > 1); posterior process of cleithrum very short (224, 1 > 0); cleithrum lateral face very narrow (227, 0 > 1).

**Ambiguous optimization:** Posterior cranial fontanel formed exclusively frontals (25, 0 > 1).

*Notarius* Gill, 1863

MP 100, BI 1, ML 93

(Figs 1–3, 9B, 11)

**Type species:** *Arius grandicassius* Valenciennes, 1840.

#### Diagnosis

Epiphyseal bar transversely elongate and longitudinally narrow (29, 0 > 1); medial groove of cranium absent 30 (0 > 1); vomer anterior margin very pronounced and acute (50, 0 > 1); parasphenoid very wide in ventral view (66, 0 > 1); posterior process of exoccipital absent (90, 1 > 0); exoccipital bony crest parallel to vertebral column and mesially folded (92, 1 > 2); sesamoid bone I irregularly shaped (145, 1 > 2); accessory crest connecting transverse and median crests associated with neural spine of fourth vertebra present (204, 0 > 1).

**Ambiguous optimization:** Lateral horn of lateral ethmoid acute (11, 1 > 0); interior margin of otolith straight or slightly irregular (71, 0 > 1); anterior opening of aortic canal at base of subvertebral process and anteroventrally oriented (77, ? > 1); ventral tip of subvertebral process acute (80, ? > 2); adipose-fin base long (222, 3 > 1); gas bladder lateral diverticula present (243, 0 > 1).

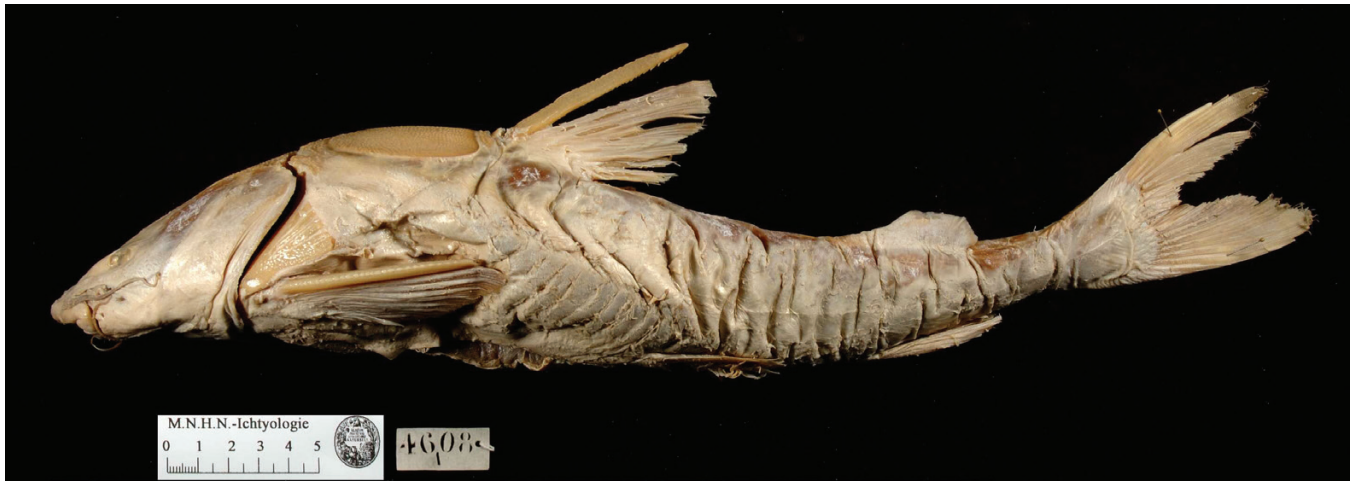

Figure 11. *Notarius grandicassis*, MNHN A-4608, Atlantic South America, type species of the genus.

#### Included species

*Notarius armbrusteri* Betancur-R. & Acero P., 2006  
*Notarius biffi* Betancur-R. & Acero P., 2004  
*Notarius bonillai* (Miles, 1945)  
*Notarius cookei* (Acero P. & Betancur-R., 2002)  
*Notarius grandicassis* (Valenciennes, 1840)  
*Notarius insculptus* (Jordan & Gilbert, 1883)  
*Notarius kessleri* (Steindachner, 1876)  
*Notarius* aff. *kessleri*  
*Notarius lentiginosus* (Eigenmann & Eigenmann, 1888)  
*Notarius luniscutis* (Valenciennes, 1840)  
*Notarius neogranatensis* (Acero P. & Betancur-R., 2002)  
*Notarius osculus* (Jordan & Gilbert, 1883) \*  
*Notarius parmocassis* (Valenciennes, 1840) \*  
*Notarius phrygiatus* (Valenciennes, 1840)  
*Notarius planiceps* (Steindachner, 1876)  
*Notarius* aff. *planiceps*  
*Notarius quadriscutis* (Valenciennes, 1840)  
*Notarius rugispinis* (Valenciennes, 1840)  
*Notarius troschelii* (Gill, 1863).

**Habitat and distribution:** Brackish and marine waters, eastern and western Central and South America (Fig. 9).

#### Remarks

The total-evidence analysis corroborates the monophyly, relationships, and species composition of *Notarius* as previously uncovered by molecular evidence (Betancur-R. et al. 2007; Betancur-R. 2009). The generic names *Amphiarius* and *Aspistor*, recognized as valid in previous morphological analyses (Marceniuk and Menezes 2007, Marceniuk et al. 2012), are treated herein as junior synonyms of *Notarius*.

#### Genidentini tribe nov.

BI 0.50

(Figs 3, 12, 14)

ZooBank registration: [urn:lsid:zoobank.org:act:0A08A650-D594-4104-8789-89C13E57B3F9](https://zoobank.org/urn:lsid:zoobank.org:act:0A08A650-D594-4104-8789-89C13E57B3F9).

Type genus: *Genidens* Castelnau, 1855.

#### Diagnosis (all of ambiguous optimization)

Posterior cranial fontanel small (27, 1 > 0), state 1 in *Paragenidens*; pterotic mesial border with parieto-supraoccipital longer than anterior border with sphenotic (36, 0 > 1), reversed in *Genidens*; vomer lateral processes very narrow (53, 0 > 1); tooth plates associated with vomer absent (55, 1 > 0), reversed in *Genidens* (except *Genidens genidens*); maxilla mesial and lateral margins parallel in proximal two-thirds, converging in distal one-third, distal margin truncate (102, 2 > 0), state 3 in *Paragenidens*.

#### Included genera

*Chinchaysuyoa* Marceniuk et al. 2019  
*Genidens* Castelnau, 1855  
*Paragenidens* Marceniuk et al. 2019.

#### Remarks

Within Genidentini, *Genidens* and *Paragenidens* share a suite of molecular and morphological characters not found in *Chinchaysuyoa*. The total-evidence hypothesis places *Genidens* and *Paragenidens* as sister groups, sharing the following morphological character states: lateral margins of orbitosphenoid progressively diverging anteriorly (63, 0 > 1); second basibranchial spindle shaped (166, 1 > 0); second dorsal cleithral process dorsally directed and parallel to first dorsal process (226, 0 > 1).

**Ambiguous optimization:** Medial groove of cranium delimited mainly by parieto-supraoccipital (32, 1 > 0); extrascapular subrectangular (37, 1 > 0).

*Chinchaysuyoa* Marceniuk et al. 2019

(Figs 1–3, 12A–13)

Type species: *Arius labiatus* Boulenger, 1898.

#### Diagnosis

Mesethmoid posterior horn tubular, narrow, and elongate (5, 0 > 1); bony bridge formed by lateral ethmoid and frontal cylindrical and thin (16, 0 > 1); vomer anterior margin very pronounced and acute (50, 0 > 1); accessory tooth plates small, transversely elongate, and narrow (60, 2 > 0); optic foramen



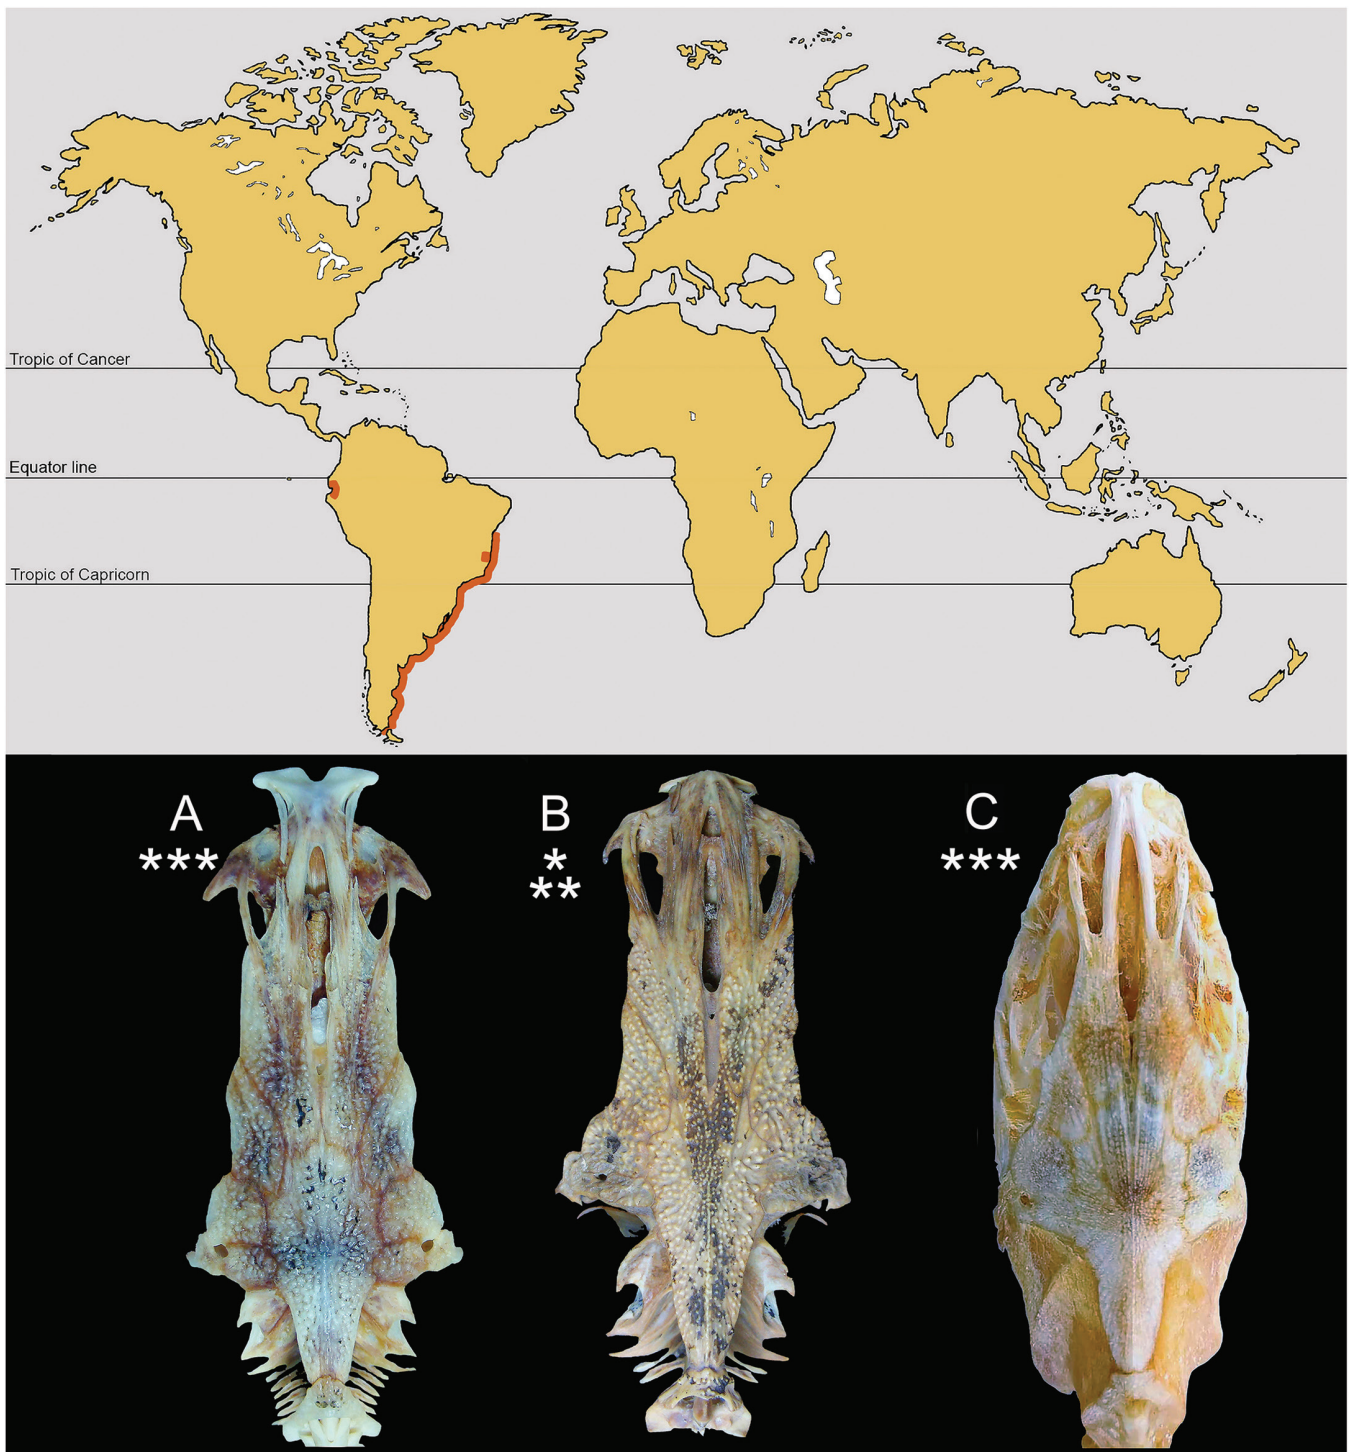

**Figure 12.** Representative skulls, in dorsal view, and distribution of **Genidentini tribe nov.** A, *Chinchaysuyoa ortegai*, MPEG 35976. B, *Genidens genidens*, MZUSP 51694. C, *Paragenidens grandoculis*, CIUFES 3763. \* marine, \*\* brackish waters, \*\*\* freshwater.

very reduced (67,  $1 > 2$ ); anterior opening of aortic canal at base of subvertebral process and anteroventrally oriented (77,  $0 > 1$ ); posterior process of exoccipital connected to Müllerian ramus by suture (93,  $0 > 1$ ); one-half or less of interopercle posterior part contacting ventral margin of opercle (131,  $1 > 0$ ); anterior portion of interopercle compressed and bifurcate (132,  $0 > 1$ ); interopercle anterior portion conspicuously narrow (133,  $0 > 1$ ); metapterygoid one and a one-half times longer than deep in perpendicular section (135,  $1 > 2$ ); uncinat process of third

epibranchial much longer and wider than mesial portion of third epibranchial delimited by uncinat process (182,  $0 > 1$ ); posterior process of cleithrum very long (224,  $1 > 2$ ); gas bladder with three chambers (238,  $0 > 2$ ).

#### *Included species*

*Chinchaysuyoa ortegai* Marceniuk, Marchena, Oliveira & Betancur-R., 2019

*Chinchaysuyoa labiata* (Boulenger, 1898) \*.



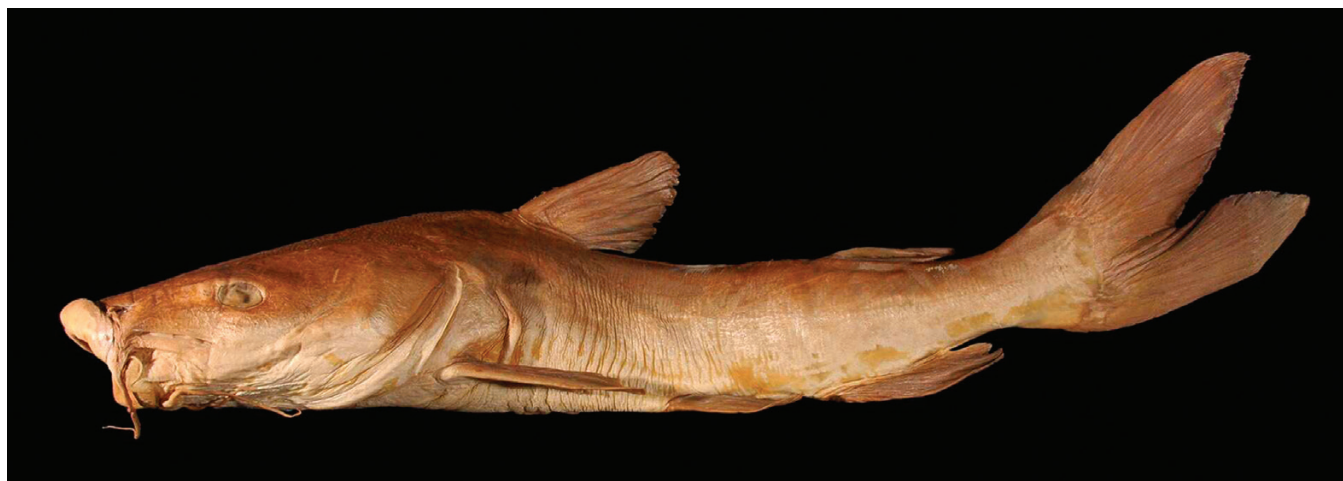

**Figure 13.** *Chinchaysuyoia labiata*, MZUT 1540, western Ecuador Guayas River Basin, type species of the genus.

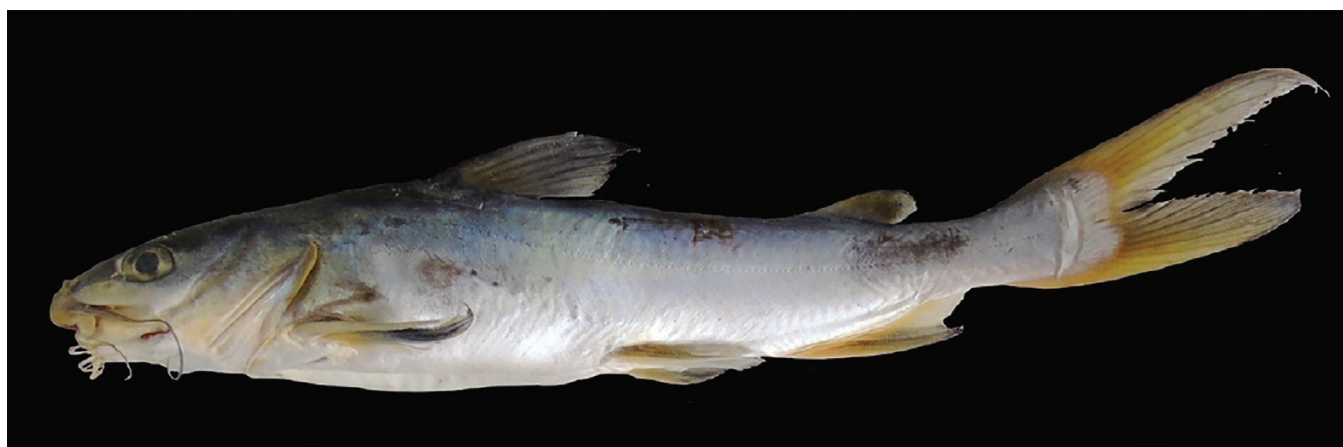

**Figure 14.** *Genidens genidens*, western South Atlantic, photograph by Alexandre P. Marceniuk, type species of the genus.

**Habitat and distribution:** Freshwater, western South America in Ecuador and Peru (Fig. 12).

#### Remarks

The total-evidence analysis corroborates the monophyly, relationships, and species composition of *Chinchaysuyoia*, as proposed by Marceniuk *et al.* (2019b).

*Genidens* Castelnau, 1855

MP 100, BI 1, ML 100

(Figs 1–3, 12B, 14)

**Type species:** *Bagrus genidens* Valenciennes, 1840.

#### Diagnosis

Temporal fossa very reduced (39, 1 > 0); dentary teeth restricted to mesial two-thirds (116, 1 > 0); posterolateral processes of urohyal short (160, 1 > 0); posterolateral processes of urohyal two-thirds as long as distal portion of bone (162, 1 > 2); posterior portion of second basibranchial short and wide (167, 2 > 3).

**Ambiguous optimization:** Mesial border with parieto-supraoccipital as long as distal portion of bone (36, 1 > 0); tooth plates attached to vomer by ligaments (57, 0 > 1); otolith posterior margin rounded (74, 1 > 0); posterolateral processes of urohyal as long as or longer than distal portion of bone (162, 0 > 1).

#### Included species

*Genidens barbatus* (Lacepède, 1803)

*Genidens genidens* (Cuvier, 1829)

*Genidens machadoi* (Miranda Ribeiro, 1918)

*Genidens planifrons* (Higuchi, Reis & Araújo, 1982).

**Habitat and distribution:** Brackish and marine waters, east and southern South America (Fig. 12).

#### Remarks

Total-evidence analysis supports the monophyly of *Genidens*, as reported in previous phylogenetic studies (Betancur-R. 2009, Marceniuk *et al.* 2012), with a new hypothesis of relationships. The species of *Genidens* form a species flock, as evidenced by their shallow genetic divergences (Cerqueira *et al.*, unpublished work).

*Paragenidens* Marceniuk *et al.* 2019

(Figs 1–3, 12C, 15)

*Type species:* *Arius grandoculis* Steindachner, 1877.*Diagnosis*

Mesethmoid median portion very narrow (2, 1 > 0); lateral horn of lateral ethmoid long and posteriorly oriented (12, 1 > 2); bony bridge formed by lateral ethmoid and frontal cylindrical and thin (16, 0 > 1); frontal mesial laminar projection absent (23, 1 > 0); anterior margin of vomer very pronounced and acute (50, 0 > 1); lateral expansions of orbitosphenoid and pterosphonoid absent (64, 1 > 0); optic foramen very large (67, 1 > 0), homoplastic in *Potamarius*; distance between optic foramen and trigemino-facialis foramen small, equal to width of trigemino-facialis foramen (68, 1 > 0); contact face for articulation of transcapular process with basioccipital large and depressed (85, 0 > 1); transcapular process very short and thick (87, 0 > 1); maxilla lateral and mesial margins considerably closer to each other proximally, distally narrow and pointed (102, 2 > 3); premaxilla very wide and short, only as long as wide (120, 1 > 3); opercle posterior portion well developed posteriorly (129, 0 > 1); interopercle rectangular (134, 0 > 1), homoplastic in *Potamarius*; metapterygoid one and one-half times longer than deep in perpendicular section (135, 1 > 2); metapterygoid anterior process truncate (138, 0 > 1); bony blade connecting posterolateral processes of urohyal absent (159, 0 > 1); third basibranchial long and narrow (169, 1 > 2); third pharyngobranchial funnel shaped (192, 1 > 0); 14 or fewer ribs (213, 1 > 0).

*Ambiguous optimization:* Posterior cranial fontanel relatively narrow and long (27, 0 > 1).

*Included species*

*Paragenidens grandoculis* (Steindachner, 1877).

*Habitat and distribution:* Fresh and brackish waters, east coast of Brazil (Fig. 12).

*Remarks*

The total-evidence analysis corroborates the result of a previous morphological and molecular study that supports the recognition of *Paragenidens* (Marceniuk *et al.* 2019c).

*Sciadeini* tribe nov.

MP 84, BI 1, ML 98

(Figs 1–3, 16)

ZooBank registration: [urn:lsid:zoobank.org:act:02882C05-C5B8-48C9-B796-0339081B8412](https://zoobank.org/urn:lsid:zoobank.org:act:02882C05-C5B8-48C9-B796-0339081B8412).

*Type genus:* *Sciades* Müller & Troschel, 1849.

*Diagnosis*

Posterior branch of lateral ethmoid depressed (13, 0 > 1), reversed in *Potamarius izabalensis*; posterior process of exoccipital connected to Müllerian ramus by suture (93, 0 > 1).

*Ambiguous optimization:* Posterior cranial fontanel absent (26, 1 > 0), reversed in *Potamarius*; epiphyseal bar indistinct (28, 0 > 1), reversed in *Potamarius*; temporal fossa absent (38, 0 > 1); subvertebral process indistinct or weakly developed (78, 1 > 0), reversed in *Potamarius*.

*Included genera*

*Ariopsis* Gill, 1861

*Potamarius* Hubbs & Miller, 1960

*Sciades* Müller & Troschel, 1849.

*Remarks*

The total-evidence analysis brings significant results concerning the definition of limits and species composition of *Sciades*. The present analysis supports the hypothesis of monophyly, relationships, and species composition as defined based on previous molecular studies (Betancur-R. *et al.* 2007, Betancur-R. 2009). The inclusion of Old World species in *Sciades* (Marceniuk and Menezes 2007, Marceniuk *et al.* 2012), here assigned to *Hexanematichthys* or *Pseudosciades*, is interpreted as a result of morphological convergence, mainly smaller skull openings (characters 26, 28, and 93).

*Ariopsis* Gill, 1861

MP 100, BI 1, ML 99

(Figs 1–3, 16A, 17)

*Type species:* *Arius milberti* Valenciennes, 1840.

*Diagnosis (all of ambiguous optimization)*

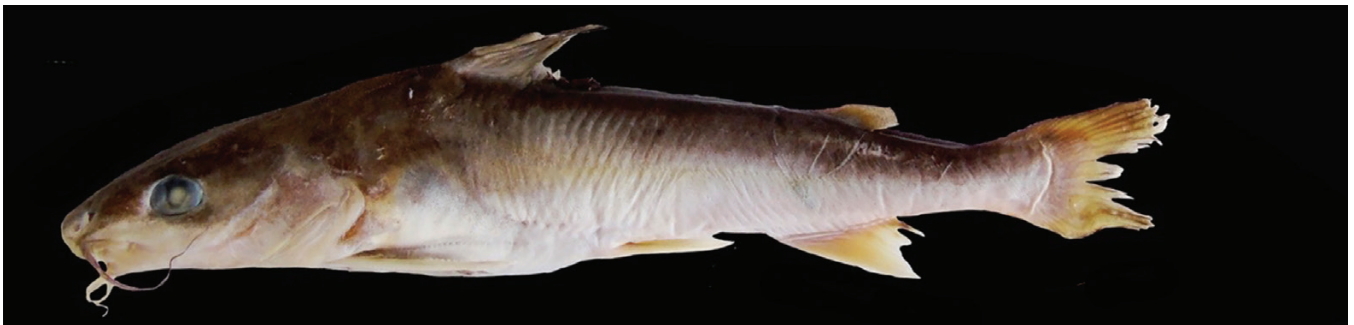

Figure 15. *Paragenidens grandoculis*, LBP 24068, coastal lakes and estuaries of south-eastern Brazil, type species of the genus.

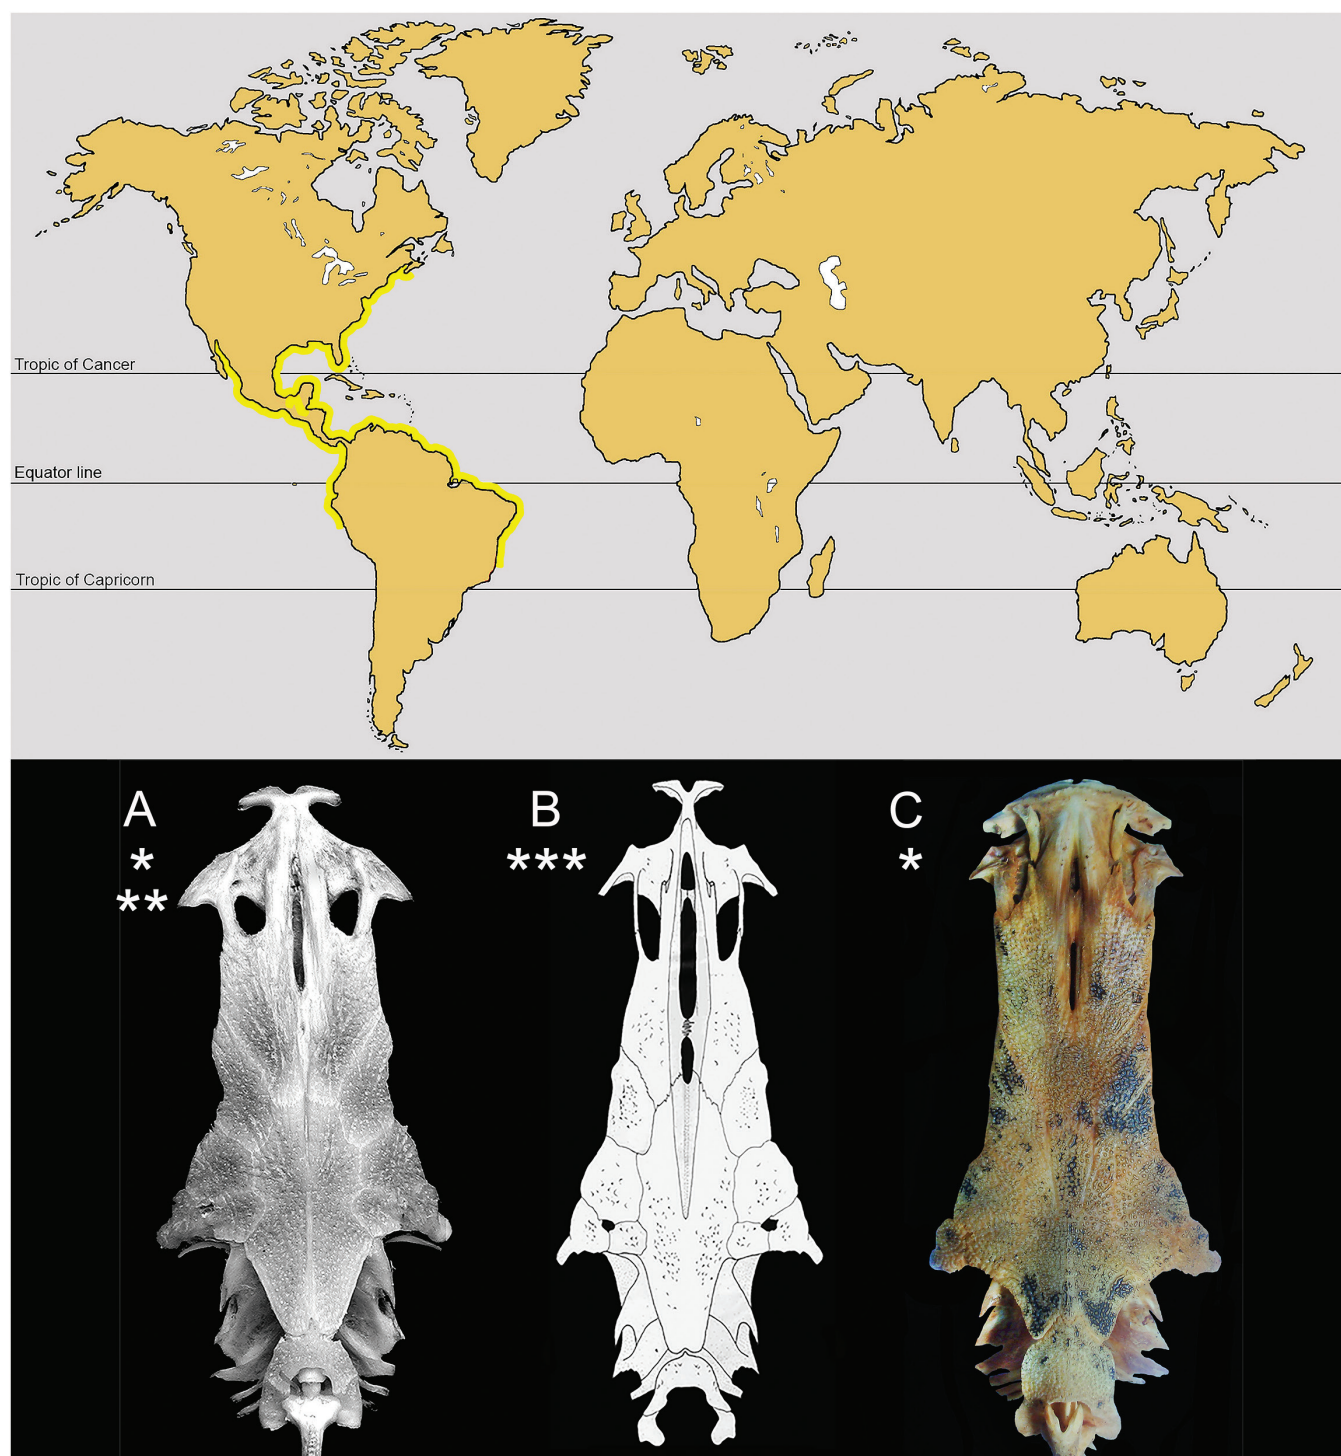

**Figure 16.** Representative skulls, in dorsal view, and distribution of **Sciadeini tribe nov.** A, *Ariopsis felis*, <http://catfishbone.acnatsci.org>. B, *Potamarius izabalensis*, UMMZ 177252. C, *Sciades parkeri*, MPEG APM 147. \* marine, \*\* brackish waters, \*\*\* freshwater.

Third basibranchial chalice shaped (168, 0 > 1), reversed in *Ariopsis guatemalensis*; Müllerian ramus bone blade evident only in basal third (206, 2 > 1), state 2 in *Ariopsis canteri*.

#### Included species

*Ariopsis assimilis* Günther, 1864 \*

*Ariopsis canteri* Acero P, Betancur-R. & Marceniuk, 2017

*Ariopsis felis* Linnaeus, 1766

*Ariopsis gilberti* Jordan & Williams, 1895 \*

*Ariopsis guatemalensis* Günther, 1864

*Ariopsis jimenezi* Marceniuk et al., 2017 \*

*Ariopsis seemanni* Günther, 1864

*Ariopsis simonsi* Starks, 1906.

**Habitat and distribution:** Freshwater, brackish, and marine waters, North America, Central America and northern South America (Fig. 16).



*Remarks*

The total-evidence analysis corroborates the monophyly of *Ariopsis* and the relationships established by molecular data (Betancur-R. *et al.* 2007, Betancur-R. 2009), with the same species composition as in the recent revision of the genus (Marceniuk *et al.* 2017b). The overall morphological similarity of *Sciades* and *Ariopsis* is expressed by the synonymy of the genera in previous morphological analyses (Marceniuk and Menezes 2007, Marceniuk *et al.* 2012).

*Potamarius* Hubbs & Miller, 1960

MP 100, BI 1, ML 100

(Figs 1–3, 16B, 18)

*Type species:* *Conorhynchos nelsoni* Evermann & Goldsborough, 1902.

*Diagnosis*

Epioccipital contacting small narrow area of diagonal crest associated with neural spine of fourth vertebra (44, 2 > 0); lateral margins of orbitosphenoid progressively diverging anteriorly (63, 0 > 1); optic foramen very large (67, 1 > 0); distance between optic foramen and trigemino-facialis foramen small, equal to width of trigemino-facialis foramen (68, 1 > 0); contact face for articulation of transcapular process with basioccipital large and depressed (85, 0 > 1); opercle posterior portion well developed posteriodorsally (129, 0 > 1); interopercle rectangular (134, 0 > 1).

*Ambiguous optimization:* Posterior cranial fontanel present (26, 0 > 1); epiphyseal bar conspicuous (28, 1 > 0); temporal fossa present (38, 1 > 0); vomer lateral processes very narrow (53, 0 > 1); subvertebral process well developed (78, 0 > 1); maxilla lateral and mesial margins considerably closer to each other proximally, distally narrow and pointed (102, 2 > 3); metapterygoid anterior process truncate (138, 0 > 1); second basibranchial spindle-shaped (166, 1 > 0); third basibranchial very short and wide (169, 1 > 0); extension of diagonal crest associated with posterior branch of parapophysis of complex vertebra short, reaching transverse crest (199, 1 > 0); opening delimited by epioccipital posterior process and crests of sustentaculum of Weberian apparatus very large (203, 2 > 0); 14 or fewer ribs (213, 1 > 0); second dorsal cleithral process dorsally directed and parallel to first dorsal process (226, 0 > 1); protractor muscle of parapophysis of fourth vertebra originating from ventral surface of parieto-supraoccipital process and posterior process of epioccipital (248, 1 > 0).

*Included species*

*Potamarius izabalensis* Hubbs & Miller, 1960

*Potamarius nelsoni* Evermann & Goldsborough, 1902

*Potamarius usumacintae* Betancur-R. & Willink, 2007.

*Habitat and distribution:* Freshwater, eastern Central America (Fig. 16).

*Remarks*

The total-evidence analysis corroborates the monophyly, relationships and species composition of *Potamarius sensu*

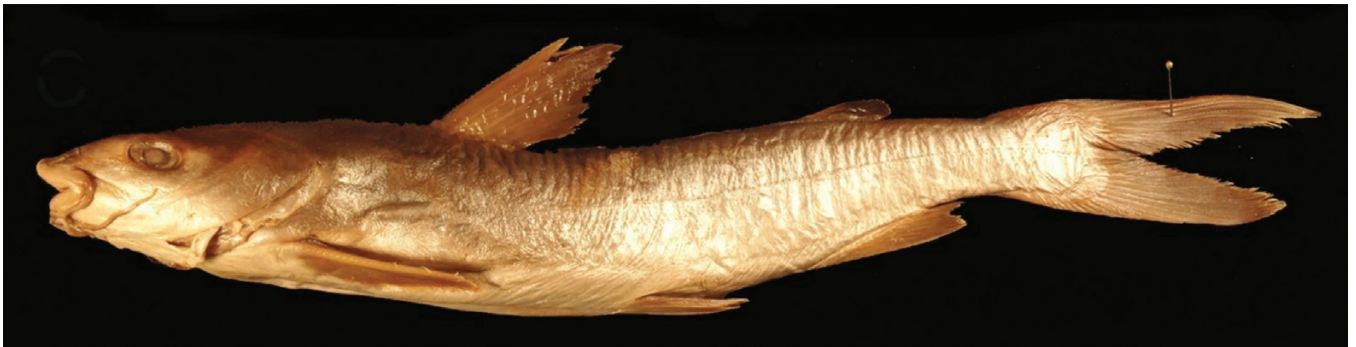

Figure 17. *Ariopsis felis*, MNHN B-0593 (senior synonym of *Arius milberti*), north-western Atlantic, type species of the genus.

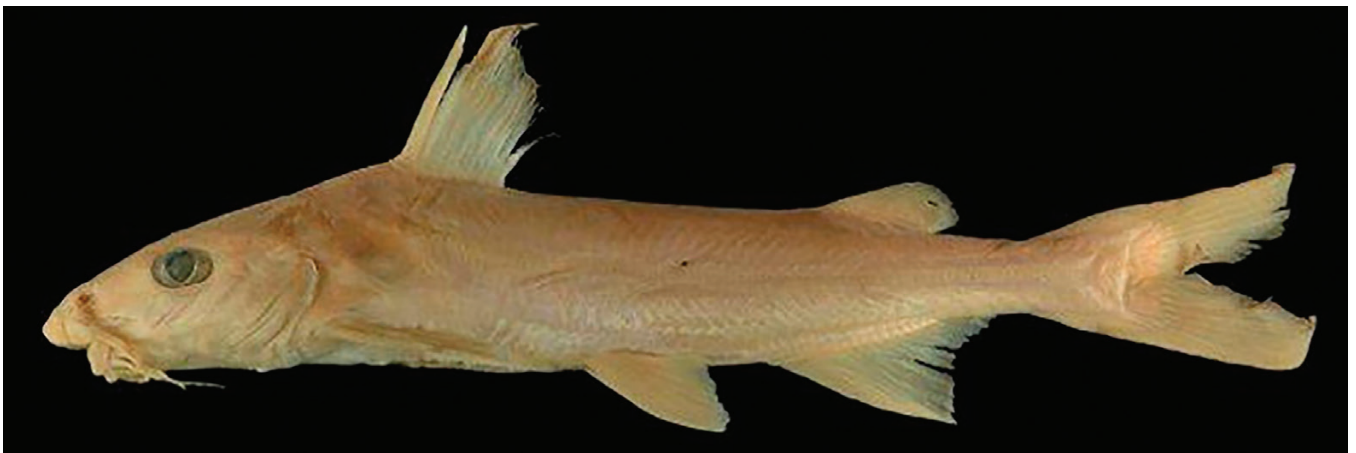

Figure 18. *Potamarius nelsoni*, Usumacinta River Basin, Mexico and Guatemala, photograph by Heok Hee Ng, type species of the genus.

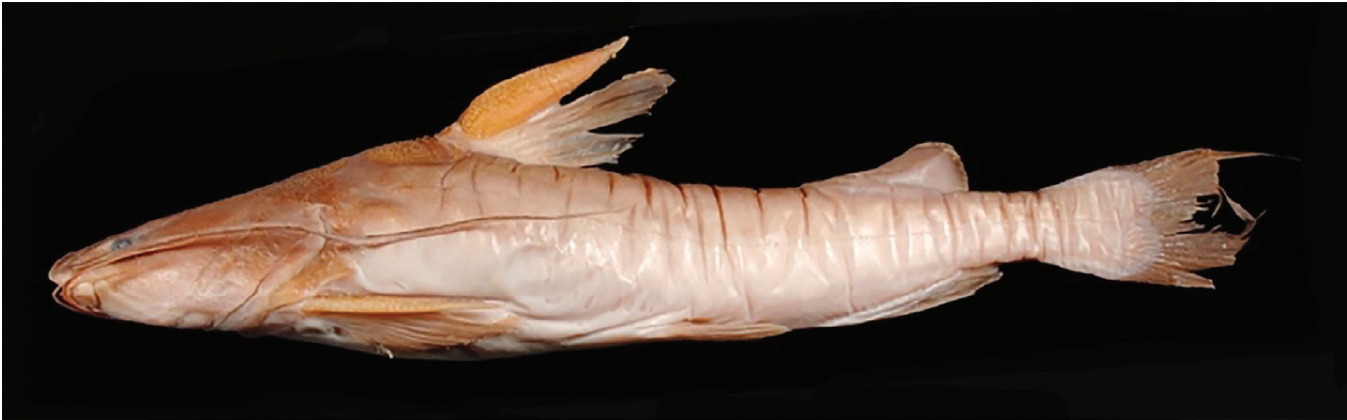

**Figure 19.** *Sciades parkeri* (Traill, 1832), ZMB 2990 [senior synonym of *Bagrus* (*Sciades*) *emphysetus*], coastal rivers from Guyana to northern Brazil, type species of the genus.

Betancur-R. et al. (2007) and Betancur-R. (2009), with results showing that the previous inclusion of *Paragenidens grandoculis* in *Potamarius* (Marceniuk and Menezes 2007, Marceniuk et al. 2012) was the result of morphological convergence (characters 64, 67, 68, 120), apparently the result of secondary invasion of freshwater environments (Marceniuk et al. 2019b, c).

*Sciades* Müller & Troschel, 1849

MP 100, BI 1, ML 100

(Figs 1–3, 16C, 19)

Type species: *Bagrus* (*Sciades*) *emphysetus* Müller & Troschel, 1849.

Diagnosis

Lateral horn of lateral ethmoid acute (11, 1 > 0), reversed in *Sciades couma* and *Sciades herzbergii*; fenestra delimited by lateral ethmoid and frontal very small or indistinct (17, 1 > 0); orbitosphenoid and pterosphenoid lateral expansions very narrow and long (65, 0 > 1), reversed in *Sciades couma* and *Sciades herzbergii*; parasphenoid very wide in ventral view (66, 0 > 1); otic capsule of moderate size, limited by prootic, pterotic, and exoccipital (70, 2 > 1), reversed in *Sciades couma* and *Sciades herzbergii*; space between transcapular process and otic capsule very large (89, 1 > 0), reversed in *Sciades couma* and *Sciades herzbergii*; one-half or less of interopercle posterior part contacting ventral margin of opercle (131, 1 > 0), reversed in *Sciades couma* and *Sciades herzbergii*; Müllerian ramus distal third straight (208, 1 > 0).

*Ambiguous optimization:* Mesethmoid median portion moderately wide (2, 1 > 2); autopalatine posterior portion conspicuously compressed (106, 0 > 1); articulation of autopalatine with lateral ethmoid mesoposteriorly oriented (110, 0 > 1); lateral margin of premaxilla with a very conspicuous concavity (123, 1 > 2); sesamoid bone I very long and subrectangular (145, 2 > 3); sesamoid bone II irregularly elongate (146, 0 > 1); first external branchiostegal ray proximally narrow and distally broad (147, 1 > 0); reversed in *Sciades couma* and *Sciades herzbergii*; complex formed by anterior and median nuchal plates shield-like (218, 0 > 1); reversed in *Sciades couma*, *Sciades herzbergii*, and *Sciades passany*; nuchal plate overlaying parieto-supraoccipital (220, 1 > 2); groove connecting posterior nostrils present (233, 0 > 1); reversed in *Sciades parkeri* and *Sciades proops*.

Included species

- Sciades couma* (Valenciennes, 1840)
- Sciades dowii* (Gill, 1863)
- Sciades herzbergii* (Bloch, 1794)
- Sciades passany* (Valenciennes, 1840)
- Sciades parkeri* (Traill, 1832)
- Sciades proops* (Valenciennes, 1840).

*Habitat and distribution:* Brackish and marine waters, eastern South America, from Colombia to east coast of Brazil and western South and Central America from Panama to Ecuador (Fig. 16).

Remarks

See Tribe Sciadeini Remarks.

Key to Old World genera and subtribes of Ariinae

- 12a. Two pairs of accessory tooth plates ... (*incertae sedis*) ..... *Netuma*
- 12b. One pair accessory tooth plates ..... 13
- 13a. Teeth in premaxilla cuspidate; teeth in dentary spatulate or cuspidate; autopalatine depressed and mesially angled in its anterior third ..... 14
- 13b. Teeth in premaxilla acute; teeth in dentary acicular; autopalatine cylindrical ..... 15
- 14a. Maxillary barbel absent; lateral ethmoid contacts frontal ... (Ariina) ..... *Batrachocephalus*
- 14b. Maxillary barbel present; lateral ethmoid not contacting frontal ... (Ariina) ..... *Ketengus*

|                                                                                                                                                                                                                                                                                                                                                                                                     |                       |
|-----------------------------------------------------------------------------------------------------------------------------------------------------------------------------------------------------------------------------------------------------------------------------------------------------------------------------------------------------------------------------------------------------|-----------------------|
| 15a. Maxillary barbel osseous; mental barbels absent ... (Ariina) .....                                                                                                                                                                                                                                                                                                                             | <i>Osteogeneiosus</i> |
| 15b. Maxillary barbel fleshy; mental barbels present .....                                                                                                                                                                                                                                                                                                                                          | 16                    |
| 16a. Fenestra delimited by lateral ethmoid and frontal distinct and very large; posterior process of cleithrum very short; ventral tip of subvertebral process spatulate .....                                                                                                                                                                                                                      | 17                    |
| 16b. Fenestra delimited by lateral ethmoid and frontal indistinct to moderately wide; posterior process of cleithrum moderately long to very long; ventral tip of subvertebral process split or acute .....                                                                                                                                                                                         | 22                    |
| 17a. Tooth band on fifth ceratobranchial very small; dorsal processes of upper (pharyngeal) tooth plate very long and conspicuous, connected by bony blade .....                                                                                                                                                                                                                                    | 18                    |
| 17b. Tooth band on fifth ceratobranchial very large to moderate; dorsal processes of upper (pharyngeal) tooth plate very short or absent, not connected by bony blade .....                                                                                                                                                                                                                         | 19                    |
| 18a. Accessory tooth plates absent; premaxilla wide and moderately long, its width more than three times its length; upper (pharyngeal) tooth plate very long and narrow, its width more than four times its length ... (Doiichthyina) .....                                                                                                                                                        | <i>Nedystoma</i>      |
| 18b. Accessory tooth plates present; premaxilla as long as wide; upper (pharyngeal) tooth plate long and narrow, its width three times its length ... (Doiichthyina) .....                                                                                                                                                                                                                          | <i>Doiichthys</i>     |
| 19a. Fenestra delimited by parieto-supraoccipital, pterotic and sphenotic present; ventral crest of hyomandibula absent; accessory crest connecting transverse and median crests associated with neural spine of fourth vertebra present .....                                                                                                                                                      | 20                    |
| 19b. Fenestra delimited by parieto-supraoccipital, pterotic and sphenotic absent; ventral crest of hyomandibula present; accessory crest connecting transverse and median crests associated with neural spine of fourth vertebra absent .....                                                                                                                                                       | 21                    |
| 20a. Temporal fossa moderate to very large; lateral line not bifurcated at caudal region, extending to dorsal caudal-fin lobe; superficial ventral ossification of Weberian apparatus keeled ... (Ariina) .....                                                                                                                                                                                     | <i>Cephalocassis</i>  |
| 20b. Temporal fossa very reduced; lateral line bifurcated at caudal region, extending to dorsal and ventral caudal-fin lobes; superficial ventral ossification of Weberian apparatus regularly arched ... (Ariina) .....                                                                                                                                                                            | <i>Hemipimelodus</i>  |
| 21a. Dorsal-fin spine without filament; optic foramen moderately large; posterior cranial fontanel wide and long (Marceniuk et al. 2012: fig. 2B) ... (Ariina) .....                                                                                                                                                                                                                                | <i>Hemiaris</i>       |
| 21b. Dorsal-fin spine prolonged into a filament; optic foramen very reduced; posterior cranial fontanel very wide and long (Marceniuk et al. 2012: figs 3A, 5B) ... (Doiichthyina) .....                                                                                                                                                                                                            | <i>Nemapteryx</i>     |
| 22a. Cleithrum lateral face very narrow; teeth on dentary restricted to mesial two-thirds; anterior portion of anterior cranial fontanel not delimited by dorsal expansion of orbitosphenoid; vomer arrow shaped ... (Ariina) .....                                                                                                                                                                 | <i>Cryptarius</i>     |
| 22b. Cleithrum lateral face moderately wide; teeth on dentary restricted to mesial one-third; anterior portion of anterior cranial fontanel partially or totally delimited by dorsal expansion of orbitosphenoid; vomer variable, but not arrow shaped .....                                                                                                                                        | 23                    |
| 23a. Posterior process of cleithrum very long, equal to vertical length of lateral face of cleithrum; ventral surfaces of parapophyses of fifth and sixth vertebrae conspicuously concave; anterior and posterior portions of basioccipital lateral process equally developed .....                                                                                                                 | 24                    |
| 23b. Posterior process of cleithrum very short to moderately long, less than one-third to about one-half vertical length of lateral face of cleithrum; ventral surfaces of parapophyses of fifth and sixth vertebrae straight; posterior portion of basioccipital lateral process extending further laterally than anterior portion .....                                                           | 26                    |
| 24a. Premaxilla narrow and very long, its length two to three times in width; Müllerian ramus slender ... (Doiichthyina) .....                                                                                                                                                                                                                                                                      | <i>Paracinetodus</i>  |
| 24b. Premaxilla very wide and short, as long as wide; Müllerian ramus robust .....                                                                                                                                                                                                                                                                                                                  | 25                    |
| 25a. Epioccipital not exposed dorsally; extrascapular subtriangular; accessory tooth plates present; upper (pharyngeal) tooth plate round, as wide as long ... (Doiichthyina) .....                                                                                                                                                                                                                 | <i>Cinetodus</i>      |
| 25b. Epioccipital exposed dorsally; extrascapular subquadrangular; accessory tooth plates absent; upper (pharyngeal) tooth plate oval, its width twice in its length ... (Doiichthyina) .....                                                                                                                                                                                                       | <i>Pachyula</i>       |
| 26a. Lateral line at caudal region bifurcated, reaching dorsal and ventral caudal-fin lobes; accessory tooth plates with molariform teeth (except <i>Arius manillensis</i> and <i>Arius oetik</i> ); vomer anterior margin very pronounced and acute; extrascapular subrectangular .....                                                                                                            | 27                    |
| 26b. Lateral line at caudal region not bifurcated, reaching dorsal caudal-fin lobe (except <i>Neoarius hainesi</i> ); accessory tooth plates with needle-like teeth; vomer anterior margin weakly pronounced and serrated (except <i>Potamosilurus</i> and <i>Neoarius hainesi</i> ); extrascapular subquadrangular or subtriangular (except <i>Brustarius</i> and <i>Pararius proximus</i> ) ..... | 31                    |
| 27a. Vomerine tooth plates present, entirely free from vomer; otolith posterior margin irregular; gas bladder lateral diverticula present; urohyal posterolateral processes as long as or longer than distal portion of bone ... ( <i>incertae sedis</i> ) .....                                                                                                                                    | <i>Plicofollis</i>    |
| 27b. Vomerine tooth plates absent; otolith posterior margin rounded; gas bladder lateral diverticula absent; urohyal posterolateral processes almost as long as distal portion of bone .....                                                                                                                                                                                                        | 28                    |
| 28a. Fenestra delimited by lateral ethmoid and frontal very small or indistinct; second dorsal cleithral process posteriorly directed and parallel to posterior process; pterotic mesial border with parieto-supraoccipital as long as anterior border with sphenotic .....                                                                                                                         | <i>Kyataphisa</i>     |



|                                                                                                                                                                                                                                                                                  |                        |
|----------------------------------------------------------------------------------------------------------------------------------------------------------------------------------------------------------------------------------------------------------------------------------|------------------------|
| 28b. Fenestra delimited by lateral ethmoid and frontal distinct and moderately wide; second dorsal cleithral process dorsally directed and parallel to first dorsal process; pterotic mesial border with parieto-supraoccipital longer than anterior border with sphenotic ..... | 29                     |
| 29a. Transcapular process depressed; bony blade connecting posterolateral processes of urohyal absent .....                                                                                                                                                                      | <i>Jayaramichthys</i>  |
| 29b. Transcapular process cylindrical or columnar; bony blade connecting posterolateral processes of urohyal present .....                                                                                                                                                       | 30                     |
| 30a. Orbitosphenoid and pterosphenoid lateral expansions as two short and wide leaf-like processes ... (Ariina) .....                                                                                                                                                            | <i>Betancurichthys</i> |
| 30b. Orbitosphenoid and pterosphenoid lateral expansions as slight projections with straight lateral faces ... (Ariina) .....                                                                                                                                                    | <i>Arius</i>           |
| 31a. Posterior cranial fontanel absent .....                                                                                                                                                                                                                                     | 32                     |
| 31b. Posterior cranial fontanel present .....                                                                                                                                                                                                                                    | 33                     |
| 32a. Temporal fossa absent ... (Ariina) .....                                                                                                                                                                                                                                    | <i>Hexanemichthys</i>  |
| 32b. Temporal fossa present .....                                                                                                                                                                                                                                                | 35                     |
| 33a. Accessory tooth plates small, oval to rounded; connection between posterior process of exoccipital and Müllerian ramus by suture; autopalatine posterior portion very compressed ... (Doiichthyina) .....                                                                   | <i>Blekeriella</i>     |
| 33b. Accessory tooth plates large, oval to subtriangular; connection between posterior process of exoccipital and Müllerian ramus by ligaments; autopalatine posterior portion only slightly compressed .....                                                                    | 34                     |
| 34a. Lateral margins of orbitosphenoid progressively diverging anteriorly ... (Doiichthyina) .....                                                                                                                                                                               | <i>Pararius</i>        |
| 34b. Lateral margins of orbitosphenoid uniformly parallel for entire length ... (Doiichthyina) .....                                                                                                                                                                             | <i>Brustarius</i>      |
| 35a. Accessory tooth plates absent ... (Doiichthyina) .....                                                                                                                                                                                                                      | <i>Potamosilurus</i>   |
| 35b. Accessory tooth plates present .....                                                                                                                                                                                                                                        | 36                     |
| 36a. Posterior branches of mesethmoid very long, delimiting one-half length of anterior cranial fontanel; lateral expansions of orbitosphenoid and pterosphenoid absent ... (Doiichthyina) .....                                                                                 | <i>Acerichthys</i>     |
| 36b. Posterior branches of mesethmoid short, delimiting less than one-half length of anterior cranial fontanel; lateral expansions of orbitosphenoid and pterosphenoid present .....                                                                                             | 37                     |
| 37a. Accessory tooth plates large, oval to subtriangular .....                                                                                                                                                                                                                   | 38                     |
| 37b. Accessory tooth plates small, transversely elongate and narrow or oval to round .....                                                                                                                                                                                       | 39                     |
| 38a. Margin of parieto-supraoccipital process contacting nuchal plate convex; lateral margins of orbitosphenoid progressively diverging anteriorly ... (Ariina) .....                                                                                                            | <i>Pseudosciades</i>   |
| 38b. Margin of parieto-supraoccipital process contacting nuchal plate concave or notched; lateral margins of orbitosphenoid uniformly parallel for entire length ... ( <i>incertae sedis</i> ) .....                                                                             | <i>Carlarius</i>       |
| 39a. Accessory tooth plates narrow and oval to rounded ... (Doiichthyina) .....                                                                                                                                                                                                  | <i>Brustarius</i>      |
| 39b. Accessory tooth plates transversely elongate and narrow .....                                                                                                                                                                                                               | 40                     |
| 40a. Thirty-nine or more caudal vertebrae; mesial one-fourth of fourth epibranchial robust, almost as wide as long ... (Doiichthyina) .....                                                                                                                                      | <i>Cochlefelis</i>     |
| 40b. Thirty-eight or fewer caudal vertebrae; mesial one-fourth of fourth epibranchial thin, its width about twice its length .....                                                                                                                                               | 41                     |
| 41a. Posterior cranial fontanel wide and long; articulation of autopalatine with lateral ethmoid slightly displaced to posterior portion of bone ... (Doiichthyina) .....                                                                                                        | <i>Papuaris</i>        |
| 41b. Posterior cranial fontanel reduced to a small opening or relatively narrow and long; articulation of autopalatine with lateral ethmoid in middle of bone ... (Doiichthyina) .....                                                                                           | <i>Nearius</i>         |

### Tribe Ariini Bleeker, 1858

MP 97, BI 1, ML 91

(Figs 1–3)

Type genus: *Arius* Valenciennes, 1840.

Diagnosis (all of ambiguous optimization)

Vomerine tooth plates transversely elongate (56, 1 > 0), state 2 in *Brustarius* (except *Brustarius utarus*) and *Pararius mastersi*; sesamoid bone I short and triangular (145, 1 > 0), state 1 in Ariina, *Betancurichthys*, *Blekeriella*, *Cinetodus*, *Doiichthys*, *Nedystoma*, *Nemapteryx*, and *Pachyula*.

Included subtribes

*Incertain sedis* Ariini  
Ariina Bleeker, 1858  
Doiichthyina Weber, 1913.

### Remarks

The recognition of the Tribe Ariini corroborates the monophyletic grouping found in the molecular study of *Betancur-R.* (2009), separating the Old World fauna (a monophyletic group within Ariinae, the Tribe Ariini) from the fauna found in the New World (a paraphyletic group within Ariinae). Ariines exhibit a large amount of morphological convergence in taxa occupying similar habitats (e. g., forms restricted to freshwater in general have skulls with more conspicuous openings vs. predominantly marine forms with smaller or no cranial openings).

### Ariini incertae sedis

(Figs 1–3, 20)

Included genera

*Carlarius* Marceniuk & Menezes, 2007  
*Netuma* Bleeker, 1858  
*Plicofollis* Kailola, 2004.

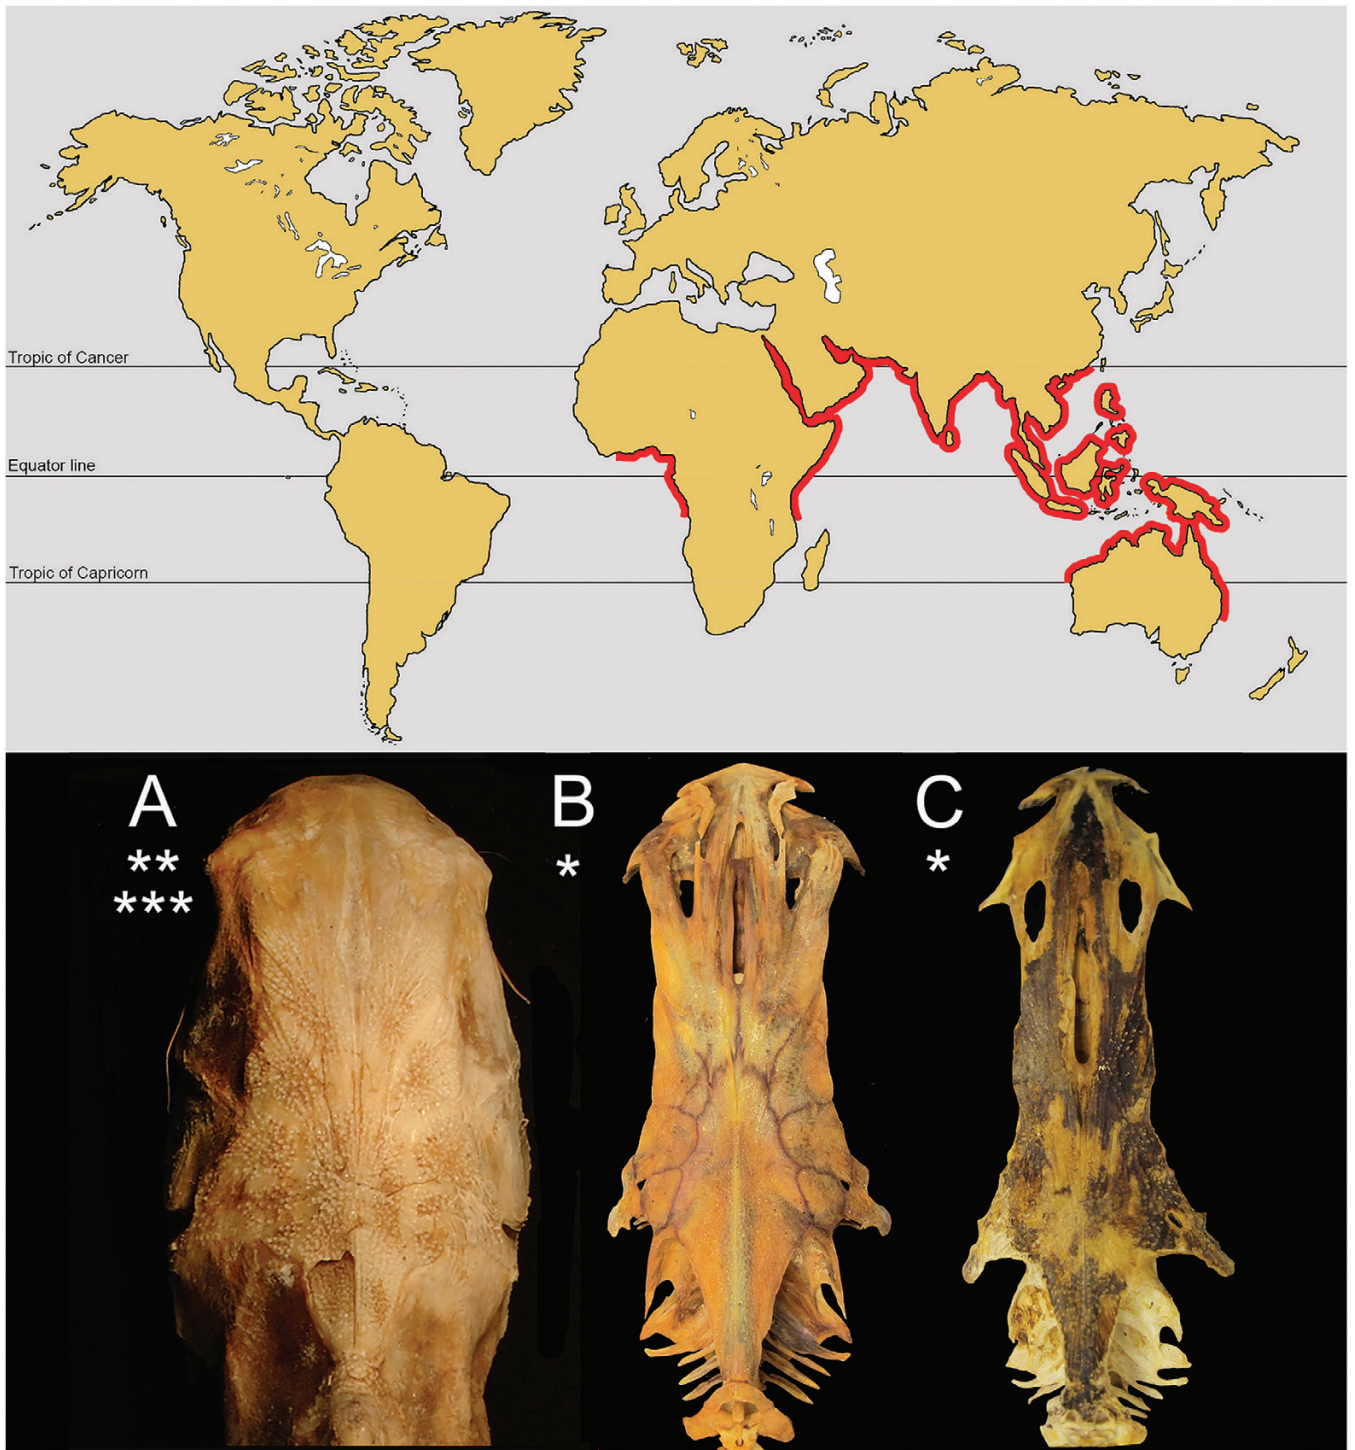

**Figure 20.** Representative skulls, in dorsal view, and distribution of the Ariini *incertae sedis*. A, *Carlarius heudelotii*, MNHN B-0689. B, *Netuma bilineata*, AUM 47559. C, *Plicofollis argyropleuron*, AUM 44750. \* marine, \*\* brackish water, \*\*\* freshwater.

#### Remarks

The three genera listed here are each monophyletic and all fall within the Ariini, but their positions within that clade differ markedly among the MP, BI, and ML analyses. As such, they are treated here as members of the Ariini, but not included within either of the named subtribes.

*Carlarius* Marceniuk & Menezes, 2007

MP 100, BI 1, ML 100

(Figs 1–3, 20A, 21)

*Type species:* *Arius heudelotii* Valenciennes, 1840.

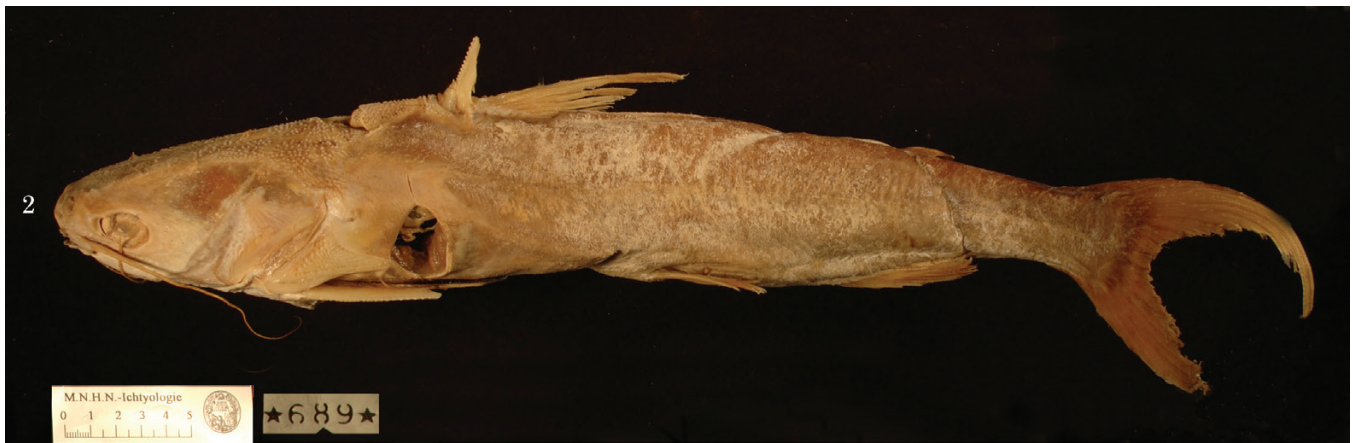

Figure 21. *Carlarius heudelotii*, MNHN B-0689, western-central Africa, type species of the genus.

#### Diagnosis

Mesial border of pterotic with parieto-supraoccipital longer than anterior border with sphenotic (36, 0 > 1); epioccipital dorsally visible (41, 0 > 1); vomer lateral processes very narrow (53, 0 > 1); tooth plates associated with vomer absent (55, 1 > 0); first external branchiostegal ray proximally narrow and distally broad (147, 1 > 0); posterolateral processes of urohyal almost as long as or longer than distal portion of bone (162, 1 > 0).

*Ambiguous optimization:* Opercle posterior portion not well developed posteriorly (129, 1 > 0), state 1 in *Carlarius heudelotii*.

#### Included species

*Carlarius gigas* (Boulenger, 1911) \* *sedis mutabilis*  
*Carlarius heudelotii* Valenciennes, 1840  
*Carlarius latiscutatus* Günther, 1864  
*Carlarius parkii* Günther, 1864.

*Habitat and distribution:* Fresh and brackish waters, western Africa (Fig. 20).

#### Remarks

The total-evidence analysis corroborates the monophyly and species composition of *Carlarius* as uncovered previously by morphological and molecular studies (Marceniuk and Menezes 2007, Betancur-R. 2009, Marceniuk et al. 2012), but without consensus regarding its relationships in the MP, BI, and ML analyses.

*Netuma* Bleeker, 1858

MP 100, BI 1, ML 100

(Figs 1–3, 20B, 22)

*Type species:* *Bagrus netuma* Valenciennes, 1840.

#### Diagnosis

Mesethmoid medial notch indistinct, obscured by bone deposition (1, 1 > 2); posterior branch of lateral ethmoid depressed (13, 0 > 1); posterior cranial fontanel reduced to small opening (27, 1 > 0); vomer lateral processes very narrow (53, 0 > 1); accessory

tooth plates two pairs (59, 0 > 1); exoccipital posterior process not supporting Müllerian ramus (94, 1 > 0); dorsal crest of premaxilla beginning between lateral one-third or one-half of anterior margin (124, 0 > 1); metapterygoid anterior process truncate (138, 0 > 1); first external branchiostegal ray narrow proximally and broad distally (147, 1 > 0); posterolateral processes of urohyal posteriorly oriented, forming angle less than 60° (161, 0 > 1); posterior portion of second basibranchial short and wide (167, 2 > 3); third basibranchial chalice shaped (168, 0 > 1); anterior process of first hypobranchial at middle of bone (174, 0 > 1); lateral margin of third pharyngobranchial well developed and acute (193, 0 > 1); adipose-fin base very short (222, 2 > 3); adipose-fin origin vertically above posterior one-half of anal fin (223, 1 > 2); gas bladder lateral diverticula present (243, 0 > 1).

*Ambiguous optimization:* Mesethmoid median portion moderately wide (2, 2 > 1); lateral line bifurcated, reaching dorsal and ventral caudal-fin lobes (247, 1 > 2).

#### Included species

*Netuma bilineata* Valenciennes, 1840  
*Netuma* aff. *bilineata*  
*Netuma patriciae* Takahashi, Kimura & Motomura, 2019  
*Netuma thalassina* Rüppell, 1837.

*Habitat and distribution:* Brackish and marine waters, eastern Africa, South and Southeast Asia, southern New Guinea, and northern Australia (Fig. 20).

#### Remarks

*Netuma* is a well-defined genus that was determined to be monophyletic in previous morphological and molecular studies (Kailola 2004, Marceniuk and Menezes 2007, Betancur-R. 2009, Marceniuk et al. 2012), a condition corroborated here, but without consensus of its relationships in the MP, BI, and ML analysis.

*Plicofollis* Kailola, 2004

MP 92, BI 1, ML 100

(Figs 1–3, 20C, 23)

*Type species:* *Arius argyropleuron* Valenciennes, 1840.



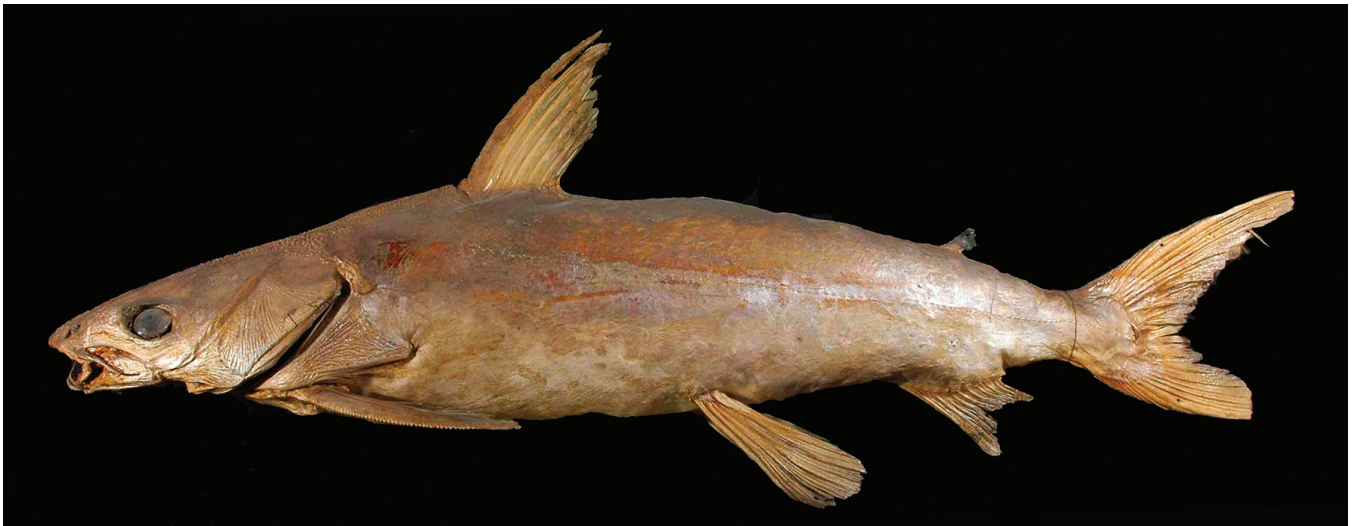

**Figure 22.** *Netuma thalassina* (Rüppell, 1837), SMF 2627 (senior synonym of *Bagrus netuma*), Red Sea, Indo-West Pacific, East Africa, Persian Gulf east to Philippines, north to southern China, south to Australia, type species of the genus.

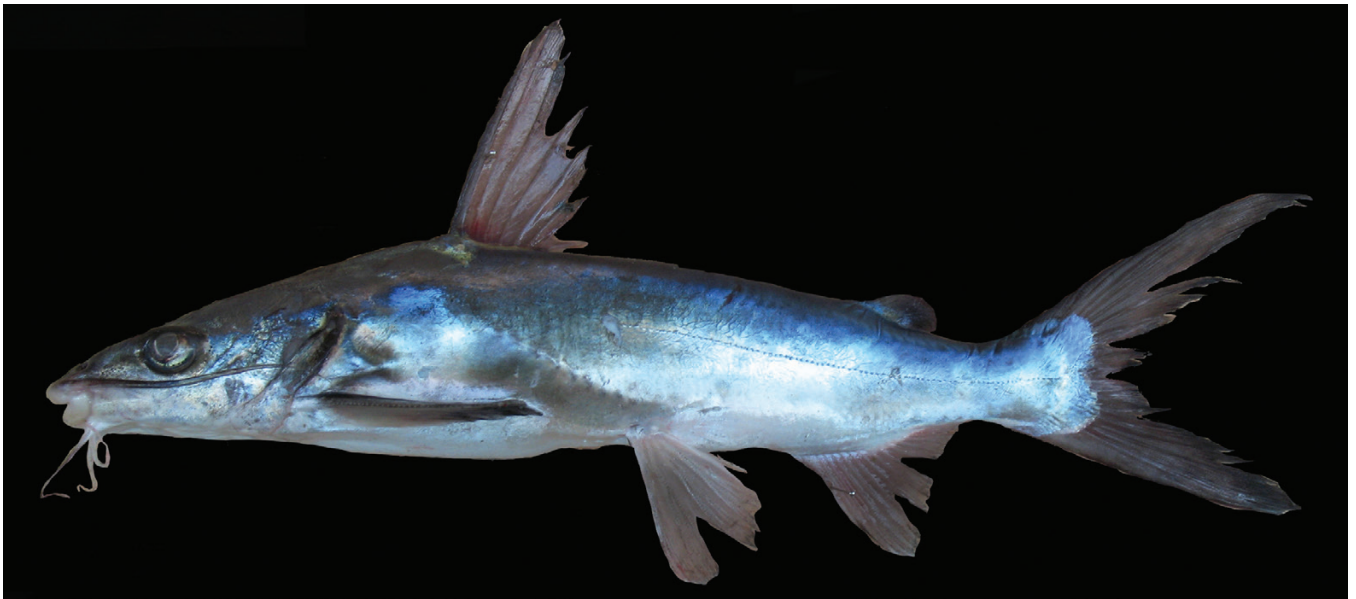

**Figure 23.** *Plicofollis argyropleuron*, South and Southeast Asia, southern New Guinea, and northern Australia, photograph by Ricardo Betancur-R., type species of the genus.

#### Diagnosis

Posterior branch of lateral ethmoid depressed (13, 0 > 1); parasphenoid very wide in ventral view (66, 0 > 1); maxilla with mesial and lateral margins parallel for proximal two-thirds, converging in distal one-third, distal margin truncate (102, 2 > 0); posterior margin of interopercle straight and inclined (130, 0 > 1); metapterygoid one and one-half times longer than deep in perpendicular section (135, 1 > 2); metapterygoid anterior process truncate (138, 0 > 1); anterior portion of anterior ceratohyal very thick (152, 0 > 1); posterolateral processes of urohyal more than one-half as long as distal portion of bone (162, 2 > 3); gas bladder lateral diverticula present (243, 0 > 1).

*Ambiguous optimization:* Mesethmoid median portion moderately wide (2, 0 > 1); extension of diagonal crest associated with

posterior branch of parapophysis of complex vertebra short, reaching transverse crest (199, 1 > 0); opening delimited by epioccipital posterior process and crests of sustentaculum of Weberian apparatus moderate (203, 2 > 1).

#### Included species

*Plicofollis argyropleuron* Valenciennes, 1840  
*Plicofollis* aff. *argyropleuron* sp 1  
*Plicofollis* aff. *argyropleuron* sp 2  
*Plicofollis crossocheiros* (Bleeker, 1846) \* *sedis mutabilis*  
*Plicofollis dussumieri* Valenciennes, 1840  
*Plicofollis layardi* Günther, 1866  
*Plicofollis* aff. *layardi*  
*Plicofollis magatensis* Herre, 1926 \*  
*Plicofollis nella* Valenciennes, 1840

*Plicofollis platystomus* Day, 1877

*Plicofollis polystaphylodon* Bleeker, 1846

*Plicofollis* aff. *polystaphylodon*

*Plicofollis tenuispinis* Day, 1877

*Plicofollis tonggol* Bleeker, 1846.

**Habitat and distribution:** Brackish and marine waters, eastern Africa, South and Southeast Asia, southern New Guinea, and northern Australia (Fig. 20).

#### Remarks

*Plicofollis* was established by Kailola (2004) based on the examination of *Plicofollis argyroleuron*, *Plicofollis polystaphylodon*, and *Plicofollis nella*. Monophyly of the genus was ratified, and its species composition revised, based on morphological and molecular data (Marceniuk and Menezes 2007, Betancur-R. 2009, Marceniuk et al. 2012, 2017c). The results of the total-evidence analysis corroborate the monophyly of the genus, with the addition of four currently unnamed species, but without consensus on its relationships within the Ariinae (Betancur-R. 2009).

In addition to the diagnostic character states listed above, all species of *Plicofollis* except *Plicofollis platystomus* share the following morphological states. On the basis of this suite of characters, we interpret *Plicofollis platystomus* as the sister to all other species of *Plicofollis*. Posterior cranial fontanel reduced to a small opening (27, 1 > 0); epioccipital dorsally visible (41, 0 > 1); general shape of vomer arrow shaped (49, 1 > 2); vomer lateral processes short (52, 0 > 1); anterior portion of posterior process of vomer as narrow as distal portion (54, 0 > 1); accessory tooth plates large, longitudinally elongate (60, ? > 4); orbitosphenoid and pterosphenoid lateral expansions slight projections with straight lateral faces (65, 0 > 3); lachrymal-antorbital narrow (100, 0 > 1); premaxilla narrow and very long, its length two to three times in width (120, 1 > 2); anteroventral margin of opercle concave or almost straight (128, 0 > 1); anterior portion of interopercle compressed and bifurcate (132, 0 > 1); interopercle subrectangular (134, 0 > 2); posterolateral processes of urohyal short (160, 1 > 0); second basibranchial short and narrow (167, 2 > 4); contact face between first epibranchial and first pharyngobranchial very conspicuous (177, 0 > 1); posterior margin of first epibranchial straight (181, 0 > 1); margin of lateral uncinat process of third epibranchial notched (185, 0 > 1); first pharyngobranchial large and depressed (190, 0 > 1). The following additional morphological character states are shared by species of *Plicofollis* except *Plicofollis platystomus*, but are of ambiguous optimization. Tooth plates associated with vomer present (55, 0 > 1); contact face for articulation of transcapular process with basioccipital small and columnar (85, 1 > 0); exoccipital posterior process not supporting Müllerian ramus (94, 1 > 0); dorsal crest of hyomandibula long and low (141, 1 > 0); posterior end of urohyal truncated (158, 0 > 2); 15 or more ribs (213, 0 > 1); adipose-fin base very short (222, 2 > 3); adipose-fin origin vertically above posterior one-half of anal fin (223, 1 > 2).

#### Subtribe Ariina Bleeker, 1858

(Figs 1–3, 24)

##### Diagnosis (all of ambiguous optimization)

Posterior cranial fontanel formed by frontals and parieto-supraoccipital (25, 1 > 0), state 1 in *Arius leptanotacanthus*, *Arius nenga*, *Osteogeneiosus*, and *Pseudosciades*; anterior margin of otolith

straight or slightly irregular (71, 0 > 1), state 0 in *Hemiarius stormii*; otolith posterior margin rounded (74, 1 > 0), state 0 in *Hemiarius stormii*; orientation of exoccipital bony crest perpendicular to vertebral column and directed posteriorly (92, 0 > 1), state 0 in *Hexanematichthys*; sesamoid bone I very long and subtriangular (145, 0 > 1), state 2 in *Osteogeneiosus*; 14 or fewer ribs (213, 1 > 0), state 1 in *Hexanematichthys*; second dorsal cleithral process dorsally directed and parallel to first dorsal process (226, 0 > 1), state 0 in *Arius* aff. *nenga*, *Batrachocephalus*, and *Hexanematichthys*.

#### Included genera

*Arius* Valenciennes, 1840

*Batrachocephalus* Bleeker, 1846

*Betancurichthys* gen. nov.

*Cephalocassis* Bleeker, 1852

*Cryptarius* Kailola, 2004

*Jayaramichthys* gen. nov.

*Kyataphisa* gen. nov.

*Hemiarius* Bleeker, 1862

*Hemipimelodus* Bleeker, 1857

*Hexanematichthys* Bleeker, 1858

*Ketengus* Bleeker, 1846

*Osteogeneiosus* Bleeker, 1846

*Pseudosciades* gen. nov.

#### Remarks

The recognition of the subtribe Ariina corroborates the results of a previous molecular study (Betancur-R. 2009), which uncovered a distinct lineage of the Ariinae in Asia vs. that in Papua New Guinea and Australia (Doiichthyina).

#### *Arius* Valenciennes, 1840

(Figs 1–2, 24A–25)

**Type species:** *Pimelodus arius* Hamilton, 1822.

#### Diagnosis

Bony bridge formed by lateral ethmoid and frontal cylindrical and thin (16, 0 > 1); frontal mesial laminar projection absent (23, 1 > 0); accessory tooth plates ventral to orbitosphenoid and metapterygoid (62, 0 > 1); orbitosphenoid and pterosphenoid lateral expansions slight projections with sinuous lateral face (65, 0 > 2); autopalatine very compressed at articulation with lateral ethmoid (108, 0 > 1); dorsal crest of premaxilla beginning between lateral one-third or one-half of anterior margin (124, 0 > 1); lateral margin of third pharyngobranchial well developed and acute (193, 0 > 1).

**Ambiguous optimization:** Müllerian ramus bone blade evident only in basal third (206, 2 > 1).

#### Included species

*Arius acutirostris* Day, 1877 \* *sedis mutabilis*

*Arius africanus* Günther, 1867 \* *sedis mutabilis*

*Arius arenarius* Müller & Troschel, 1849 \* *sedis mutabilis*

*Arius arius* Hamilton, 1822

*Arius brunellii* Zollezi, 1939 \* *sedis mutabilis*

*Arius burmanicus* Day, 1870 \* *sedis mutabilis*

*Arius dispar* Herre, 1926



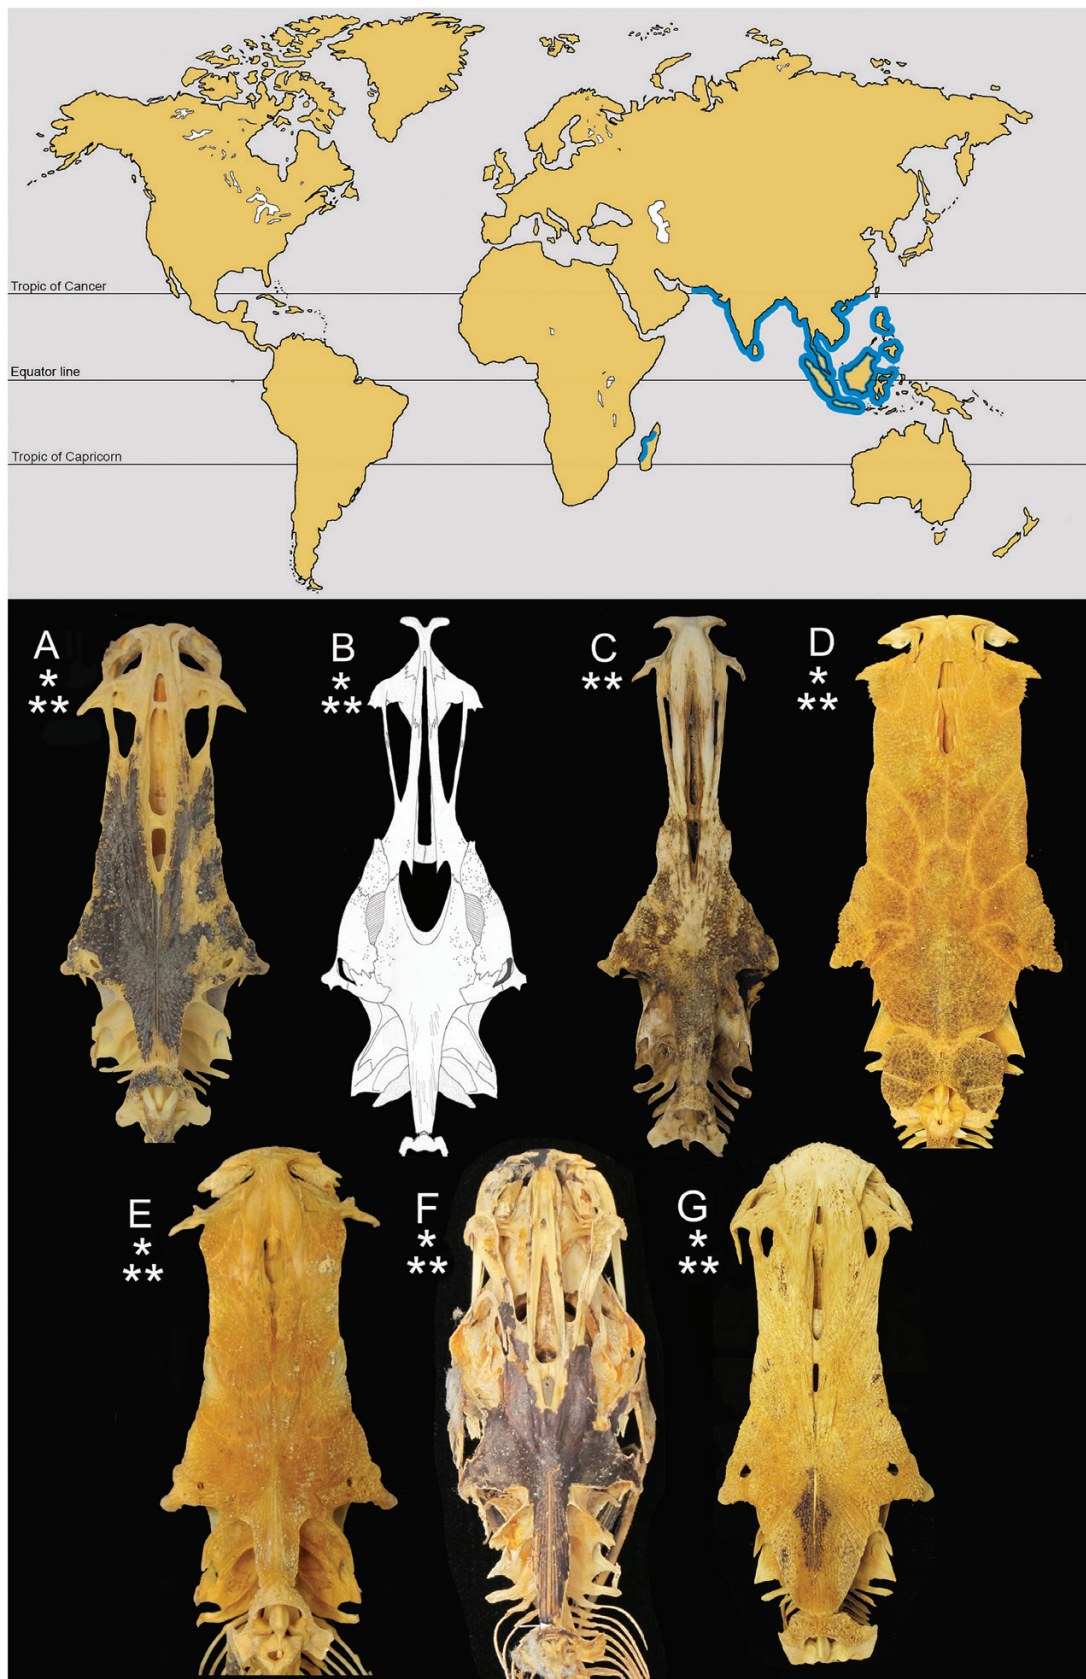

**Figure 24.** Representative skulls, in dorsal view, and distribution of the subtribe Ariina. A, *Arius maculatus*, AUM 44875. B, *Cephalocassis melanocheir*, CAS 49426. C, *Cryptarius truncatus*, AUM 50243. D, *Hexanematichthys sagor*, AUM 50242. E, *Kyataphisa nenga*, AUM 46280. F, *Osteogeneiosus militaris*, AUM 44880. G, *Pseudosciades sona*, AUM 44861. \* marine, \*\* brackish water, \*\*\* freshwater.



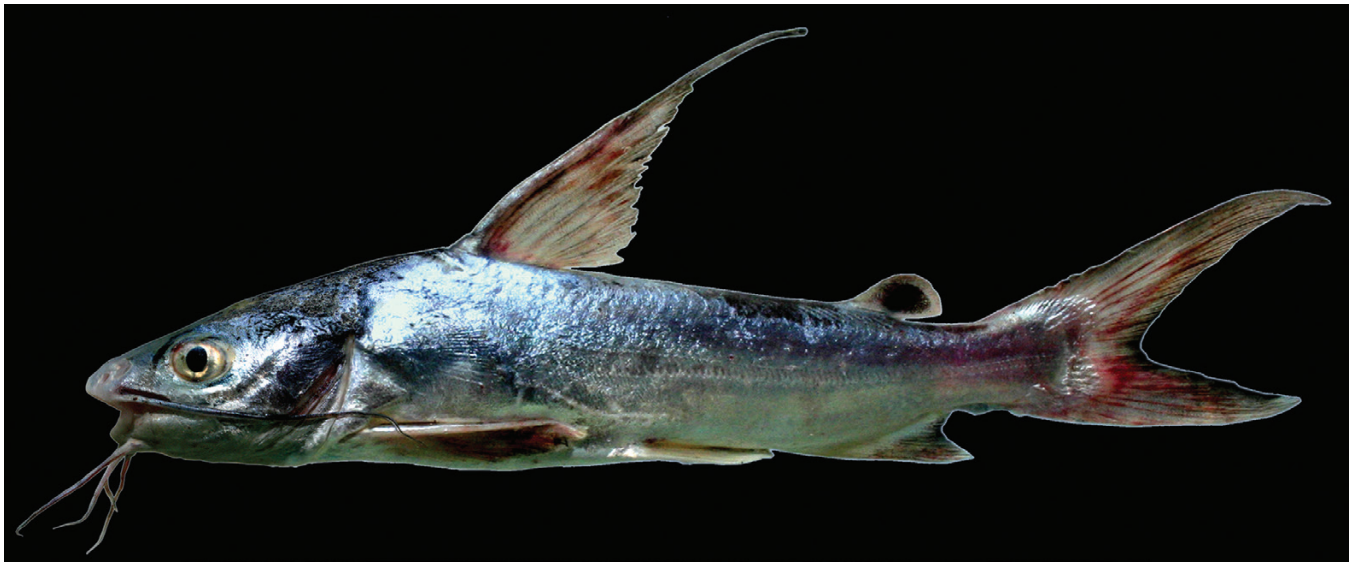

**Figure 25.** *Arius arius*, Indo-West Pacific, photograph by Ricardo Betancur-R., type species of the genus.

*Arius gagora* Hamilton, 1822

*Arius jatius* Hamilton, 1822 \* *sedis mutabilis*

*Arius jella* Day, 1877 \* *sedis mutabilis*

*Arius leptanotacanthus* Bleeker, 1849 *sedis mutabilis*

*Arius macronotacanthus* Bleeker, 1846 \* *sedis mutabilis*

*Arius maculatus* Thunberg, 1792

*Arius malabaricus* Day, 1877 \* *sedis mutabilis*

*Arius manillensis* Valenciennes, 1840

*Arius microcephalus* Bleeker, 1855 \* *sedis mutabilis*

*Arius nenga* Hamilton, 1822 *sedis mutabilis*

*Arius* aff. *nenga* *sedis mutabilis*

*Arius oetik* Bleeker, 1846

*Arius subrostratus* Valenciennes, 1840 \* *sedis mutabilis*

*Arius venosus* Valenciennes, 1840 \* *sedis mutabilis*.

**Habitat and distribution:** Fresh and brackish waters, eastern Africa and South to Southeast Asia (Fig. 24).

#### Remarks

The genus *Arius* undoubtedly has the most complex taxonomy of the Ariidae, serving to accommodate taxa without clear affinities elsewhere (Marceniuk and Menezes 2007). Recent morphological studies have recognized the monophyly of *Arius* with the inclusion of *Betancurichthys madagascariensis* (Marceniuk and Menezes 2007, Marceniuk et al. 2012), an arrangement not supported by Betancur-R. (2009), a molecular study that does not recognize the monophyly of *Arius*. The MP and ML analysis supports the monophyly of *Arius* without *Betancurichthys madagascariensis*.

***Batrachocephalus* Bleeker, 1846**

(Figs 1–3, 26)

**Type species:** *Batrachocephalus ageneiosus* Bleeker, 1846.

#### Diagnosis

Mesethmoid median portion very wide (2, 0 > 2); nasal fan shaped (19, 0 > 2); posterior cranial fontanel absent (26,

1 > 0); epiphyseal bar indistinct (28, 0 > 1); sphenotic long and narrow (35, 1 > 0); posterior portion of anterior ceratohyal columnar and very thick (151, 0 > 1); posterior ceratohyal long (153, 0 > 1); anterior margin of urohyal not notched (154, 0 > 1); second dorsal cleithral process posteriorly directed and parallel to posterior process (226, 1 > 0); maxillary barbel absent (234, 0 > 1).

**Ambiguous optimization:** Anteroventral portion of opercle subtriangular (127, 2 > 3).

#### Included species

*Batrachocephalus mino* Hamilton, 1822.

**Habitat and distribution:** Brackish and marine waters, South and Southeast Asia (Fig. 24).

#### Remarks

The MP analysis of the data matrix corroborates previous morphological studies (Marceniuk and Menezes 2007, Marceniuk et al. 2012), both in terms of species composition and the relationship of *Batrachocephalus* with *Ketengus* plus *Osteogeneiosus*, which contrasts with the hypothesis of Kailola (2004),

***Betancurichthys* gen. nov.**

(Figs 1–3, 27)

**ZooBank registration:** urn:lsid:zoobank.org:act:CF91C445-9AA0-4852-8291-6F9FD57C9CD2.

**Type species:** *Arius madagascariensis* Vaillant, 1894.

#### Diagnosis

Bony bridge formed by lateral ethmoid and frontal cylindrical and thin (16, 0 > 1); frontal mesial laminar projection absent (23, 1 > 0); posterior cranial fontanel formed by frontals and parieto-supraoccipital (25, 1 > 0); otolith posterior margin rounded (74, 1 > 0); dorsal crest of premaxilla beginning between lateral one-third or one-half of anterior margin (124, 0 > 1); third basibranchial chalice shaped (168, 0 > 1); dorsal-fin spine prolonged into filament (221, 0 > 1).

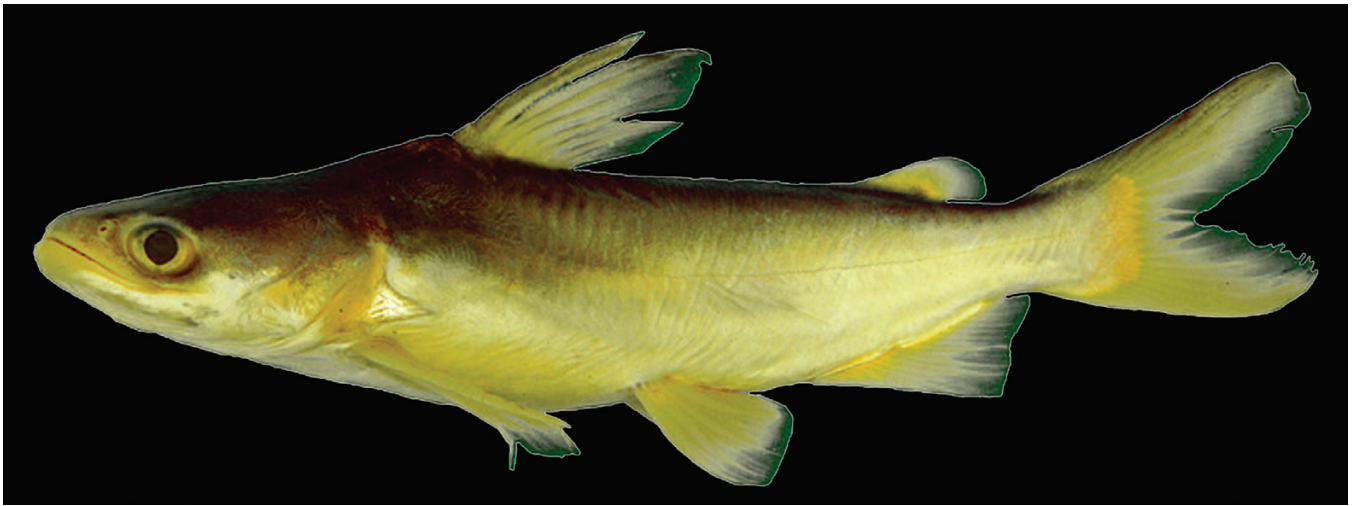

**Figure 26.** *Batrachocephalus mino*, FMNH 68052 (senior synonym of *Batrachocephalus ageneiosus*), Indo-West Pacific, type species of the genus.

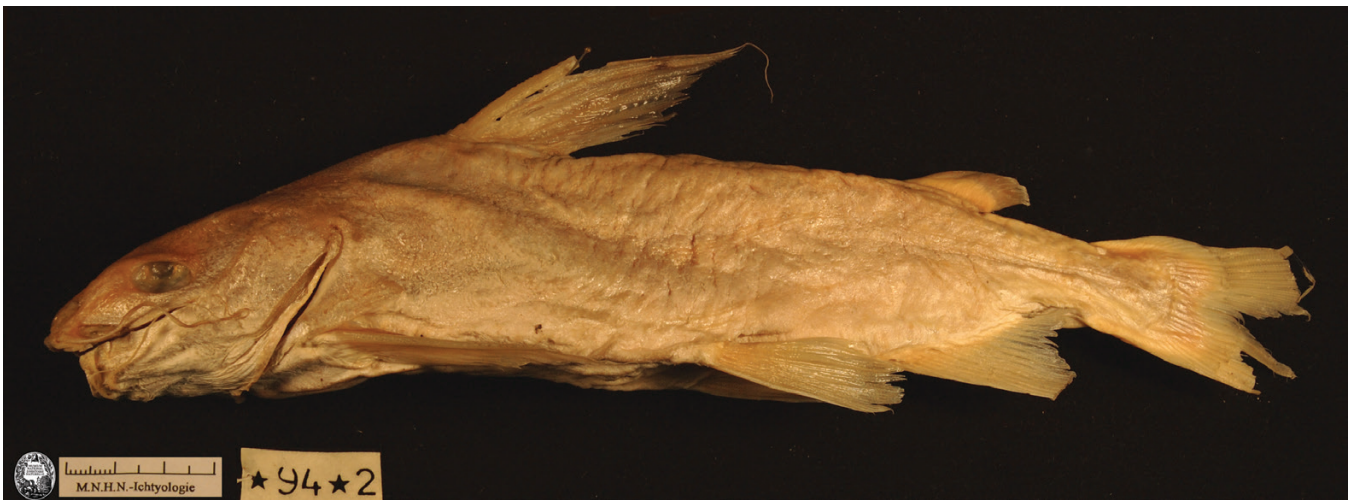

**Figure 27.** *Betancurichthys madagascariensis*, MNHN 1894-0002, western Madagascar, type species of the genus.

*Ambiguous optimization:* Sesamoid bone I very long and subtriangular ( $145, 0 > 1$ ).

#### *Etymology*

Named after Colombian ichthyologist Ricardo Betancur-R. for his dedication to the knowledge of the taxonomy, evolution, and biogeography of marine catfishes. Gender: masculine.

#### *Included species*

*Betancurichthys festinus* Ng & Sparks, 2003 \* *sedis mutabilis*  
*Betancurichthys madagascariensis* Vaillant, 1894  
*Betancurichthys uncinatus* Ng & Sparks, 2003 \* *sedis mutabilis*.

*Habitat and distribution:* Fresh and brackish waters, western Madagascar (Fig. 24).

#### *Remarks*

The genus *Betancurichthys* was established to accommodate species endemic to Madagascar, in the western Indian Ocean, corroborating molecular results presented by [Betancur-R.](#)

(2009). Its inclusion in the Ariina is supported by the BI and ML analyses. The inclusion of *Betancurichthys festinus* and *Betancurichthys uncinatus* in the genus is provisional, based on the distribution and life habits of the species restricted to freshwater in Madagascar.

*Cephalocassis* Bleeker, 1852

(Figs 1–3, 24B, 28)

*Type species:* *Arius melanocheir* Bleeker, 1852.

#### *Diagnosis*

Posterior branches of mesethmoid narrow ( $6, 0 > 1$ ); posterior branches of mesethmoid parallel throughout their entire extension ( $7, 0 > 1$ ); anterior portion of anterior cranial fontanel not delimited by dorsal expansion of orbitosphenoid ( $24, 1 > 0$ ); fenestra delimited by parieto-supraoccipital, pterotic and sphenotic present ( $34, 0 > 1$ ); parieto-supraoccipital process base almost as narrow as posterior portion ( $46, 1 > 0$ ); vomer anterior margin



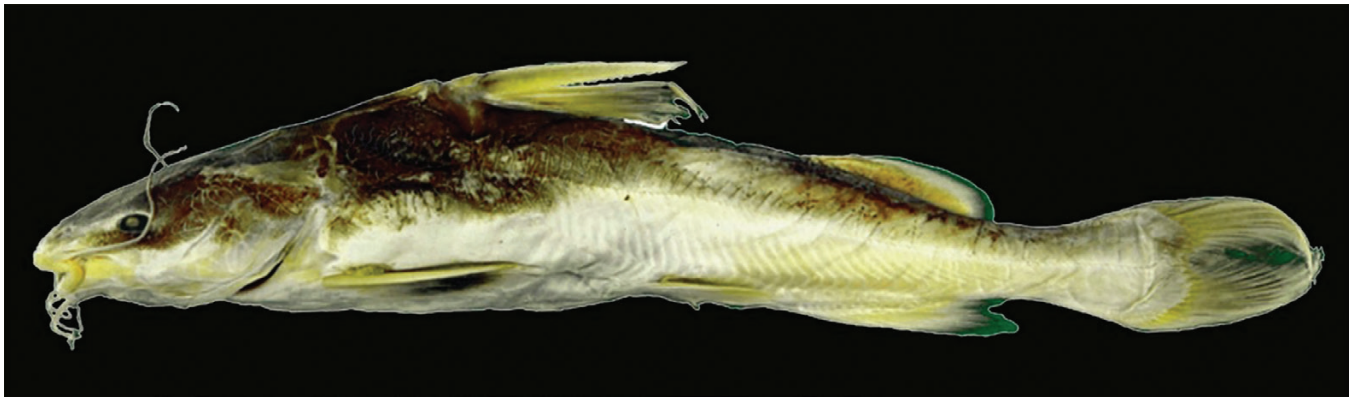

**Figure 28.** *Cephalocassis melanochir*, USNM 230311, Indonesia and Malaysia, type species of the genus.

very pronounced and acute (50, 0 > 1); tooth plates associated with vomer absent (55, 1 > 0); lateral expansions of orbito-sphenoid and pterosphenoid absent (64, 1 > 0); optic foramen very reduced (67, 1 > 2); basioccipital lateral process absent (82, 1 > 0); space between transcapular process and otic capsule very small (89, 1 > 2); teeth on dentary restricted to mesial two-thirds (116, 1 > 0); premaxilla narrow and very long, its length two to three times in width (120, 1 > 2); interopercle anterior portion conspicuously narrow (133, 0 > 1); metapterygoid one and one-half times longer than deep in perpendicular section (135, 1 > 2); ventral crest of hyomandibula absent (142, 0 > 1); second external branchiostegal ray almost as wide as first ray (148, 0 > 1); second basibranchial spindle shaped (166, 1 > 0); first hypobranchial very elongate transversely, with well-developed and acute mesial face (172, 0 > 1); anterior process of first hypobranchial very conspicuous (173, 0 > 1); second hypobranchial very elongate transversely, its mesial face acute (176, 0 > 1); posterior margin of fourth epibranchial slightly convex, one-fourth as wide as long (187, 0 > 1); accessory crest connecting transverse and median crests associated with neural spine of fourth vertebra present (204, 0 > 1).

**Ambiguous optimization:** Posterior cranial fontanel very wide and long (27, 2 > 3).

#### Included species

*Cephalocassis melanochir* Bleeker, 1852.

**Habitat and distribution:** Freshwater, Southeast Asia (Fig. 24).

#### Remarks

*Hemipimelodus* had been treated as a junior synonym of *Cephalocassis* in recent morphological studies (Marceniuk and Menezes 2007, Marceniuk et al. 2012), a condition supported by an extensive list of shared synapomorphies (2, 15, 50, 85, 116, 120, 135, 142, 166, 204, 148, 200, and 222) including an autapomorphy (presence of a fenestra delimited by the supraoccipital, pterotic, and sphenotic). The total-evidence analysis, however, corroborates results of a previous molecular analysis (Betancur-R. 2009), which supports the recognition of *Cephalocassis* and *Hemipimelodus* as valid genera, indicating a strong morphological convergence of lineages restricted to freshwater. The inclusion of *Cephalocassis* in the subtribe Ariina is supported by the MP and ML analyses.

#### *Cryptarius* Kailola, 2004

(Figs 1–3, 24C, 29)

**Type species:** *Arius truncatus* Valenciennes, 1840.

#### Diagnosis

Mesethmoid medial notch large and shallow (1, 1 > 0); mesethmoid median portion very wide (2, 0 > 2); epioccipital contacting small narrow area of diagonal crest associated with neural spine of fourth vertebra (44, 1 > 0); epioccipital posterior process and medial crest associated with neural spine of fourth vertebra connected (45, 0 > 1); vomer arrow shaped (49, 1 > 3); vomer anterior margin weakly pronounced and serrated (50, 1 > 0); contact face for articulation of transcapular process with basioccipital large and depressed (85, 0 > 1); transcapular process at right angle to body axis (86, 0 > 1); articulation between metapterygoid and quadrate by interdigitated suture in small portion of contact and by overlapping in remaining contact area (136, 0 > 1); metapterygoid anterior process rounded (138, 0 > 2); anterior portion of anterior ceratohyal compressed (150, 0 > 1); posterolateral processes of urohyal long (160, 0 > 1); posterolateral processes of urohyal almost as long as distal portion of bone (162, 2 > 0); posterior portion of second basibranchial long and wide (167, 2 > 0); first pharyngobranchial large and depressed (190, 0 > 1); median crest associated with neural spine of fourth vertebra very high (202, 0 > 1); gas bladder lateral diverticula present (243, 0 > 1); lateral line not bifurcated, reaching dorsal caudal-fin lobe (247, 2 > 1).

**Ambiguous optimization:** Interopercle anterior portion thin and acute (133, 0 > 2); transverse crest associated with neural spine of fourth vertebra very high (200, 0 > 1); adipose-fin base very short (222, 2 > 3).

#### Included species

*Cryptarius daugueti* Chevey, 1932 \* *sedis mutabilis*  
*Cryptarius truncatus* Valenciennes, 1840.

**Habitat and distribution:** Brackish waters, South and Southeast Asia (Fig. 24).

#### Remarks

*Cryptarius* was established by Kailola (2004), and has been recognized as valid by both morphological (Marceniuk and



Menezes 2007, Marceniuk *et al.* 2012) and molecular studies (Betancur-R. 2009), but without consensus on its relationships.

*Hemiarus* Bleeker, 1862

MP 94, ML 91

(Figs 1–3, 30)

*Type species: Cephalocassis stormii* Bleeker, 1858.

#### Diagnosis

Parasphenoid very wide in ventral view (66, 0 > 1); dorsal crest on premaxilla beginning between lateral one-third or one-half of anterior margin (124, 0 > 1); dorsal crest of hyomandibula short and high (141, 0 > 1); third basibranchial chalice shaped (168, 0 > 1); transverse crest associated with neural spine of fourth vertebra very high (200, 0 > 1); median crest associated with neural spine of fourth vertebra very high (202, 0 > 1).

*Ambiguous optimization:* Mesethmoid median portion moderately wide (2, 0 > 1); gas bladder lateral diverticula shallow, rounded bulges (244, 0 > 1).

#### Included species

*Hemiarus bleekeri* Popta, 1900 \* *sedis mutabilis*  
*Hemiarus hardenbergi* Kailola, 2000 \* *sedis mutabilis*  
*Hemiarus harmandi* Sauvage, 1880 \* *sedis mutabilis*  
*Hemiarus manillensis* Valenciennes, 1840 \* *sedis mutabilis*  
*Hemiarus stormii* Bleeker, 1858  
*Hemiarus sumatranus* Anonymous, 1830  
*Hemiarus verrucosus* Ng, 2003 \* *sedis mutabilis*.

*Habitat and distribution:* Predominantly brackish waters, South and Southeast Asia (Fig. 24).

#### Remarks

The total-evidence analysis supports the monophyly of *Hemiarus* as observed in previous morphological studies

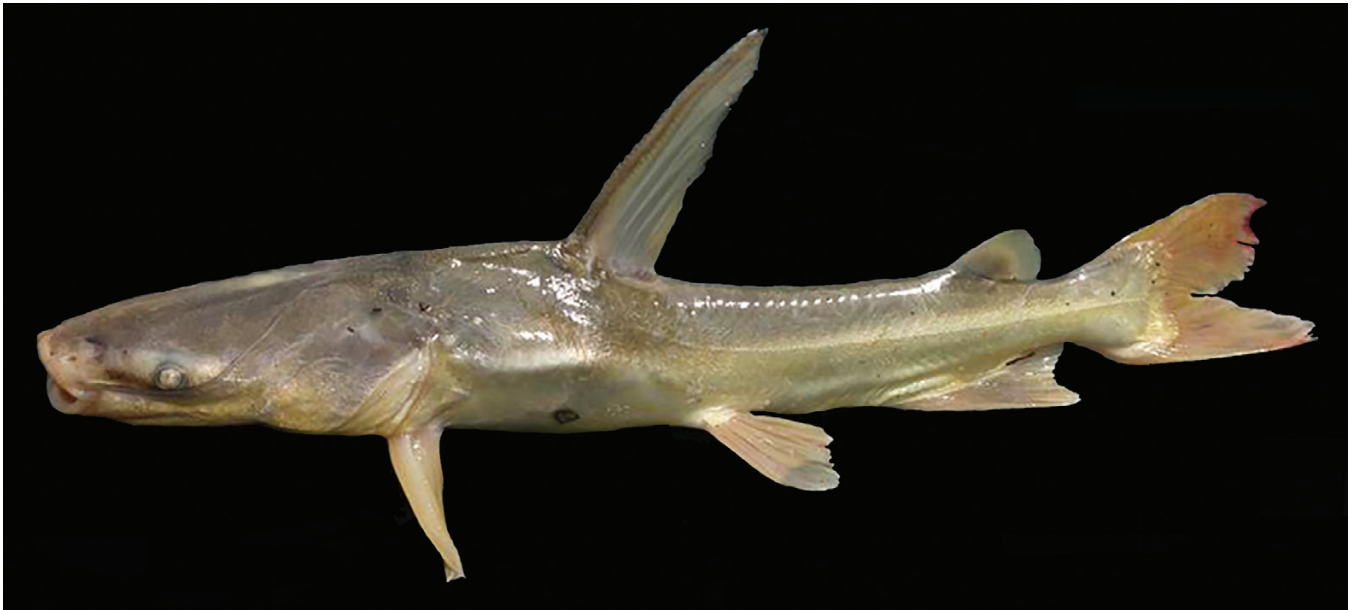

Figure 29. *Cryptarius truncatus*, South and southeast Asia, photograph by Ricardo Betancur-R., type species of the genus.

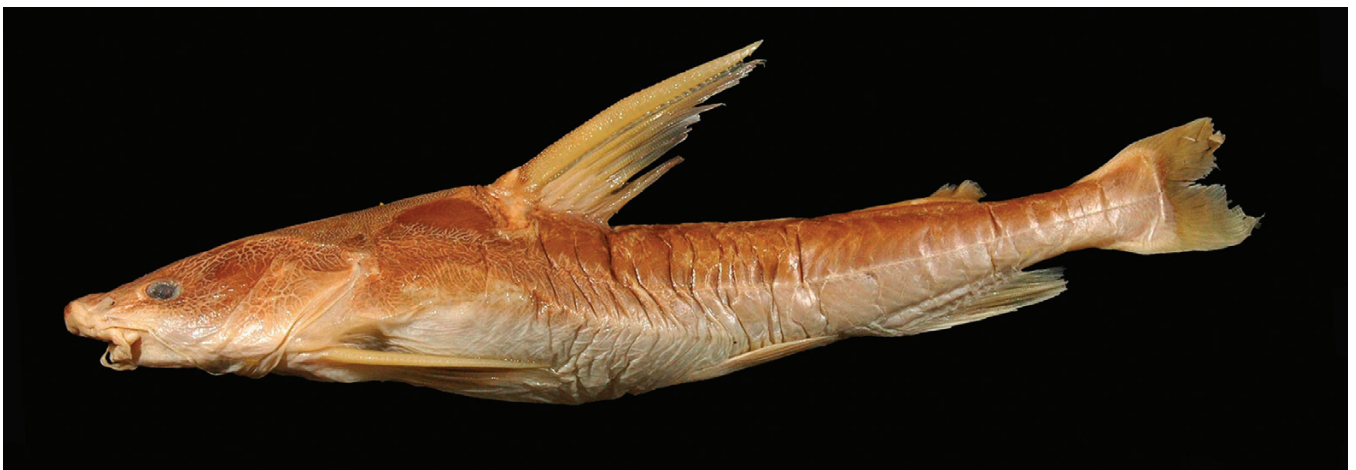

Figure 30. *Hemiarus stormii*, BMNH 1863.12.4.65, Thailand, Vietnam, and Indonesia, type species of the genus.

(Marceniuk and Menezes 2007, Marceniuk et al. 2012). The inclusion of *Hemiarius* in the subtribe Ariina is supported by the MP and ML analyses.

*Hemipimelodus* Bleeker, 1857

(Figs 1–3, 31)

ZooBank registration: [urn:lsid:zoobank.org:act:84D53B59-4ABB-4F76-B370-F9A510BB29F2](https://zoobank.org/urn:lsid:zoobank.org:act:84D53B59-4ABB-4F76-B370-F9A510BB29F2).

Type species: *Pimelodus borneensis* Bleeker, 1851.

*Diagnosis*

Posterior branches of mesethmoid narrow (6, 0 > 1); posterior branches of mesethmoid parallel along entire extension (7, 0 > 1); fenestra delimited by lateral ethmoid and frontal very large (17, 1 > 2); frontal mesial laminar projection absent (23, 1 > 0); posterior cranial fontanel very wide and long (27, 1 > 3); epiphyseal bar transversely elongate and longitudinally narrow (29, 0 > 1); medial groove of cranium absent (30, 0 > 1); fenestra delimited by parieto-supraoccipital, pterotic and sphenotic present (34, 0 > 1); ventral crest of parieto-supraoccipital process well developed through entire extension of process (48, 0 > 1); accessory tooth plates absent (58, 1 > 0); optic foramen very reduced (67, 1 > 2); ventral tip of subvertebral process spatulate (80, 2 > 3); premaxilla narrow and very long, its length two to three times in width (120, 1 > 2); ventral crest of hyomandibula absent (142, 0 > 1); dorsal crest of urohyal projected anteriorly (156, 0 > 1); anterior process of first hypobranchial inconspicuous (173, 1 > 0); second hypobranchial transversely elongate, its mesial face acute (176, 0 > 1); distal portion of uncinat process of third epibranchial acute (183, 1 > 0); posterior margins of fourth epibranchial slightly convex, one-fourth as wide as long (187, 0 > 1); median crest associated with neural spine of third vertebra very high (201, 0 > 1); accessory crest connecting transverse and median crests associated with neural spine of fourth vertebra present (204, 0 > 1); general aspect of superficial ventral ossification regularly arched (211, 0 > 1); posterior process of cleithrum very short (224, 1 > 0).

*Ambiguous optimization*: Frontal as main component of bony bridge formed by lateral ethmoid and frontal (15, 0 > 2); third basibranchial hourglass shaped (168, 1 > 0); transverse crest associated with neural spine of fourth vertebra low (200, 1 > 0).

*Included species*

*Hemipimelodus borneensis* (Bleeker, 1851).

*Habitat and distribution*: Freshwater, South and Southeast Asia (Fig. 24).

*Remarks*

See Remarks of *Cephalocassis*.

*Hexanematichthys* Bleeker, 1858

(Figs 1–3, 24D, 32)

Type species: *Bagrus sondaicus* Valenciennes, 1840.

*Diagnosis*

Posterior branches of mesethmoid moderately long, delimiting between one-fourth and one-half of length of anterior cranial fontanel (8, 0 > 1); posterior branch of lateral ethmoid depressed (13, 0 > 1); posterior cranial fontanel absent (26, 1 > 0); epiphyseal bar indistinct (28, 0 > 1); temporal fossa absent (38, 0 > 1); accessory tooth plates small, oval to rounded (60, 2 > 1); lateral margins of orbitosphenoid progressively diverging anteriorly (63, 0 > 1); autopalatine posterior portion conspicuously compressed (106, 0 > 1); articulation of autopalatine with lateral ethmoid mesoposteriorly oriented (110, 0 > 1); lateral and mesial portions of premaxilla with different sizes (121, 0 > 1); anteroventral portion of opercle subtrapezoidal, very long (127, 1 > 0); Müllerian ramus distal third markedly curved (208, 1 > 2).

*Ambiguous optimization*: Exoccipital bony crest perpendicular to vertebral column and ventrolaterally directed (92, 1 > 0); 15 or more ribs (213, 0 > 1); second dorsal cleithral

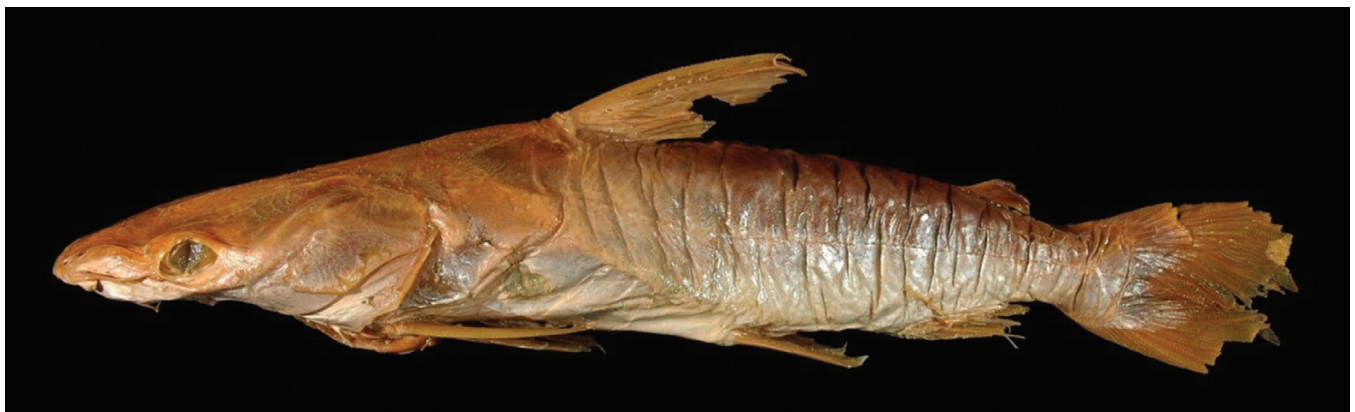

Figure 31. *Hemipimelodus macrocephalus* Bleeker, 1858, junior synonym of *Hemipimelodus borneensis* Bleeker, 1851, BMNH 1863.12.4.78, Sundaland, Malaysia to Vietnam, type species of the genus.

process posteriorly directed and parallel to posterior process (226, 1 > 0).

*Included species*

*Hexanemichthys sagor* Hamilton, 1822.

*Habitat and distribution:* Brackish and marine waters, South and Southeast Asia (Fig. 24).

*Remarks*

The total-evidence analysis supports the validity of *Hexanemichthys*, corroborating the result of a previous molecular study (Betancur-R. 2009) that reveals a strong morphological convergence between *Hexanemichthys* and *Sciades* (characters 26, 28, 93, 106, and 110), which had resulted in them having previously been treated as synonyms (Marceniuk *et al.* 2012).

*Jayaramichthys* gen. nov.

(Figs 1–3, 33)

ZooBank registration: urn:lsid:zoobank.org:act: 84D53B59-4ABB-4F76-B370-F9A510BB29F2.

*Type species:* *Arius leptotacanthus* Bleeker, 1849.

*Diagnosis*

Bony bridge formed by lateral ethmoid and frontal equally represented (15, 0 > 1); accessory tooth plates large, longitudinally elongate (60, 3 > 4); face for articulation of transcapular process with basioccipital large and depressed (85, 0 > 1); transcapular process at right angle to body axis (86, 0 > 1); transcapular process depressed (88, 0 > 1); bony blade connecting posterolateral processes of urohyal absent (159, 0 > 1); median crest associated with neural spine of fourth vertebra very high (202, 0 > 1).

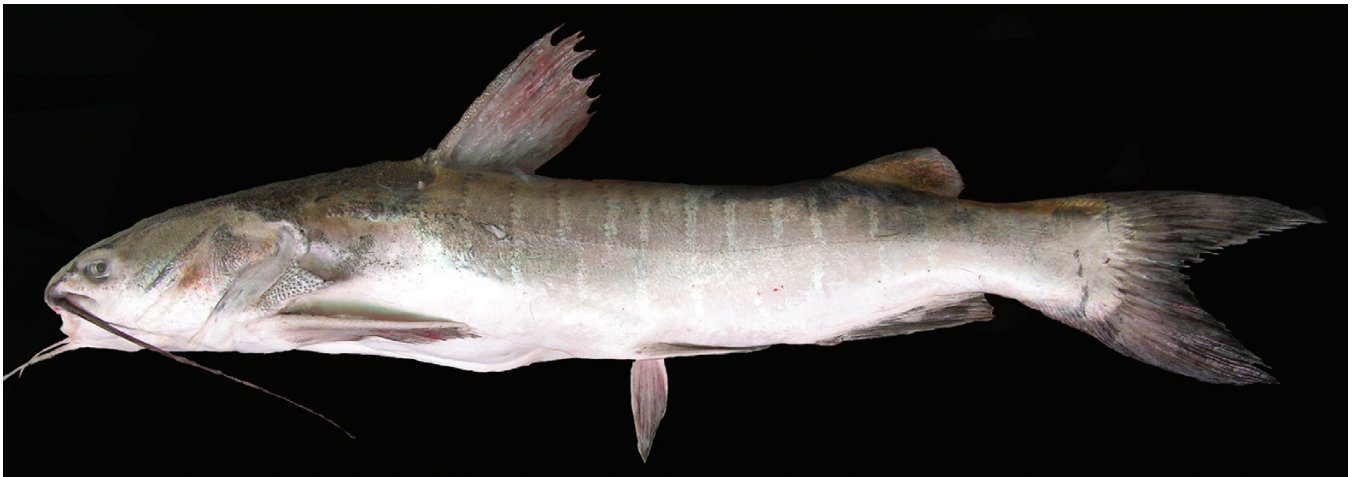

Figure 32. *Hexanemichthys sagor* (senior synonym of *Bagrus sondaicus*), Indo-West Pacific, photograph by Ricardo Betancur-R., type species of the genus.

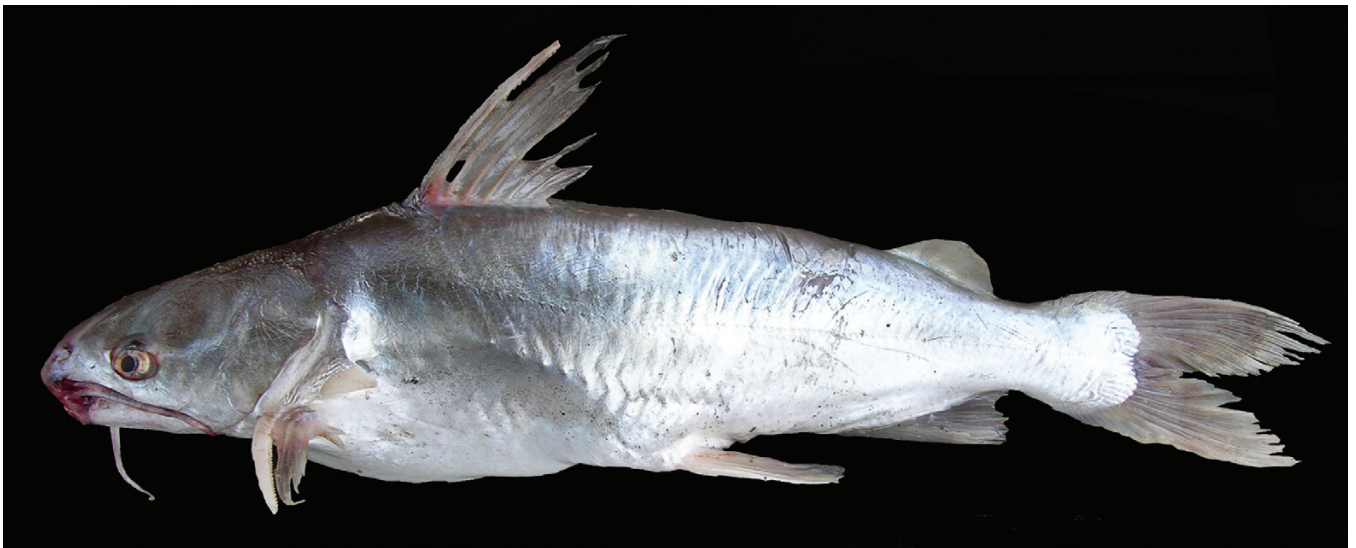

Figure 33. *Jayaramichthys leptotacanthus*, Indonesia and Thailand, photograph by Ricardo Betancur-R., type species of the genus.



**Ambiguous optimization:** Space between transcapular process and otic capsule very small (89, 1 > 2); contact area between interopercle and opercle no more than one-half of interopercle posterior face (131, 1 > 0).

#### Etymology

Named for the Indian ichthyologist Kottore Chidambaram Jayaram (1926–2011) who contributed greatly to our understanding of the taxonomy, evolution, and biogeography of ariids from the Indian subcontinent. Gender: masculine.

#### Included species

*Jayaramichthys leptotacanthus* Bleeker, 1849.

**Habitat and distribution:** Brackish and marine waters, Southeast Asia (Fig. 24).

#### Remarks

*Jayaramichthys* is established to accommodate *Jayaramichthys leptotacanthus*, not examined in a previous morphological study (Marceniuk et al. 2012), but treated as valid (as *Arius leptotacanthus*) in a previous molecular study in Betancur-R. (2009).

***Ketengus* Bleeker, 1846**

(Figs 1–3, 34)

**Type species:** *Ketengus typus* Bleeker, 1846.

#### Diagnosis

Mesethmoid medial notch large and shallow (1, 2 > 0); fenestra delimited by mesethmoid and lateral ethmoid present (3, 0 > 1); fenestra delimited by mesethmoid and lateral ethmoid large, filled with cartilage (4, ? > 0); mesethmoid posterior horn tubular, narrow and elongate (5, 0 > 1); posterior branches of mesethmoid narrow (6, 0 > 1); posterior branches of mesethmoid parallel throughout their entire extension (7, 0 > 1); lateral ethmoid not contact frontal (14, 3 > 0); vomer diamond shaped (49, 1 > 0); vomer lateral processes absent (51, 1 > 0); accessory tooth plates absent (58, 1 > 0); three anterior branches in lachrymal-antorbital anterior part (98, 2 > 3); teeth on dentary along entire bone (116, 1 > 2); dorsal crest of premaxilla present (125, 0 > 1); opercle posterior portion not well developed posteriorly (129, 1 > 0); ventral crest of hyomandibula absent (142, 0 > 1); dorsal crest of urohyal projected anteriorly (156, 0 > 1); one basibranchial

series (164, 0 > 1); first hypobranchial club shaped (171, 0 > 1); second hypobranchial club shaped (175, 0 > 1); first epibranchial overlaying second epibranchial (179, 0 > 1); third pharyngobranchial funnel shaped (192, 1 > 0); seventh vertebra free from ventral superficial ossification (214, 0 > 1).

#### Included species

*Ketengus typus* Bleeker, 1846.

**Habitat and distribution:** Brackish waters, South and Southeast Asia (Fig. 24).

#### Remarks

The close relationship of *Ketengus* plus *Osteogeneiosus* established in previous morphological and molecular studies (Marceniuk and Menezes 2007, Betancur-R. 2009, Marceniuk et al. 2012) is further supported by the results of the total-evidence analysis.

***Kyataphisa* gen. nov.**

MP 100, BI 1, ML 100

(Figs 1–3, 24E, 35)

**ZooBank registration:** urn:lsid:zoobank.org:act: 2981DCA4-DDB0-49A5-BE7A-6D05DD7E750.

**Type species:** *Pimelodus nenga* Hamilton, 1822.

#### Diagnosis

**Ambiguous optimization:** Posterior branches of mesethmoid moderately long, delimiting between one-fourth and one-half of length of anterior cranial fontanel (8, 0 > 1); fenestra delimited by lateral ethmoid and frontal very small or indistinct (17, 1 > 0); pterotic mesial border with parieto-supraoccipital as long as anterior border with sphenotic (36, 1 > 2); temporal fossa much reduced (39, 0 > 1); accessory tooth plates small, vertically oval (60, 3 > 2); exoccipital posterior process not supporting Müllerian ramus (94, 1 > 0); lateral and mesial portions of premaxilla of different sizes (121, 0 > 1); Müllerian ramus bone blade evident only basally (206, 2 > 1); dorsal-fin spine prolonged into filament (221, 0 > 1); second dorsal cleithral process posteriorly directed and parallel to posterior process (226, 1 > 0).

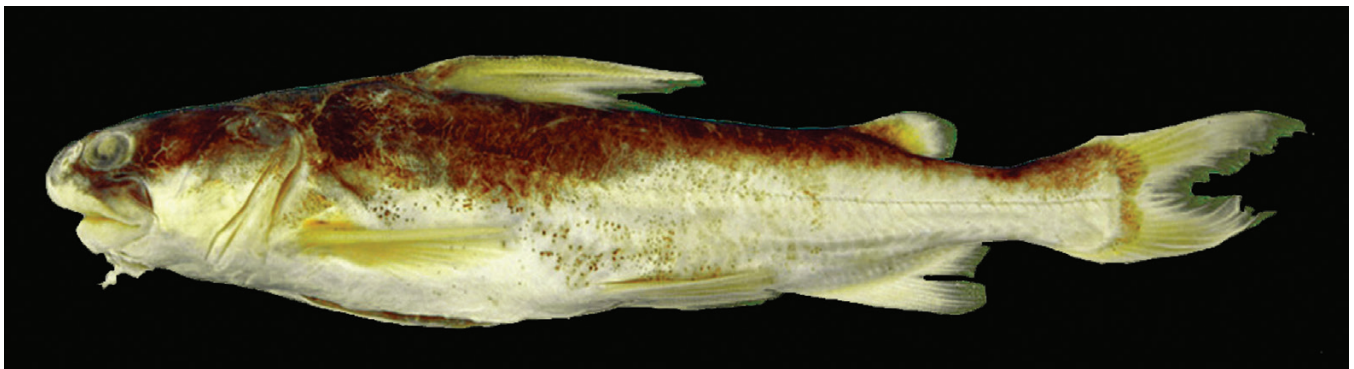

Figure 34. *Ketengus typus*, ANSP 60704, eastern Indian Ocean, type species of the genus.

*Etymology*

*Kyataphisa* is from the Bengali, meaning catfish.

*Included species*

*Kyataphisa nenga* Hamilton, 1822.

*Habitat and distribution:* Brackish and marine waters, South and Southeast Asia (Fig. 24).

*Remarks*

*Kyataphisa* is established to accommodate *Kyataphisa nenga* and a second species (*Kyataphisa* aff. *nenga*) that was not examined in a previous morphological study (Marceniuk *et al.* 2012), corroborating a previous morphological study (as *Arius caelatus* in Marceniuk *et al.* 2012) and a molecular study (as *Arius nenga* in Betancur-R. 2009).

*Osteogeneiosus* Bleeker, 1846

(Figs 1–3, 24F, 36)

*Type species:* *Osteogeneiosus militaris* Linnaeus, 1758.

*Diagnosis*

Nasal anterior curvature very pronounced (20, 0 > 1); bony blade not connecting nasal tubules anteriorly (21, 1 > 0); frontal mesial laminar projection absent (23, 1 > 0); anterior portion of posterior process of vomer as narrow as posterior portion (54, 0 > 1); accessory tooth plates large, longitudinally elongate (60, 3 > 4); accessory tooth plates situated between premaxilla and lateral ethmoid (62, 1 > 2); maxilla cylindrical, very long and distally acute (101, 0 > 2); autopalatine cylindrical, very short and robust (104, ? > 2); anterior cartilage of autopalatine very short, less than

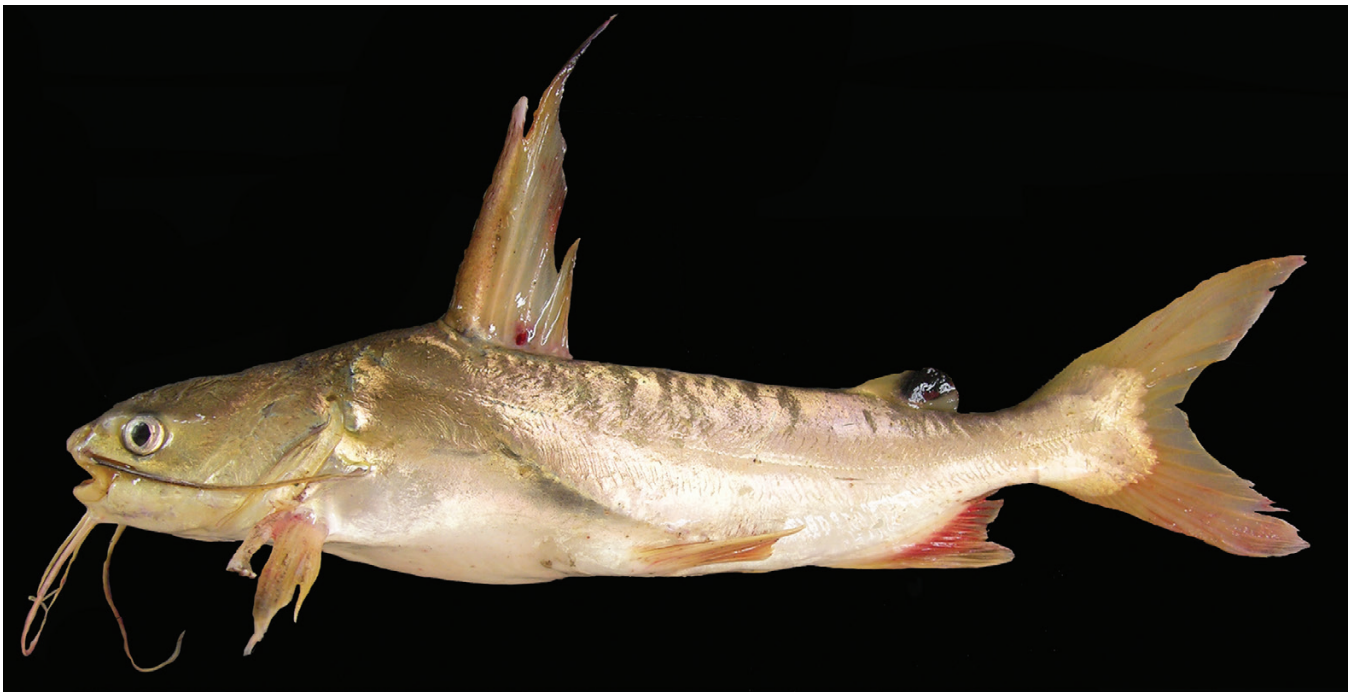

Figure 35. *Kyataphisa nenga*, Indo-West Pacific, photograph by Ricardo Betancur-R., type species of the genus.

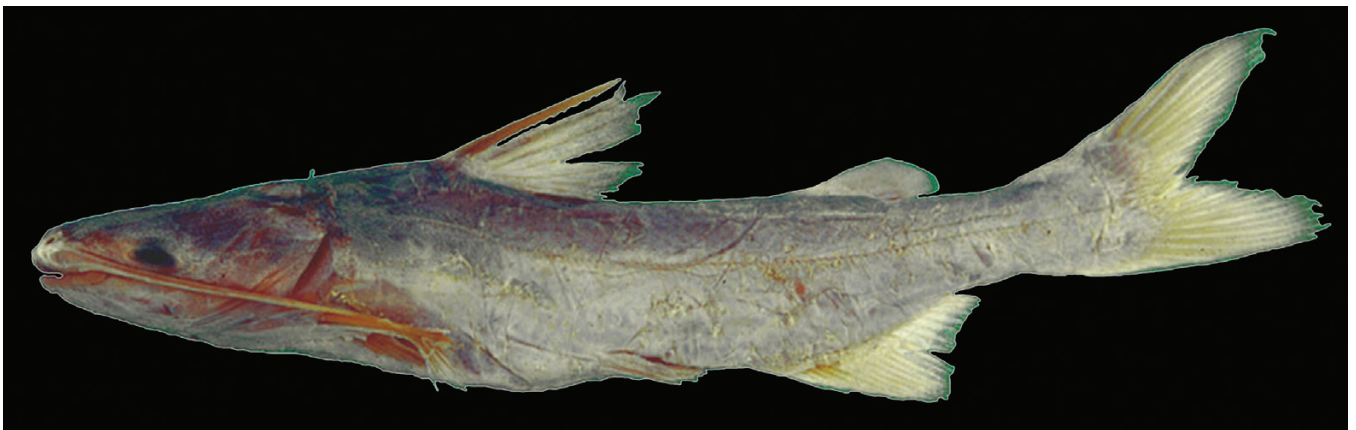

Figure 36. *Osteogeneiosus militaris*, UMMZ 214628, Indo-West Pacific, type species of the genus.

one-third length of bone (113, 1 > 0); autopalatine posterior cartilage reduced to small sphere (114, 1 > 2); anteroventral portion of opercle subtriangular (127, 3 > 4); metapterygoid three times longer than deep (135, 3 > 4); urohyal short (157, 1 > 0); contact face between first epibranchial and first pharyngobranchial very conspicuous (177, 0 > 1); Müllerian ramus distal one-third markedly curved (208, 1 > 2); mental barbel absent (236, 0 > 1); gas bladder lateral diverticula present (243, 0 > 1); gas bladder diverticula present anterolaterally (246, 0 > 1).

**Ambiguous optimization:** Anterior portion of anterior cranial fontanel partially or totally delimited by dorsal expansion of orbitosphenoid (24, 0 > 1); posterior cranial fontanel formed exclusively frontals (25, 0 > 1); maxillary condyle very large (103, 1 > 3); anteroventral portion of opercle subtrapezoidal, moderately long (127, 2 > 1); second external branchiostegal ray width less than one-half that of first ray (148, 1 > 0); second basibranchial mushroom shaped (166, 0 > 1); third basibranchial hourglass shaped (168, 1 > 0); 19 or more precaudal vertebrae (215, 0 > 1); gas bladder lateral diverticula with diverticula (244, 0 > 1); protractor muscle of parapophysis of fourth vertebra originating exclusively from ventral surface of posterior process of epioccipital (248, 0 > 1).

#### Included species

*Osteogeneiosus militaris* (Linnaeus, 1758).

**Habitat and distribution:** Brackish and marine waters, South and Southeast Asia (Fig. 24).

#### Remarks

The close relationship of *Osteogeneiosus* with *Ketengus* that was reported in previous morphological and molecular studies (Marceniuk and Menezes 2007, Betancur-R. 2009, Marceniuk *et al.* 2012) is supported by the results of the total-evidence analysis.

#### *Pseudosciades* gen. nov.

(Figs 1–3, 24G, 37)

**ZooBank registration:** urn:lsid:zoobank.org:act: 0A403C08-B65C-4292-B708-2B7E1AC9456D.

**Type species:** *Arius sona* Hamilton, 1822.

#### Diagnosis

Posterior branches of mesethmoid moderately long, delimiting between one-fourth and one-half of anterior cranial fontanel length (8, 0 > 1); epioccipital dorsally visible (41, 0 > 1); margin of parieto-supraoccipital process contacting nuchal plate convex (47, 0 > 1); lateral margins of orbitosphenoid progressively diverging anteriorly (63, 0 > 1); lateral and mesial portions of premaxilla of different sizes (121, 0 > 1); anteroventral portion of opercle subtrapezoidal, very long (127, 1 > 0); metapterygoid anterior process truncate (138, 0 > 1); posterior end of urohyal truncated (158, 0 > 2); posterolateral processes of urohyal posteriorly oriented, forming an angle smaller than 60° (161, 0 > 1); Müllerian ramus distal one-third markedly curved (208, 1 > 2); nuchal plate anterior margin slightly concave (219, 0 > 1).

**Ambiguous optimization:** Posterior cranial fontanel formed exclusively within frontals (25, 0 > 1).

#### Etymology

*Pseudo* from Latin, meaning false, in reference to its convergent morphology with the Neotropical genus *Sciades*. Gender: masculine.

#### Included species

*Pseudosciades sona* (Hamilton, 1822).

**Habitat and distribution:** Brackish and marine waters, South and Southeast Asia (Fig. 24).

#### Remarks

*Pseudosciades sona* is an Old World species that shares with *Sciades parkeri* (type species of the New World genus *Sciades*) a medial groove of neurocranium delimited mainly by frontal bones, anterior and median nuchal plates forming a shield-like structure, and nuchal plate overlapping parietosupraoccipital, but were shown to be not closely related in the total-evidence analysis or in a previous molecular study (Betancur-R. 2009).

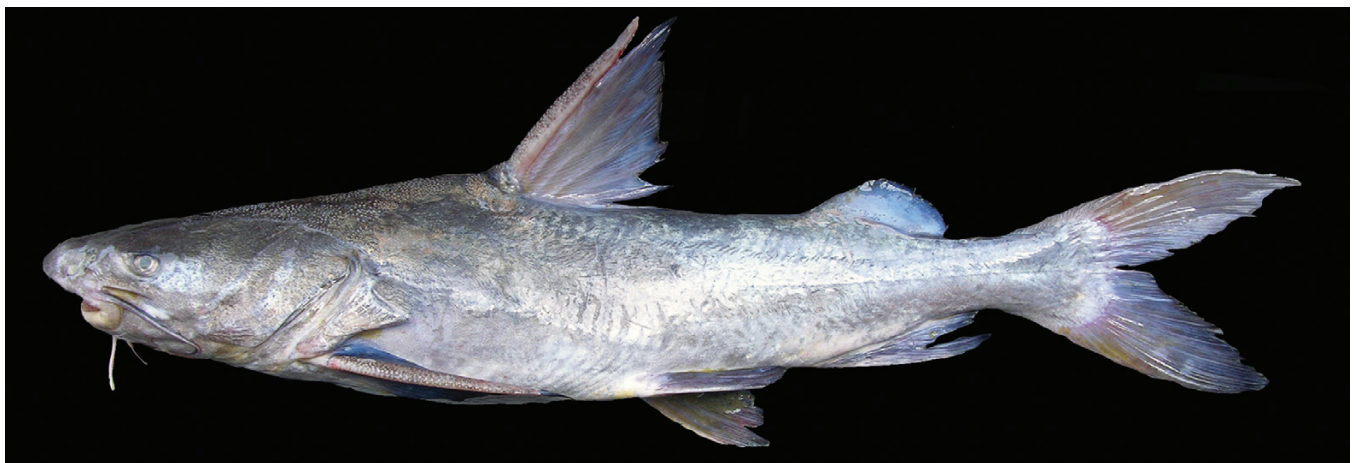

Figure 37. *Pseudosciades sona*, Indo-West Pacific, photograph by Ricardo Betancur-R., type species of the genus.



**Subtribe Doiichthyina Weber, 1913**

MP 68, BI 1, ML 50

(Figs 1–3, 38)

*Type genus: Doiichthys* Weber, 1913.*Diagnosis*

Accessory tooth plates small, transversely elongate and narrow (60, 2 > 0), state 3 in *Doiichthys*. *Ambiguous optimization*: Mesethmoid medial notch large and shallow (1, 1 > 0), reversed *Brustarius* (except *Brustarius utarus*), *Cinetodus*, *Neoarius*, *Pachyula*, *Pararius mastersi*, and *Potamosilurus velutinus*; posterior cranial fontanel formed by frontals and parieto-supraoccipital (25, 1 > 0).

*Remarks*

The recognition of the subtribe Doiichthyina corroborates the results of a previous molecular study (Betancur-R. 2009), which recognized two distinct lineages of Ariina, one in Papua New Guinea and Australia (Doiichthyina) and the other in Asia (Ariina).

**Included genera**

*Aceroichthys* gen. nov.  
*Blekeriella* gen. nov.  
*Brustarius* Herre, 1935  
*Cinetodus* Ogilby, 1898  
*Cochlefelis* Whitley, 1941  
*Doiichthys* Weber, 1913  
*Nedystoma* Ogilby, 1898  
*Nemapteryx* Ogilby, 1908  
*Neoarius* Castelnau, 1878  
*Megalosciades* gen. nov.  
*Pachyula* Ogilby, 1898  
*Paracinetodus* gen. nov.  
*Pararius* Whitley, 1940  
*Papuarius* gen. nov.  
*Potamosilurus* Marceniuk & Menezes, 2007.

*Aceroichthys* gen. nov.

(Figs 1–3, 38E, 39)

*Type species: Arius dioctes* Kailola, 2000.*Diagnosis*

Posterior branches of mesethmoid very long, delimiting one-half of length of anterior cranial fontanel (8, 0 > 2); lateral horn of lateral ethmoid variable length and laterally oriented (12, 1 > 0); posterior branch of lateral ethmoid depressed (13, 0 > 1); lateral expansions of orbitosphenoid and pterosphenoid absent (64, 1 > 0); parasphenoid very wide in ventral view (66, 0 > 1); exoccipital posterior process not supporting Müllerian ramus (94, 1 > 0); premaxilla wide and short, its length more than four times in width (120, 1 > 0); anteroventral portion of opercle subtrapezoidal, very long (127, 1 > 0); no more than one-half of posterior part of interopercle contacting ventral margin of opercle (131, 1 > 0); posterolateral processes of urohyal almost as long as distal portion of bone (162, 2 > 0).

*Etymology*

Named after the Colombian ichthyologist Arturo Acero P. (b. 1954) to honour his valuable contributions to ariid taxonomy. Gender: masculine.

*Included species**Aceroichthys dioctes* Kailola, 2000.

*Habitat and distribution*: Fresh and brackish waters, southern New Guinea and northern Australia (Fig. 38).

*Remarks*

*Aceroichthys* is established based on morphological and molecular evidence to accommodate *Aceroichthys dioctes*, with phylogenetic relationships first reported in a molecular study (Betancur-R. 2009).

*Blekeriella* gen. nov.

MP 100, BI 1, ML 100

(Figs 1–3, 40)

ZooBank registration: [urn:lsid:zoobank.org:act:8CB66BDD-FB43-495E-B45A-EBF42667194F](https://zoobank.org/urn:lsid:zoobank.org:act:8CB66BDD-FB43-495E-B45A-EBF42667194F).

*Type species: Arius leptaspis* Bleeker, 1862.*Diagnosis (all of ambiguous optimization)*

Posterior branch of lateral ethmoid depressed (13, 0 > 1); posterior cranial fontanel absent (26, 1 > 0); epiphyseal bar indistinct (28, 0 > 1); medial groove of cranium absent (30, 0 > 1); temporal fossa very reduced (39, 1 > 0); posterior process of exoccipital sutured to Müllerian ramus (93, 0 > 1); autopalatine posterior portion conspicuously compressed (106, 0 > 1); articulation of autopalatine with lateral ethmoid posteromesially oriented (110, 0 > 1); lateral and mesial portions of premaxilla with different sizes (121, 0 > 1); anteroventral portion of opercle subtrapezoidal, very long (127, 1 > 0); one-half or less of interopercle posterior part contacting ventral margin of opercle (131, 1 > 0); sesamoid bone I very long and subtriangular (145, 0 > 1); Müllerian ramus bone blade evident only basally (206, 2 > 1); Müllerian ramus distal third markedly curved (208, 1 > 2).

*Etymology*

Named for the Dutch ichthyologist Pieter Bleeker (1819–1878) who contributed greatly to our understanding of the taxonomy of ariids from the Indo–Malaysian archipelago. Gender: feminine.

*Included species**Blekeriella leptaspis* Bleeker, 1862*Blekeriella* aff. *leptaspis*.

*Habitat and distribution*: Predominantly brackish waters, southern New Guinea and northern Australia (Fig. 38).

*Remarks*

*Arius leptaspis* was previously included in *Ariopsis* Kailola 2004 or *Sciades* (Marceniuk and Menezes 2007, Marceniuk et al. 2012),

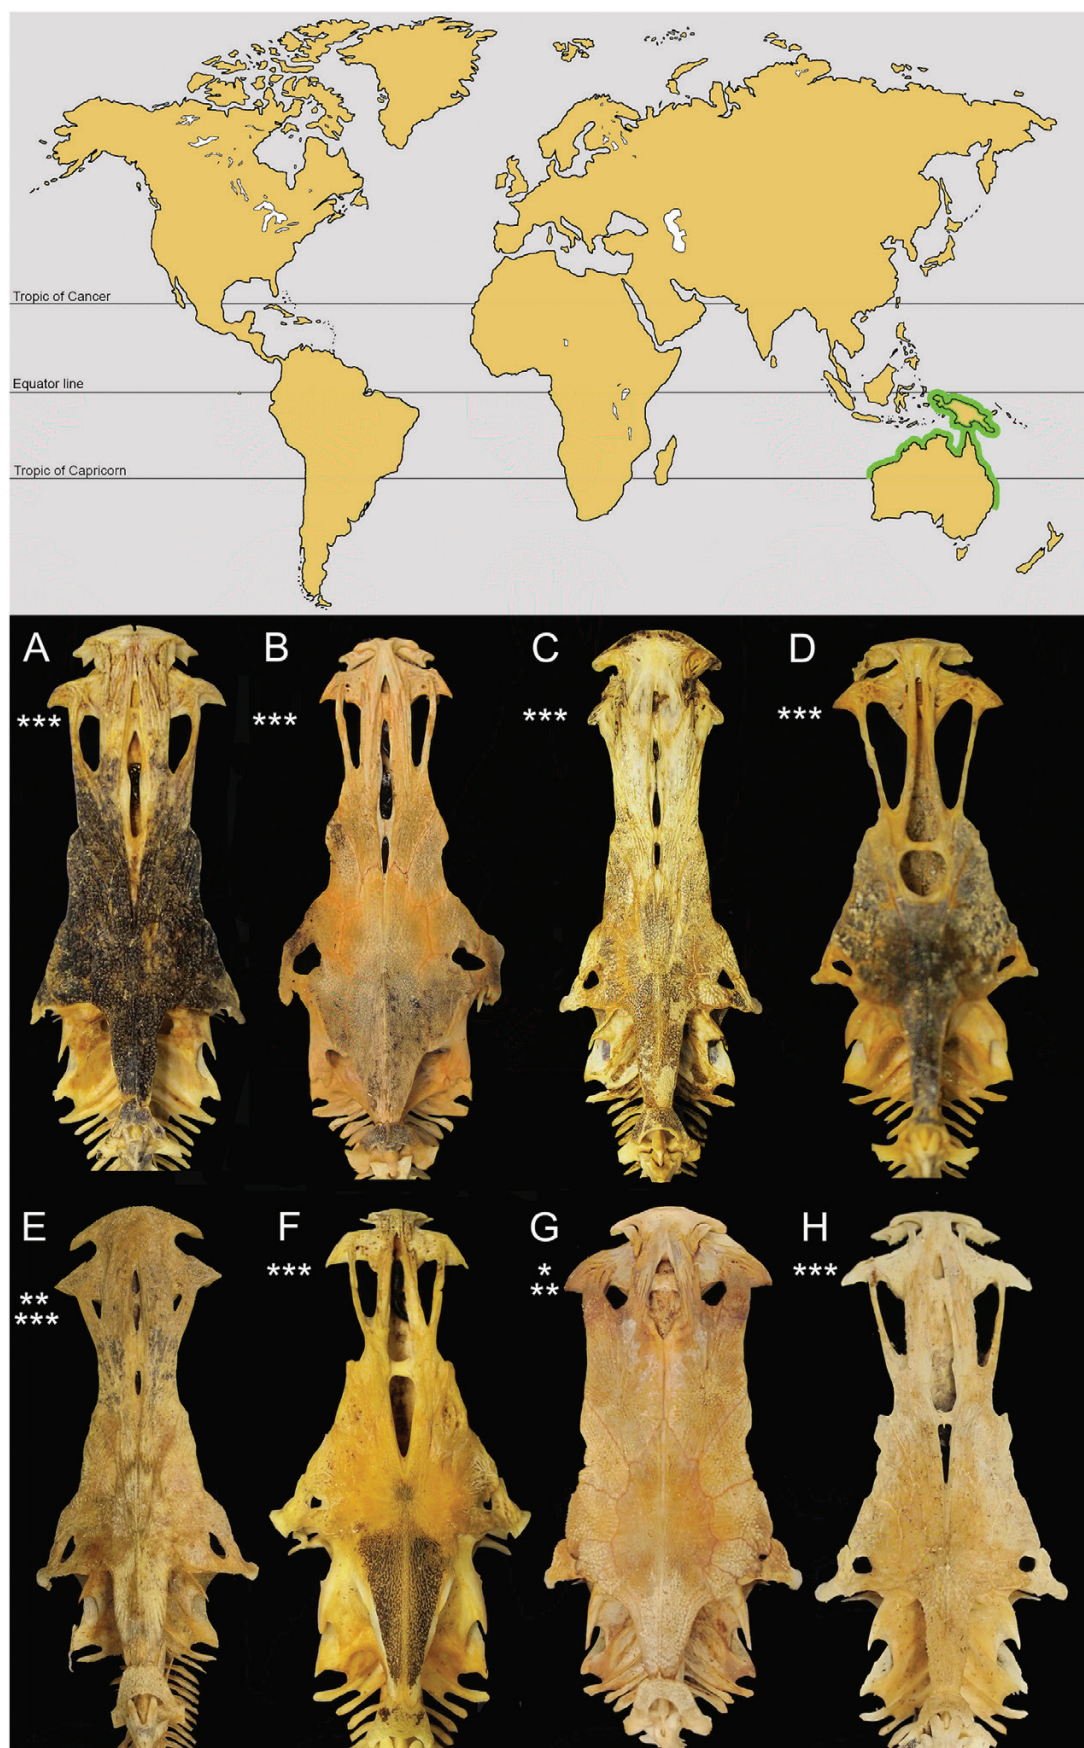

**Figure 38.** Representative skulls, in dorsal view, and distribution of the subtribe Doiichthyina. A, *Brustiarius nox*, AUM 47488. B, *Paracinetodus carinatus*, AUM 47550. C, *Cochlefelis spatula*, AUM 50296. D, *Nedystoma dayi*, AUM 47500. E, *Acerioichthys dioctes*, AUM 47507. F, *Pachyula crassilabris*, AUM 47509. G, *Pararius proximus*, AUM 47486. H, *Potamosilurus velutinus*, AUM 47489. \* marine, \*\* brackish waters, \*\*\* freshwater.



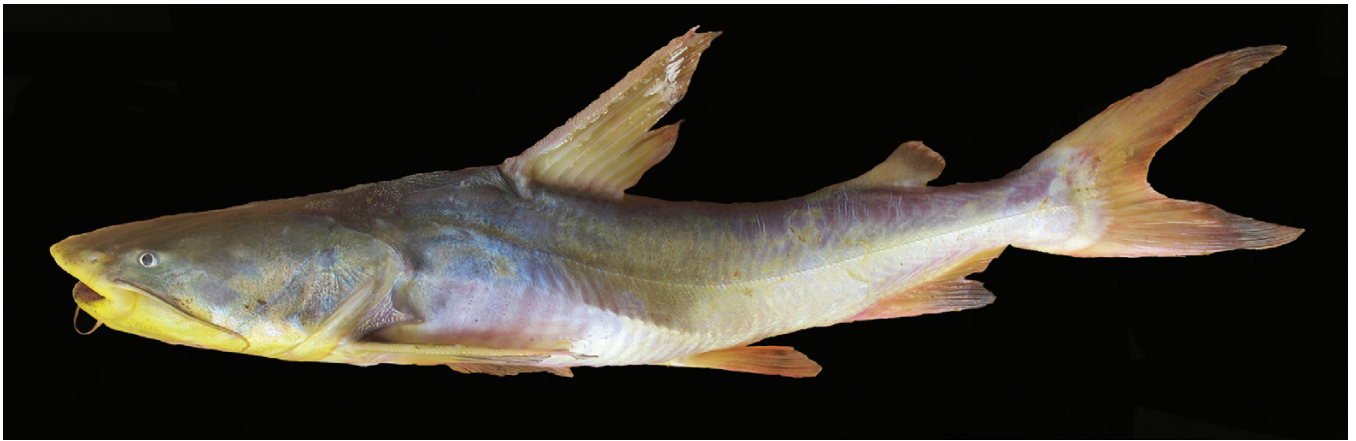

Figure 39. *Aceroichthys dioctes*, Australia and New Guinea, photograph by Ricardo Betancur-R., type species of the genus.

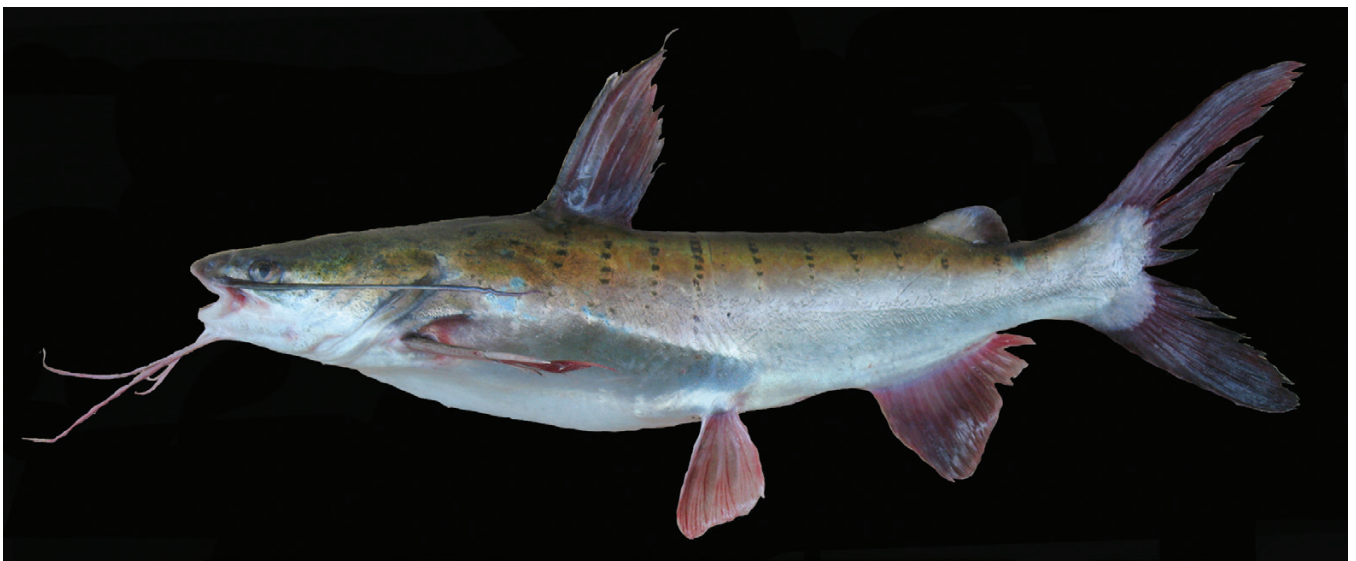

Figure 40. *Bleekeriella leptaspis*, northern Australia and New Guinea, photograph by Ricardo Betancur-R., type species of the genus.

but results of the total-evidence analysis indicate that it is not closely related to species of either genus, but is related closely to an unnamed species from Indonesia. These findings corroborate a previous molecular study (Betancur-R. 2009).

*Brustiarius* Herre, 1935

MP 100, BI 1, ML 100

(Figs 1–3, 38A, 41)

Type species: *Arius nox* Herre, 1935.

Diagnosis

Accessory tooth plates small, oval to rounded (60, 0 > 1); lateral and mesial portions of premaxilla of different sizes (121, 0 > 1); metapterygoid anterior process acute (138, 1 > 0).

*Ambiguous optimization*: Posterior cranial fontanel small (27, 1 > 0); vomer lateral processes very narrow (53, 0 > 1); maxilla lateral and mesial margins considerably closer to each other

proximally, distally narrow and pointed (102, 2 > 3); articulation of autopalatine with lateral ethmoid in middle of bone (111, 2 > 1); first external branchiostegal ray narrow proximally and broad distally (147, 1 > 0); posterior ceratohyal long (153, 0 > 1).

Included species

*Brustiarius nox* Herre, 1935

*Brustiarius solidus* Herre, 1935

*Brustiarius utarus* Kailola, 1990.

Habitat and distribution: Freshwater, northern New Guinea (Fig. 38).

Remarks

As indicated by the total-evidence analysis, *Brustiarius* follows the definition and species composition proposed in previous morphological studies (Kailola 2004, Marceniuk and Menezes 2007, Marceniuk et al. 2012), with the inclusion of *Brustiarius utarus* sensu Betancur-R. (2009). The species in *Brustiarius* were treated as a species flock, based on the shallow genetic divergences found by Betancur-R. (2009).



*Cinetodus* Ogilby, 1898

(Figs 1–3, 42)

*Type species: Arius froggatti* Ramsay & Ogilby, 1886.*Diagnosis*

Mesethmoid median portion very narrow (2, 2 > 0); extrascapular subtriangular (37, 1 > 2); epioccipital contacting a small narrow area of diagonal crest associated with neural spine of fourth vertebra (44, 1 > 0); vomer anterior margin very pronounced and acute (50, 0 > 1); basioccipital lateral process absent with anterior and posterior portions equally developed (83, 1 > 0); anteroventral portion of opercle subtrapezoidal, very long (127, 1 > 0); metapterygoid one and one-half times longer than deep in perpendicular section (135, 1 > 2); posterolateral processes of urohyal short (160, 1 > 0); third basibranchial chalice shaped (168, 0 > 1); upper (pharyngeal) tooth plate round, as wide as long (195, 1 > 0); dorsal processes of upper

(pharyngeal) tooth plate very short or absent (197, 1 > 0); median crest associated with neural spine of fourth vertebra very high (202, 0 > 1); Müllerian ramus robust (207, 0 > 1); ventral surfaces of parapophyses of fifth and sixth vertebrae conspicuously concave (212, 0 > 1); adipose fin long (222, 2 > 1).

*Ambiguous optimization:* Mesethmoid medial notch narrow and deep (1, 0 > 1); lateral horn of lateral ethmoid compressed and spatulate (11, 0 > 1); premaxilla very wide and short, as long as wide (120, 1 > 3); posterior process of cleithrum very long (224, 0 > 2).

*Included species*

*Cinetodus froggatti* Ramsay & Ogilby, 1886.

*Habitat and distribution:* Fresh and brackish waters, southern New Guinea and northern Australia (Fig. 38).

*Remarks*

The results of the total-evidence analysis support the recognition of *Cinetodus* as previously defined by morphological and

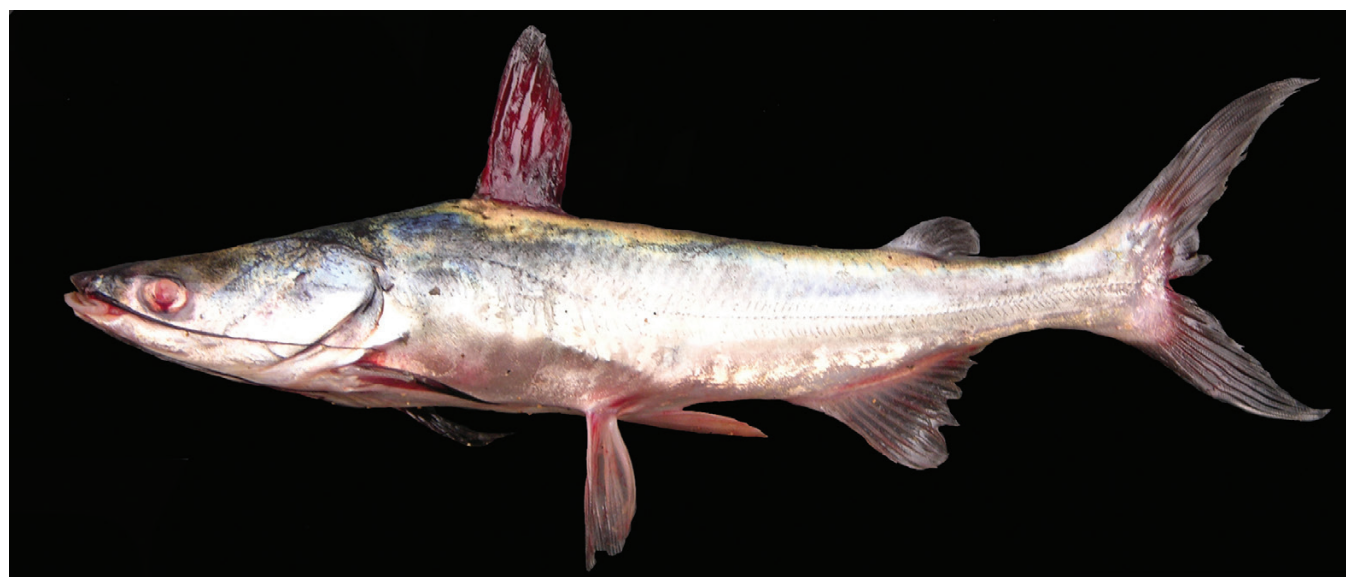

Figure 41. *Brustiarius nox*, New Guinea, photograph by Ricardo Betancur-R., type species of the genus.

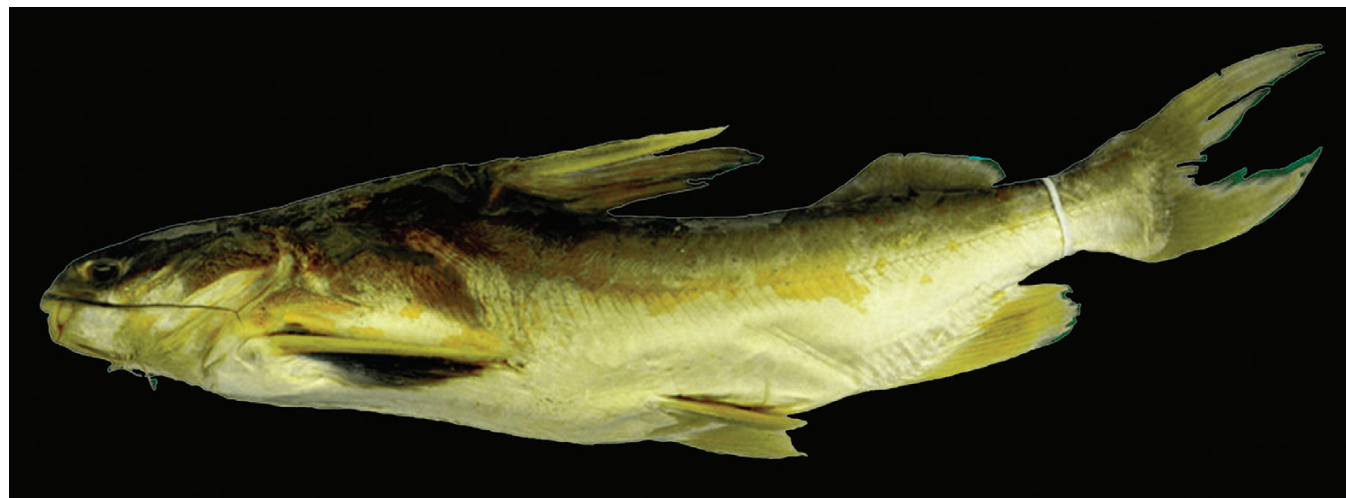

Figure 42. *Cinetodus froggatti*, USNM 217080, Papua New Guinea and northern Australia, type species of the genus.

molecular data (Marceniuk and Menezes 2007, Betancur-R. 2009, Marceniuk *et al.* 2012), with a new hypothesis of relationships.

*Cochlefelis* Whitley, 1941

MP 100, BI 1, ML 100

(Figs 1–3, 38C, 43)

*Type species:* *Arius spatula* Ramsay & Ogilby, 1886.

*Diagnosis*

Posterior branch of lateral ethmoid depressed (13, 0 > 1); vomer lateral processes very narrow (53, 0 > 1); parasphenoid very wide in ventral view (66, 0 > 1); exoccipital posterior process not supporting Müllerian ramus (94, 1 > 0); maxilla lateral and mesial margins slender proximally, narrow and pointed distally (102, 2 > 3); articulation of autopalatine with lateral ethmoid in middle of bone (111, 2 > 1); premaxilla wide and short, its length more than four times in width (120, 1 > 0); dorsal crest on premaxilla beginning between lateral one-third or one-half of anterior margin (124, 0 > 1); anteroventral portion of opercle subtriangular (127, 1 > 4); one-half or less of interopercle posterior part contacting ventral margin of opercle (131, 1 > 0); first external branchiostegal ray narrow proximally and broad distally (147, 1 > 0); posterior ceratohyal long (153, 0 > 1); third basibranchial long and narrow (169, 1 > 2); mesial one-fourth of fourth epibranchial robust, almost as wide as long (186, 1 > 0); 39 or more caudal vertebrae (216, 1 > 0).

*Ambiguous optimization:* Posterior cranial fontanel formed exclusively frontals (25, 0 > 1); lateral margin of third pharyngobranchial weakly developed and rounded (193, 1 > 0); 15 or more ribs (213, 0 > 1).

*Included species*

*Cochlefelis danielsi* Regan, 1908

*Cochlefelis insidiator* Kailola, 2000 \* *sedis mutabilis*  
*Cochlefelis spatula* Ramsay & Ogilby, 1886.

*Habitat and distribution:* Fresh and brackish water, southern New Guinea (Fig. 38).

*Remarks*

The monophyly and species composition of *Cochlefelis*, *sensu* Kailola 2004, Betancur-R. 2009, and Marceniuk *et al.* 2012, are supported by the total-evidence analysis.

*Doiichthys* Weber, 1913

(Figs 1–3, 44)

*Type species:* *Doiichthys novaeguineae* Weber, 1913.

*Diagnosis*

Lateral horn of lateral ethmoid long and posteriorly oriented (12, 1 > 2); nasal not well defined (19, 0 > 1); ventral crest of parieto-supraoccipital process weakly developed, restricted to base of process (48, 1 > 0); three infraorbitals (95, 3 > 1); articulation of autopalatine with lateral ethmoid slightly anterior to middle of bone (111, 2 > 0); metapterygoid twice as deep as long in perpendicular section (135, 1 > 0); first external branchiostegal ray proximally narrow and distally broad (147, 1 > 0); posterior ceratohyal very long (153, 0 > 2); urohyal very long (157, 1 > 2); posterior end of urohyal bifurcate (158, 0 > 1); urohyal posterolateral processes one-third as long as distal portion of bone (162, 2 > 4); first and second epibranchials straight for entire length (178, 0 > 1); mesial portion of first epibranchial very large and depressed (180, 0 > 2); first pharyngobranchial on mesial end of first epibranchial (191, 1 > 0); third pharyngobranchial funnel shaped (192, 1 > 0); upper (pharyngeal) tooth plate long and narrow, its length three times its width (195, ? > 2); transverse crest associated with neural spine of fourth vertebra low

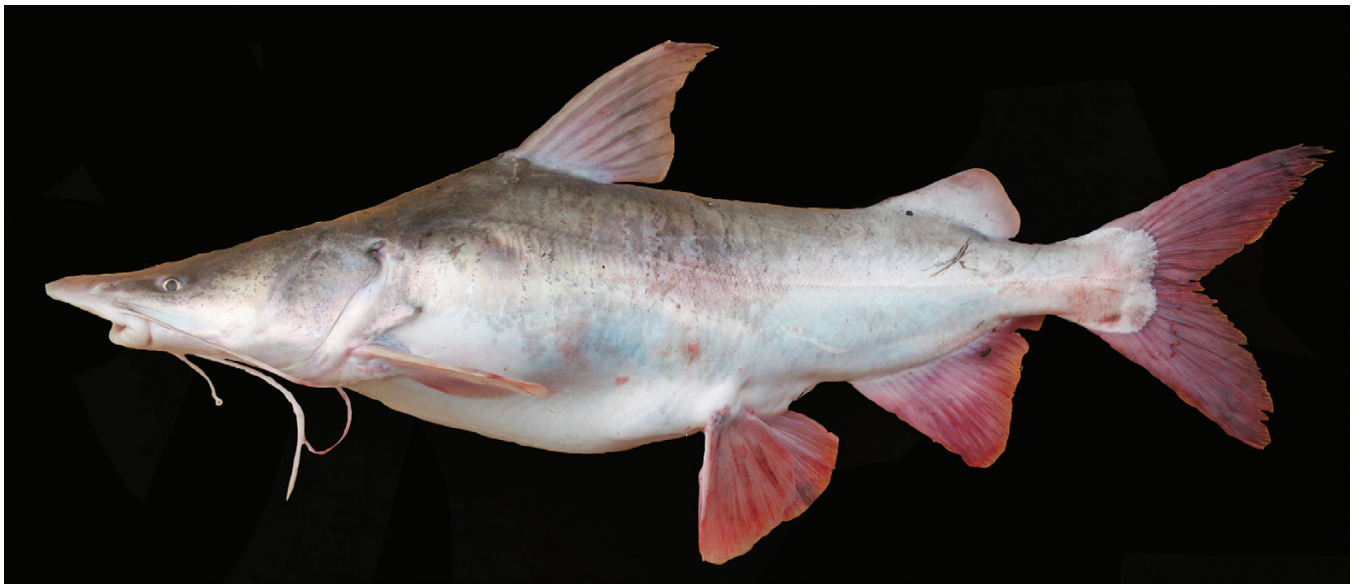

Figure 43. *Cochlefelis spatula* Regan, 1908, New Guinea, photograph by Ricardo Betancur-R., type species of the genus.

(200, 1 > 0); median crest associated with neural spine of third vertebra low or absent (201, 1 > 0).

*Ambiguous optimization:* Accessory tooth plates present (58, 0 > 1).

#### *Included species*

*Doiichthys novaeguineae* Weber, 1913.

*Habitat and distribution:* Brackish waters, southern New Guinea (Fig. 38).

#### *Remarks*

The total-evidence analysis supports a sister group relationship of *Doiichthys* plus *Nedystoma*, which was uncovered previously in independent molecular and morphological studies (Kailola 2004, Marceniuk and Menezes 2007, Betancur-R. 2009, Marceniuk *et al.* 2012). The synonymy of *Doiichthys* with *Nedystoma* proposed by Kailola (2004) is rejected and *Doiichthys* is recognized as a valid genus following Marceniuk and Menezes (2007) and Betancur-R. (2009).

#### *Megalosciades* gen. nov.

(Figs 1–3, 45)

ZooBank registration: [urn:lsid:zoobank.org:act:1DF58A15-AE63-4686-BEE0-9511F9971FFF](https://zoobank.org/act:1DF58A15-AE63-4686-BEE0-9511F9971FFF).

*Type species:* *Arius augustus* Roberts, 1978.

#### *Diagnosis*

The genus *Megalosciades* is defined based on unique characters of external morphology reported by Roberts (1978) in the species description: extremely short maxillary barbel; very small eye; broad head and broad mouth.

#### *Etymology*

Named for the disproportionally large head of the type species in comparison to those observed in *Sciades* and close relatives. Gender: masculine.

#### *Included species*

*Megalosciades augustus* Roberts, 1978.

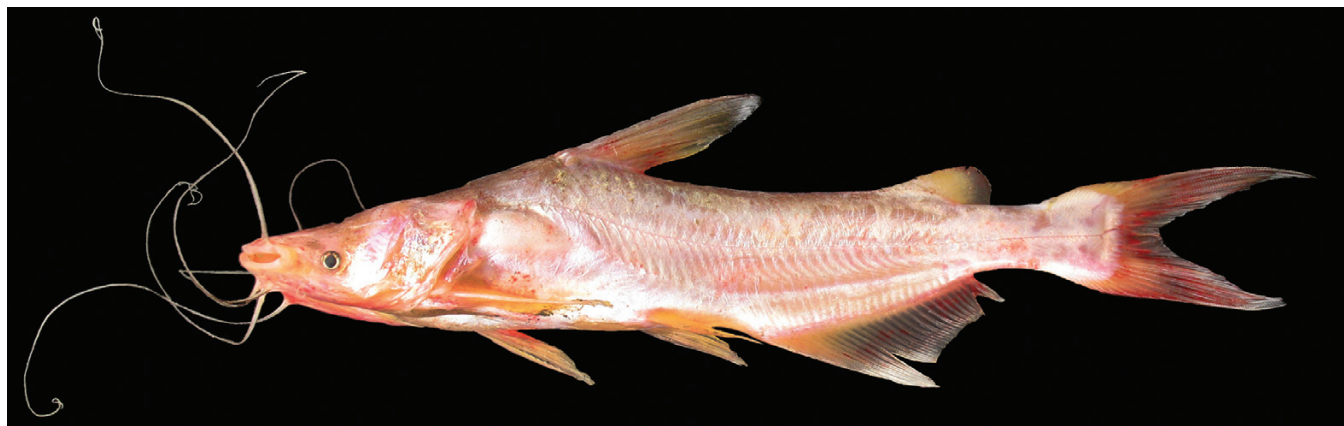

Figure 44. *Doiichthys novaeguineae*, New Guinea, photograph by Ricardo Betancur-R., type species of the genus.

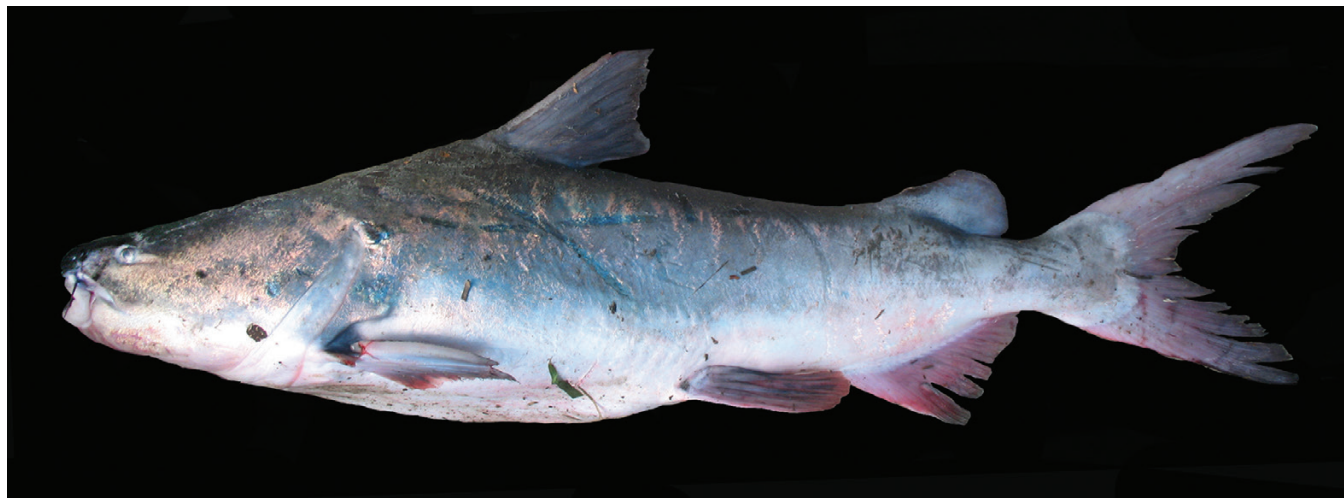

Figure 45. *Megalosciades augustus* Roberts, 1978, Papua New Guinea, photograph by Ricardo Betancur-R., type species of the genus.



*Habitat and distribution:* Freshwater, southern New Guinea (Fig. 38).

#### Remarks

Over that past two decades, *Megalosciades augustus* has been treated by different authors as a valid species in three different genera: *Arius*, *Nemapteryx*, and *Neoarius*. Molecular data (Betancur-R. 2009) does not support the inclusion of that species within any of those genera, nor does it appear to be the sister group of any of them. Although BI and ML analyses support the inclusion of *Megalosciades augustus* in *Cochlefelis*, the two genera are externally very distinct (Figs 45, 53) and the absence of internal morphological data makes it impossible to establish a diagnosis. This is an unstable situation, which may be resolved by assigning that enigmatic species to its own genus, within which it can remain until a discovery that its phylogenetic position is actually embedded within another genus.

#### *Nedystoma* Ogilby, 1898

(Figs 1–3, 38D, 46)

*Type species:* *Hemipimelodus dayi* Ramsay & Ogilby, 1886.

#### Diagnosis

Mesethmoid median portion very narrow ( $2, 2 > 1$ ); premaxilla wide and moderately long, its length more than three times in width ( $120, 3 > 1$ ); premaxilla lateral and mesial portions of different sizes ( $121, 0 > 1$ ); anterior margin of premaxilla fringed ( $122, 0 > 1$ ); anteroventral portion of opercle subtrapezoidal, very long ( $127, 1 > 0$ ); dorsal crest of hyomandibula short and high ( $141, 0 > 1$ ); second external branchiostegal ray almost as wide as first ray ( $148, 0 > 1$ ); distal portion of third external branchiostegal ray spatulate ( $149, 0 > 1$ ); contact face between first epibranchial and first pharyngobranchial very conspicuous ( $177, 0 > 1$ ).

*Ambiguous optimization:* Upper (pharyngeal) tooth plate very long and narrow, its length more than four times its width ( $195, ? > 3$ ).

#### Included species

*Nedystoma dayi* Ramsay & Ogilby, 1886.

*Habitat and distribution:* Predominantly freshwaters, but also in brackish waters, southern New Guinea (Fig. 38).

#### Remarks

See Remarks of *Doiichthys*.

#### *Nemapteryx* Ogilby, 1908

MP 100, BI 1, ML 100

(Figs 1–3, 47)

*Type species:* *Arius stirlingi* Ogilby, 1898.

#### Diagnosis (all of ambiguous optimization)

Posterior branches of mesethmoid narrow ( $6, 0 > 1$ ); posterior branches of mesethmoid parallel throughout ( $7, 0 > 1$ ); posterior branches of mesethmoid moderately long, delimiting between one-fourth and one-half of length of anterior cranial fontanel ( $8, 0 > 1$ ); fenestra delimited by lateral ethmoid and frontal very large ( $17, 1 > 2$ ); frontal mesial laminar projection absent ( $23, 1 > 0$ ); anterior portion of anterior cranial fontanel not delimited by dorsal expansion of orbitosphenoid ( $24, 1 > 0$ ); posterior cranial fontanel very wide and long ( $27, 1 > 3$ ); tooth plates associated with vomer present ( $55, 0 > 1$ ); lateral expansions of orbitosphenoid and pterospheneid absent ( $64, 1 > 0$ ); optic foramen very reduced ( $67, 1 > 2$ ); ventral tip of subvertebral process spatulate ( $80, 2 > 3$ ); contact face for articulation of transcapular process with basioccipital large and depressed ( $85, 0 > 1$ ); transcapular process very short and thick ( $87, 2 > 1$ ); articulation of autopalatine with lateral ethmoid in middle of bone ( $111, 2 > 1$ ); premaxilla wide and moderately long, its length more than three times its width ( $120, 2 > 1$ ); dorsal crest of premaxilla beginning between lateral one-third or one-half of anterior margin ( $124, 0 > 1$ ); metapterygoid anterior process acute ( $138, 1 > 0$ ); dorsal crest of hyomandibula short and high ( $141, 0 > 1$ ); second basibranchial mushroom shaped ( $166, 0 > 1$ ); distal portion of uncinat process of third epibranchial truncate ( $183, 0 > 1$ ); Müllerian ramus bone blade inconspicuous ( $206, 2 > 0$ ); dorsal-fin spine prolonged into a

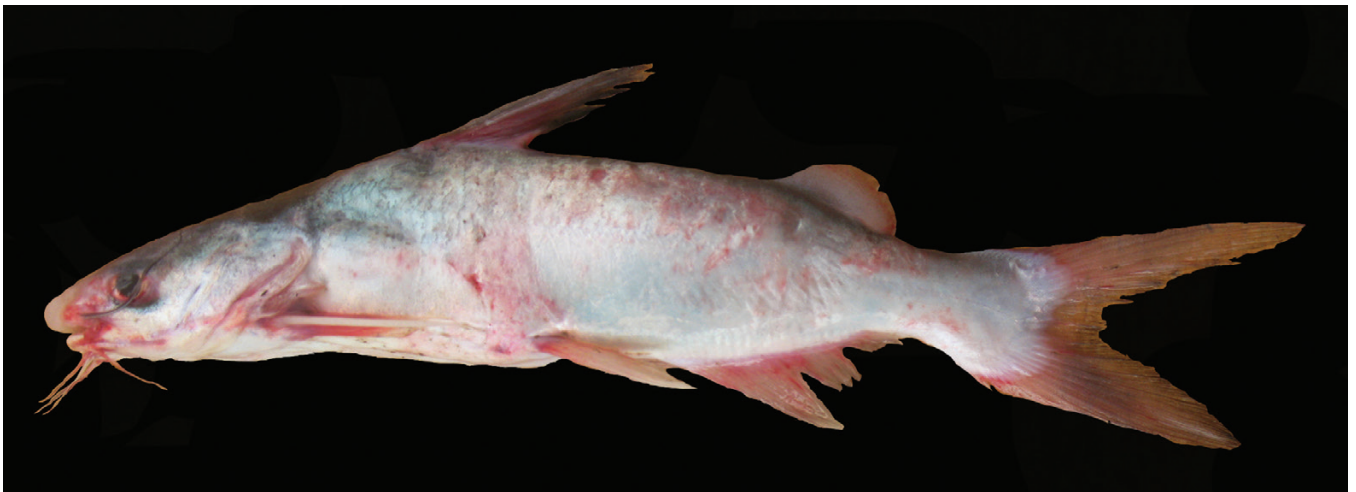

Figure 46. *Nedystoma dayi*, New Guinea, photograph by Ricardo Betancur-R., type species of the genus.

filament (221, 0 > 1); cleithrum lateral face very narrow (227, 0 > 1).

*Included species*

*Nemapteryx armiger* De Vis, 1884.

*Nemapteryx* aff. *armiger*.

*Habitat and distribution*: Brackish and marine waters, southern New Guinea and northern Australia (Fig. 38).

*Remarks*

The total-evidence analysis supports the morphological and molecular distinctiveness of *Nemapteryx* (Marceniuk and Menezes 2007, Marceniuk *et al.* 2012), with the addition of a currently unnamed species from New Guinea (Betancur-R. 2009).

*Neoarius* Castelnau, 1878

BI 0.74

(Figs 1–2, 48)

*Type species*: *Arius curtisii* Castelnau, 1878.

*Diagnosis*

Mesethmoid median portion moderately wide (2, 2 > 1); pterotic mesial border with parieto-supraoccipital longer than anterior border with sphenotic (36, 0 > 1); anterior process of first hypobranchial in middle of bone (174, 0 > 1).

*Ambiguous optimization*: Lateral horn of lateral ethmoid compressed and spatulate (11, 0 > 1); one-half or less of interopercle posterior part contacting ventral margin of opercle (131, 1 > 0); Müllerian ramus distal one-third markedly curved (208, 1 > 2).

*Included species*

*Neoarius berneyi* Whitley, 1941

*Neoarius graeffei* Kner & Steindachner, 1867

*Neoarius* aff. *graeffei* sp 1

*Neoarius* aff. *graeffei* sp 2

*Neoarius hainesi* Kailola, 2000

*Neoarius midgleyi* Kailola & Pierce, 1988

*Neoarius pectoralis* Kailola, 2000 \* *sedis mutabilis*.

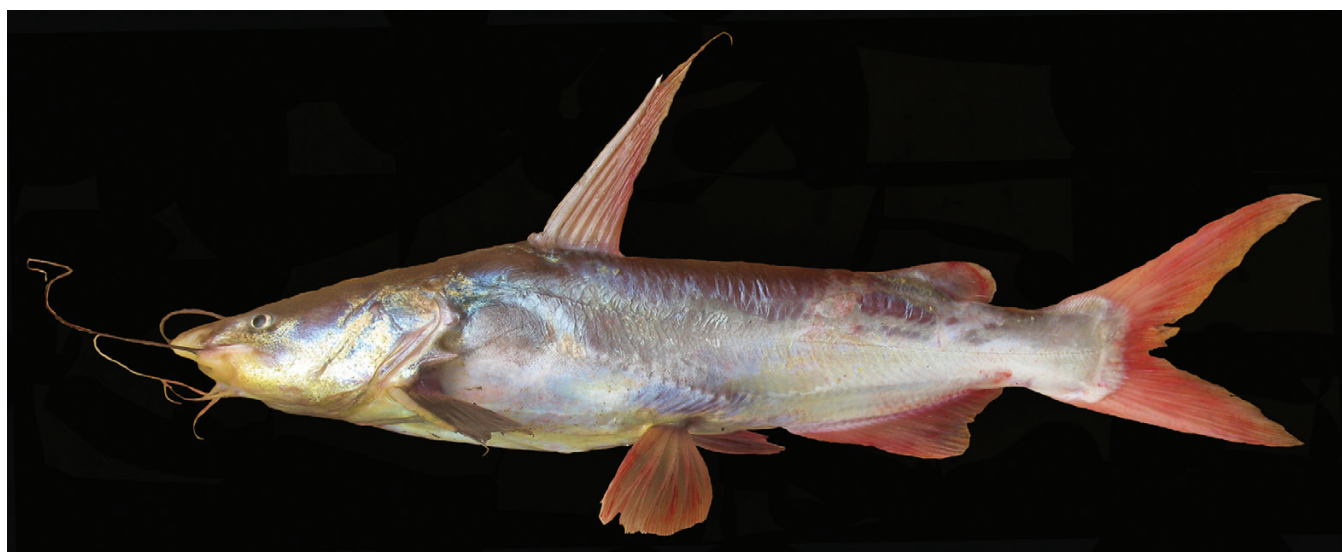

**Figure 47.** *Nemapteryx armiger* (senior synonym of *Arius stirlingi*), northern Australia and central-southern New Guinea, photograph by Ricardo Betancur-R., type species of the genus.

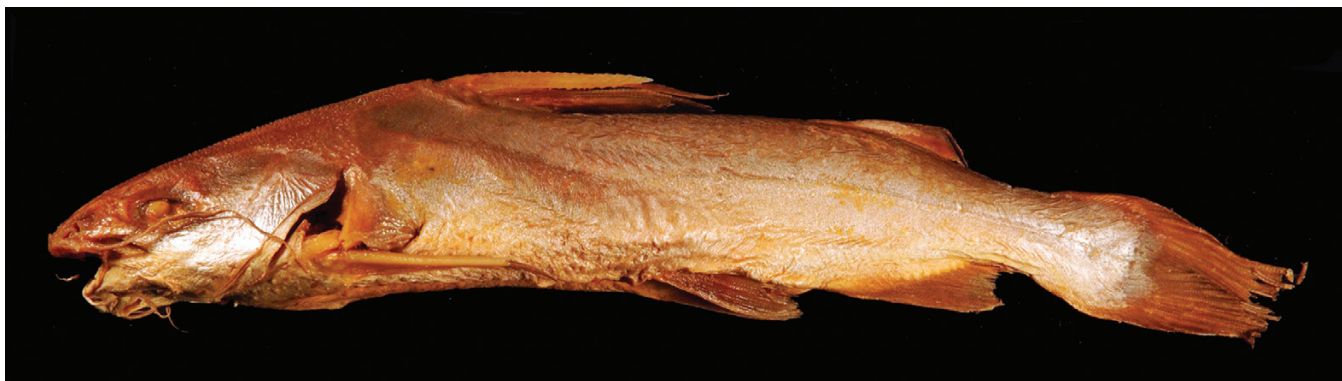

**Figure 48.** *Neoarius graeffei*, MNHN B-0693 (senior synonym of *Arius curtisii*), southern New Guinea and northern Australia, type species of the genus.

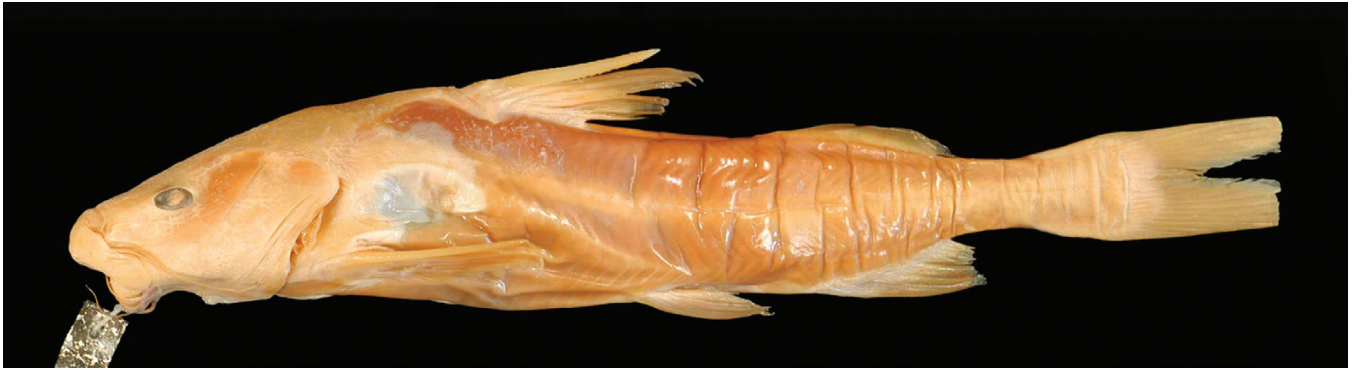

**Figure 49.** *Pachyula crassilabris*, AMS B 9961, New Guinea, type species of the genus.

**Habitat and distribution:** Fresh, brackish, and marine waters, southern New Guinea and Australia (Fig. 38).

#### Remarks

The MP and BI analyses support the monophyly of *Neoarius* in contrast to previous morphological studies, which treated the group as a synonym of *Ariopsis* (Kailola 2004) or as a valid genus (Marceniuk and Menezes 2007, Marceniuk *et al.* 2012). This study supports the inclusion of *Neoarius midgleyi* and two currently unnamed species into the genus (Betancur-R. 2009) and renders *Amissidens* (type species: *Arius hainesi* Kailola, 2000) into synonymy.

*Pachyula* Ogilby, 1898

(Figs 1–3, 38F, 49)

**Type species:** *Hemipimelodus crassilabris* Ramsay & Ogilby, 1886.

#### Diagnosis

Mesethmoid median portion very narrow (2, 2 > 0); epioccipital visible dorsally (41, 0 > 1); vomer anterior margin pronounced and acute (50, 0 > 1); basioccipital lateral process absent with anterior and posterior portions equally developed (83, 1 > 0); anteroventral portion of opercle subtrapezoidal, very short (127, 1 > 2); metapterygoid one and a one-half times longer than deep in perpendicular section (135, 1 > 2); posterolateral processes of urohyal short (160, 1 > 0); third basibranchial chalice shaped (168, 0 > 1); posterior margin of first epibranchial straight (181, 1 > 0); first pharyngobranchial large and depressed (190, 0 > 1); median crest associated with neural spine of fourth vertebra very high (202, 0 > 1); Müllerian ramus robust (207, 0 > 1); ventral surfaces of parapophyses of fifth and sixth vertebrae conspicuously concave (212, 0 > 1); adipose fin-base long (222, 2 > 1).

**Ambiguous optimization:** Mesethmoid medial notch narrow and deep (1, 0 > 1); lateral horn of lateral ethmoid compressed and spatulate (11, 0 > 1); Müllerian ramus distal one-third gently curved (208, 2 > 1); posterior process of cleithrum very long (224, 0 > 2).

#### Included species

*Pachyula crassilabris* Ramsay & Ogilby, 1886

*Pachyula conorhynchus* Weber, 1913 \* *sedis mutabilis*.

**Habitat and distribution:** Freshwater, southern New Guinea (Fig. 38).

#### Remarks

Total-evidence analysis confirms the validity of this genus, in agreement with previous morphological and molecular studies (Marceniuk and Menezes 2007, Betancur-R. 2009, Marceniuk *et al.* 2012).

#### *Paracinetodus* gen. nov.

(Figs 1–3, 38B, 50)

**ZooBank registration:** [urn:lsid:zoobank.org:act:01D775F1-CA33-42B6-AE05-AC1D3E9DBE6C](https://zoobank.org/act:01D775F1-CA33-42B6-AE05-AC1D3E9DBE6C).

**Type species:** *Arius carinatus* Weber, 1913.

#### Diagnosis

Lateral horn of lateral ethmoid compressed and spatulate (11, 0 > 1); extrascapular subtriangular (37, 1 > 2); epioccipital contacting small narrow area of diagonal crest associated with neural spine of fourth vertebra (44, 2 > 0); ventral tip of subvertebral process acute (80, 0 > 2); basioccipital lateral process absent with anterior and posterior portions equally developed (83, 1 > 0); transcapular process at right angle to body axis (86, 0 > 1); transcapular process short and thick (87, 0 > 2); space between transcapular process and otic capsule small (89, 1 > 2); premaxilla narrow and long, length two to three times its width (120, 1 > 2); bony blade connecting posterolateral processes of urohyal absent (159, 0 > 1); posterolateral processes of urohyal two-thirds as long as distal portion of bone (162, 0 > 2); transverse crest associated with neural spine of fourth vertebra high (200, 0 > 1); median crest associated with neural spine of fourth vertebra high (202, 0 > 1); Müllerian ramus bony blade evident in more than one-half length (206, 0 > 2); ventral surfaces of parapophyses of fifth and sixth vertebrae conspicuously concave (212, 0 > 1); seventh vertebra free from ventral superficial ossification (214, 0 > 1); posterior process of cleithrum very long (224, 1 > 2); second dorsal cleithral process dorsally directed and parallel to first dorsal process (226, 0 > 1).

#### Etymology

Derived from the Greek ‘para’ for ‘near’, highlighting its morphological similarity with the genus *Cinetodus*. Gender: masculine.

#### Included species

*Paracinetodus carinatus* Weber, 1913.

**Habitat and distribution:** Freshwater, southern New Guinea (Fig. 38).



*Remarks*

*Arius carinatus* was included in *Cinetodus* in previous morphological studies (Kailola 2004, Marceniuk and Menezes 2007, Marceniuk et al. 2012). The results of the total-evidence analysis place the species in a lineage distinct from that of *Cinetodus*, corroborating a previous molecular result (Betancur-R. 2009), and requiring the establishment of the new genus.

*Pararius* Whitley, 1940

BI 1, ML 75

(Figs 1–3, 38G and 51)

*Type species:* *Arius proximus* Ogilby, 1898.

*Diagnosis*

Lateral horn of lateral ethmoid variable in length and laterally oriented (12, 1 > 0); posterior cranial fontanel absent (26, 1 > 0); epiphyseal bar indistinct (28, 0 > 1); temporal fossa

very reduced (39, 1 > 0); accessory tooth plates small, oval to rounded (60, 0 > 1); lateral margins of orbitosphenoid progressively diverging anteriorly (63, 0 > 1); lateral and mesial portions of premaxilla of different sizes (121, 0 > 1).

*Included species*

*Pararius mastersi* Ogilby, 1898

*Pararius proximus* Ogilby, 1898.

*Habitat and distribution:* Brackish and marine waters, southern New Guinea and northern Australia (Fig. 38).

*Remarks*

The recognition of a close relationship between *Pararius proximus* and *Pararius mastersi* is a new result not found in previous studies (Kailola 2004, Marceniuk and Menezes 2007, Betancur-R. 2009, Marceniuk et al. 2012).

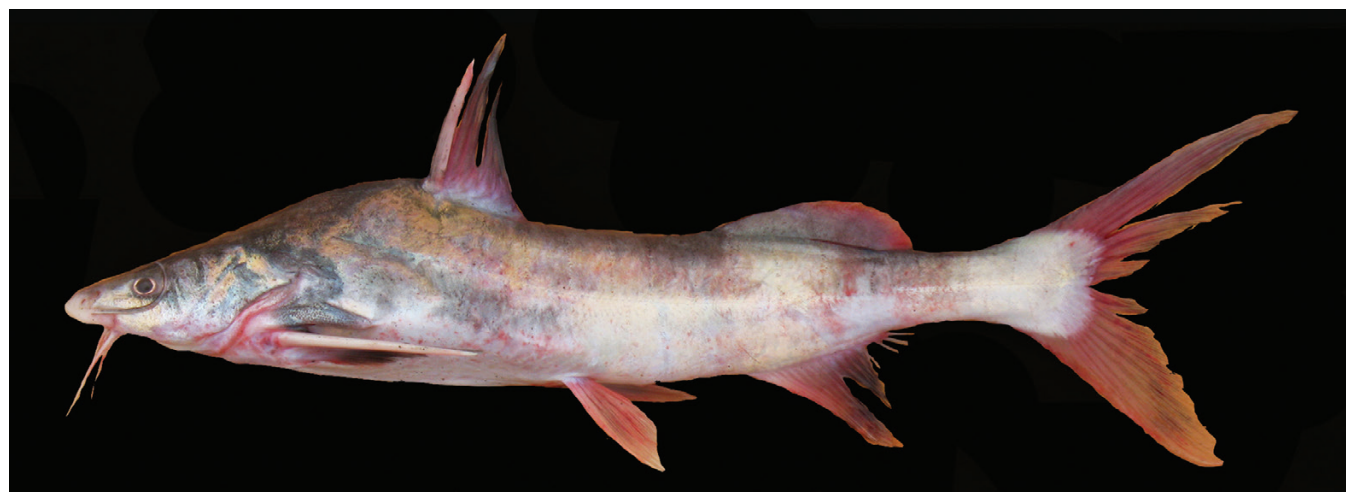

Figure 50. *Paracinetodus carinatus*, photograph by Ricardo Betancur-R., Papua New Guinea and northern Australia, type species of the genus.

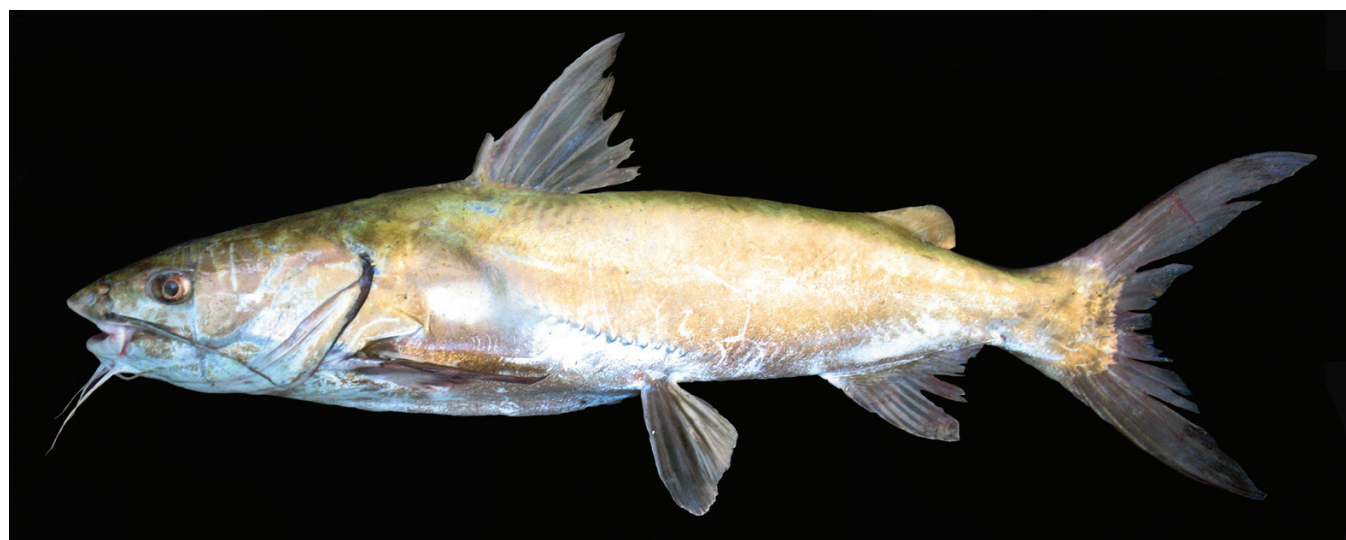

Figure 51. *Pararius proximus*, Papua New Guinea and Australia, photograph by Ricardo Betancur-R., type species of the genus.

*Papuarius* gen. nov.

(Figs 1–3, 52)

ZooBank registration: [urn:lsid:zoobank.org:act:AD2D552B-DF0E-46F1-B9CD-B712C9703F4](https://zoobank.org/urn:lsid:zoobank.org:act:AD2D552B-DF0E-46F1-B9CD-B712C9703F4).

Type species: *Arius latirostris* Macleay, 1883.

*Diagnosis*

Mesethmoid median portion moderately wide (2, 2 > 1); lateral ethmoid main component of bony bridge formed by lateral ethmoid and frontal (15, 1 > 0); frontal mesial laminar projection absent (23, 1 > 0); posterior cranial fontanel relatively narrow and long (27, 1 > 2); epiphyseal bar transversely elongate and longitudinally narrow (29, 0 > 1); medial groove of cranium absent (30, 0 > 1); anterior opening of aortic canal at base of subvertebral process and anteroventrally oriented (77, 0 > 1); contact face for articulation of transcapular process with basioccipital large and depressed (85, 0 > 1); dorsal crest of hyomandibula short and high (141, 0 > 1); contact face between first epibranchial and first pharyngobranchial conspicuous (177, 0 > 1); distal portion of uncinat process of third epibranchial acute (183, 1 > 0).

*Ambiguous optimization:* Lateral horn of lateral ethmoid compressed and spatulate (11, 0 > 1); posterolateral processes of urohyal lateroposteriorly oriented, forming angle greater than 70° (161, 1 > 0).

*Etymology*

The first part of the generic name comes from Papua, a common element of the names of the six Indonesian provinces as well as the independent country that together compose the island group called New Guinea. The second part is from the frequently used ariid generic name *Arius*. Gender: masculine.

*Included species*

*Papuarius latirostris* Macleay, 1883.

*Habitat and distribution:* Freshwater, southern New Guinea (Fig. 38).

*Remarks*

The genus *Papuarius* is established to accommodate *Papuarius latirostris*, a species that has been assigned to a number of

different genera over time. In this study it is likewise assigned to different places within the Ariina, but without a clear association to any single genus.

*Potamosilurus* Marceniuk & Menezes, 2007

MP 99, BI 1, ML 99

(Figs 1–3, 38H and 53)

Type species: *Hemipimelodus macrorhynchus* Weber, 1913.

*Diagnosis*

Lateral ethmoid as main component of bony bridge formed by lateral ethmoid and frontal (15, 1 > 0); accessory tooth plates absent (58, 1 > 0); contact face for articulation of transcapular process with basioccipital large and depressed (85, 0 > 1).

*Ambiguous optimization:* Mesethmoid medial notch indistinct, obscured by bone deposition (1, 1 > 2); mesethmoid median portion moderately wide (2, 2 > 1); dorsal crest of hyomandibula short and high (141, 0 > 1); adipose-fin base moderately long (222, 1 > 2).

*Included species*

*Potamosilurus coatesi* Kailola, 1990

*Potamosilurus macrorhynchus* Weber, 1913

*Potamosilurus robertsi* Kailola, 1990 \* *sedis mutabilis*

*Potamosilurus velutinus* Weber, 1907.

*Habitat and distribution:* Freshwater, southern New Guinea (Fig. 38).

*Remarks*

*Potamosilurus* is recognized as a valid genus, as defined by Marceniuk and Menezes (2007) excluding *Papuarius latirostris*, which is assigned to a new genus based on the results of the total-evidence analysis.

## CONCLUSIONS

Some recent studies of the phylogenetic relationships of various zoological groups suggested that the best approach to establishing a stable taxonomy is to combine as many types of evidence as possible to obtain the most complete picture

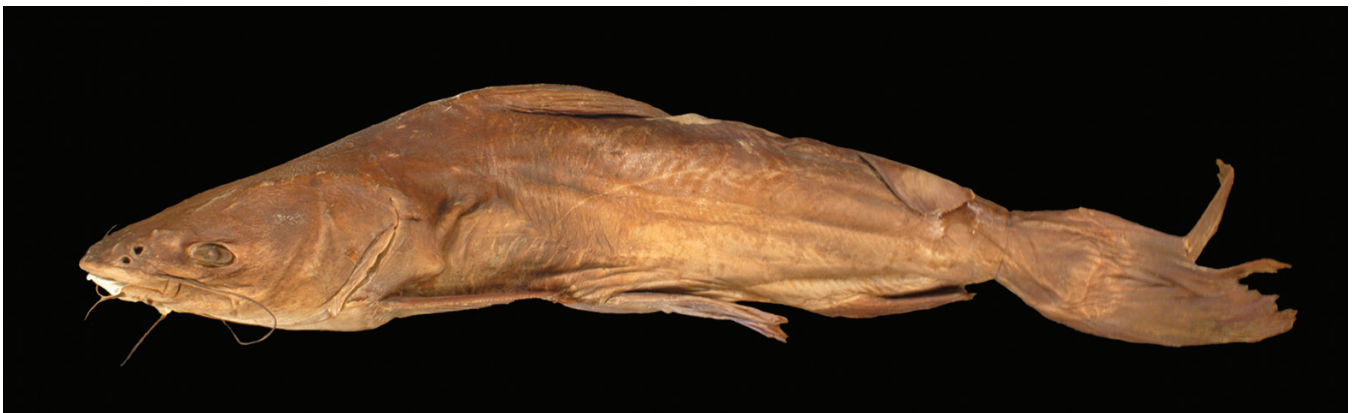

Figure 52. *Papuarius latirostris*, AMS I 9072, New Guinea, type species of the genus.

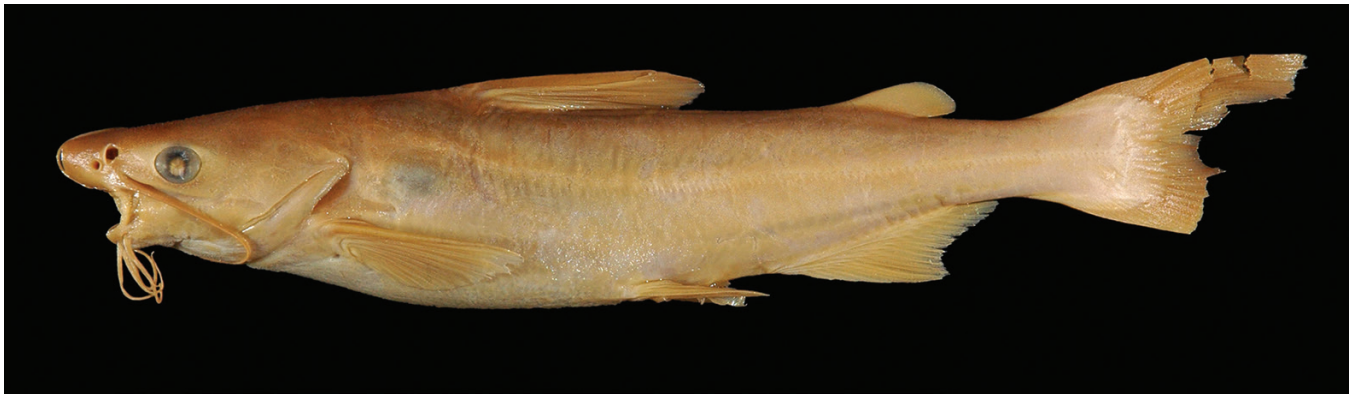

Figure 53. *Potamosilurus macrorhynchus*, ZMA 111086, New Guinea, type species of the genus.

of their evolutionary history (de Queiroz and Gatesy 2007, Lopardo *et al.* 2010, Assis *et al.* 2011). ‘Total evidence’ or ‘pooled evidence’ based phylogenetic analyses have been employed to resolve incongruities between independent morphological and molecular analyses in different animal groups (Giribet *et al.* 2001, Nylander *et al.* 2004, Bond and Hedin 2006, Sanders *et al.* 2006). Conflicts between molecular and morphological analyses and taxonomic problems within the Ariidae have been clarified in the present study. For example, the monophyly and composition of the genus *Notarius* Gill, 1863 was revised with the recognition of the synonymy of *Amphiarius* proposed based on morphological data (Marceniuk and Menezes 2007), while the genus *Aspistor*, with an uncertain position in previous molecular analyses (Betancur-R. *et al.* 2007, Betancur-R. 2009), was supported as a monophyletic genus sister to *Notarius*. The relationship of species restricted to freshwaters in the New World was also revised, with the redefinition of the genus *Potamarius* (*sensu* Marceniuk and Menezes 2007), composed of species found in the Usumacinta River Basin and Lake Izabal in Mexico and Guatemala. This result confirms the recognition of two other restricted freshwater genera, *Paragenidens* and *Chinchaysuyoa*, the first restricted to coastal drainages of south-eastern Brazil (western Atlantic) and the second restricted to coastal drainages of Ecuador and Peru (eastern Pacific).

The monophyly of the genera *Brustiarius*, *Cochlefelis*, *Neoarius*, and *Potamosilurus* (*sensu* Marceniuk and Menezes 2007) restricted to Papua New Guinea and Australia, was revised, with a redefinition of the species composition of these genera. The recognition of suprageneric taxa (tribes and subtribes) for New World and Old World genera, as well as distinct groups from Asia and Oceania, reflect vicariant events as noted by Betancur-R. (2009).

The total-evidence approach led to the recognition of morphological convergences in taxa with similar ecologies, found in different geographic areas that were previously thought to be phylogenetically closely related. These results support the revalidation of synonymized genera (e. g., *Hexanematichthys*) or description of a new genus (*Pseudosciades*, see Figs 24D, E) that is similar in appearance to *Sciades* (Fig. 16C), and occupy similar habitats (estuarine and marine waters). *Hemipimelodus* is also morphologically similar to *Cephalocassis* (Fig. 24B), as are *Paracinetodus* and *Cinetodus* (Fig. 38B), all restricted to freshwater habitats.

Our total-evidence analysis confirms the recognition of the subfamily Bagreinae (which includes the genus *Bagre*, sister group to all Ariidae except *Galeichthys*), previously supported only by morphological data (Marceniuk *et al.* 2012). The decision to propose new generic names was done to preserve, as much as possible, the already proposed description of several genera and to keep only monophyletic genera (Figs 1–3).

In summary, the results of the total-evidence analysis clarified taxonomic incongruences between morphological and molecular phylogenetic analyses, producing a consensus classification which improves our knowledge of the systematics and the evolution of the Ariidae and morphologically based diagnoses of all of the named taxa.

## SUPPORTING INFORMATION

Supplementary data is available at *Zoological Journal of the Linnean Society* Journal online.

## ACKNOWLEDGEMENTS

The authors are grateful for the contribution made by Dr Ricardo Betancur-R in phases of the development of the present study, as well as the availability of many of the data that were analysed here. Special thanks are due to Roberto E. Reis for reviewing the manuscript. A.P.M. is grateful for the postdoctoral fellowship from the Conselho Nacional de Desenvolvimento Científico e Tecnológico (CNPq, Proc. 118452/2017–7) and the postdoctoral fellowship at Universidade Federal da Paraíba (FAPESQ, Proc. 1262/2021), C.O. received financial support from Fundação de Amparo à Pesquisa do Estado de São Paulo (FAPESP grants 2020/13433–6, 2018/20610–1, 2016/09204–6, 2014/26508–3) and Conselho Nacional de Desenvolvimento Científico e Tecnológico (CNPq proc. 306054/2006–0).

## REFERENCES

- Acero PA, Betancur-R R. Monophyly, affinities, and subfamilial clades of sea catfishes (Siluriformes: Ariidae). *Ichthyological Exploration of Freshwaters* 2007;18:133–43.
- Assis LCS, de Carvalho MR, Wheeler QD. Homoplasy: from detecting pattern to determining process in evolution, but with a second role for morphology? *Zootaxa* 2011;2984:67–8.
- Berg LS. Classification of fishes both recent and fossil. *Travaux de l'Institut Zoologique de l'Academie des Sciences de l'URSS* 1940;5:87–517.



- Betancur-R R. Molecular phylogenetics and evolutionary history of ariid catfishes revisited: a comprehensive sampling. *BMC Evolutionary Biology* 2009;**9**:175. <https://doi.org/10.1186/1471-2148-9-175>
- Betancur-R R, Acero PA. Description of *Notarius biffi* n. sp. and redescription of *N. insculptus* (Jordan and Gilbert) (Siluriformes: Ariidae) from the eastern Pacific, with evidence of monophyly and limits of *Notarius*. *Zootaxa* 2004;**703**:1–20.
- Betancur-R R, Acero PA, Bermingham E *et al.* Systematics and biogeography of New World sea catfishes (Siluriformes: Ariidae) as inferred from mitochondrial, nuclear, and morphological evidence. *Molecular Phylogenetics and Evolution* 2007;**45**:339–57. <https://doi.org/10.1016/j.ympev.2007.02.022>
- Betancur-R R, Acero PA, Duque-Caro H *et al.* Phylogenetic and morphological analyses of a coastal fish reveal a marine biogeographic break of terrestrial origin in the southern Caribbean. *PLoS One* 2010;**5**:e11566. <https://doi.org/10.1371/journal.pone.0011566>
- Betancur-R R, Armbruster JW. Molecular clocks provide new insights into the evolutionary history of Galeichthyine sea catfishes. *Evolution* 2009;**63**:1232–43.
- Bleeker P. De Visschen van den Indischen Archipel. Beschreven en toegelicht. Siluri. *Acta Societatis Regiae Scientiarum Indo-Neerlandicae* 1858;**4**:1–370.
- Bleeker P. *Atlas ichthyologique des Indes Orientales Néerlandaises, publié sous les auspices du Gouvernement colonial néerlandais. Tome II. Siluroïdes, Chacoides et Hétérobranchoides.* Amsterdam, 1862.
- Britto MR. *Análise filogenética da ordem Siluriformes com ênfase nas relações da superfamília Loricarioidea (Teleostei: Ostariophysi).* Unpublished D. Phil. Thesis, Universidade de São Paulo, São Paulo, 2002.
- Bond JE, Hedin M. A total evidence assessment of the phylogeny of North American euctenizine trapdoor spiders (Araneae, Mygalomorphae, Cyrtachenidiidae) using Bayesian inference. *Molecular Phylogenetics and Evolution* 2006;**41**:70–85.
- Chardon M. Anatomie comparée de l'appareil de Weber et structures connexes chez les Siluriformes. *Annales Du Musée Royal De l'Afrique Centrale, Series in 8°, Sciences Zoologiques* 1968;**169**:1–277.
- De Queiroz A, Gatesy J. The supermatrix approach to systematics. *Trends in Ecology and Evolution* 2007;**22**:34–41.
- Eigenmann CH, Eigenmann RS. A revision of the South American Nematognathi or cat-fishes. *Occasional Papers of the California Academy of Sciences* 1890;**1**:1–507.
- Felsenstein J. Confidence limits on phylogenies: an approach using the bootstrap. *Evolution* 1985;**39**:783–91. <https://doi.org/10.1111/j.1558-5646.1985.tb00420.x>
- Ferraris CJ. Checklist of catfishes, recent and fossil (Osteichthyes: Siluriformes), and catalogue of siluriform primary types. *Zootaxa* 2007;**1418**:1–628.
- Fink SV, Fink WL. Interrelationships of the ostariophysian fishes (Teleostei). *Zoological Journal of the Linnean Society* 1981;**72**:297–353.
- Giribet G, Edgecombe GD, Wheeler WC. Arthropod phylogeny based on eight molecular loci and morphology. *Nature* 2001;**413**:157–61.
- Greenwood PH, Rosen DE, Weitzman SH *et al.* Phyletic studies of teleostean fishes, with a provisional classification of living forms. *Bulletin of the American Museum of Natural History* 1966;**131**:339–455.
- Goloboff PA, Farris J, Nixon K. TNT, a free program for phylogenetic analysis. *Cladistics* 2008;**24**:774–86.
- Günther A. *Catalogue of Fishes in the British Museum, vol. 5.—Catalogue of the Physostomi, Containing the Families Siluridae, Characinidae, Haplochromidae, Sternopygidae, Scopelidae, Stomiidae in the Collection of the British Museum.* London: Trustees of the British Museum (Natural History), 1864, xxii + 455 p.
- Hardman M. *The phylogenetic relationships among extant catfishes, with special reference to Ictaluridae (Otophysi: Siluriformes).* Unpublished D. Phil. Thesis, Illinois: University of Illinois at Urbana-Champaign, 2002.
- Hardman M. The phylogenetic relationships among nondiplomystid catfishes as inferred from mitochondrial cytochrome *b* sequences; the search for the ictalurid sister taxon (Otophysi: Siluriformes). *Molecular Phylogenetics and Evolution* 2005;**37**:700–20. <https://doi.org/10.1016/j.ympev.2005.04.029>
- Hauser DL, Presch W. The effect of ordered characters on phylogenetic reconstruction. *Cladistics* 1991;**7**:243–265.
- Herre AWCT. A summary of the Philippine catfishes, Order Nematognathi. *Philippine Journal of Science* 1926;**31**:385–413.
- Jayaram KC, Dhanze JR. Siluroid fishes of India, Burma, and Ceylon: 21. – A note on the systematic position of *Tachysurus serratus* (Day) (Ariidae). *Bulletin of the Zoological Survey of India* 1978;**1**:203–5.
- Jordan DS, Evermann BW. The fishes of North and Middle America: a descriptive catalogue of the species of fish-like vertebrates found in the waters of North America, north of the Isthmus of Panama; part 1. *Bulletin of the United States National Museum* 1896;**47**:1–1240.
- Jordan DS, Evermann BW. The fishes of North and Middle America: a descriptive catalogue of the species of fish-like vertebrates found in the waters of North America, north of the Isthmus of Panama; part 3. *Bulletin of the United States National Museum* 1898;**47**:2183a–3136.
- Kailola PJ, Bussing WA. Ariidae (frecuentemente ‘Tachysuridae’ en la literatura). In: Fischer W, Krupp F, Schneider W, Sommer C, Carpenter KE, Niem VH (eds), *Guía FAO para la Identificación de Especies para los Fines de la Pesca. Pacific Centro-Oriental. Volumen II. Vertebrados – parte I.* Rome: Food and Agriculture Organisation, 1995, 860–886.
- Kailola PJ. A phylogenetic exploration of the catfish family Ariidae (Otophysi: Siluriformes). *The Beagle, Records of Museum Art Galleries of North Territory* 2004;**20**:87–166.
- Kumar S, Stecher G, Li M *et al.* MEGA X: molecular evolutionary genetics analysis across computing platforms. *Molecular Biology and Evolution* 2018;**35**:1547–9.
- Lopardo L, Giribet G, Hormiga G. Morphology to the rescue: molecular data and the signal of morphological characters in combined phylogenetic analyses – a case study from mysmenid spiders (Araneae, Mysmenidae), with comments on the evolution of web architecture. *Cladistics* 2010;**26**:1–52.
- Maddison W, Maddison D. *Mesquite 2. A Modular System for Evolutionary Analysis.* 2007. Available online at: <http://www.mesquiteproject.org>
- Marceniuk AP, Menezes NA. Systematics of the family Ariidae (Ostariophysi, Siluriformes), with a redefinition of the genera. *Zootaxa* 2007;**1416**:1–126.
- Marceniuk AP, Menezes NA, Britto MR. Phylogenetic analysis of the family Ariidae (Ostariophysi: Siluriformes), with a hypothesis on the monophyly and relationships of the genera. *Zoological Journal of the Linnean Society* 2012;**165**:534–669. <https://doi.org/10.1111/j.1096-3642.2012.00822.x>
- Marceniuk AP, Siccha-Ramirez R, Barthem RB *et al.* Redescription of *Notarius grandicassis* and *Notarius parmocassis* (Siluriformes; Ariidae), with insights into morphological plasticity and evidence of incipient speciation. *Systematics and Biodiversity* 2017a;**1**:1–16.
- Marceniuk AP, Acero PA, Cooke R *et al.* Taxonomic revision of the New World genus *Ariopsis* Gill (Siluriformes: Ariidae), with description of two new species. *Zootaxa* 2017b;**429**:1–42.
- Marceniuk AP, Bogorodsky SV, Mal AO *et al.* Redescription of the blacktip sea catfish *Plicofollis dussumieri* (Valenciennes) (Siluriformes: Ariidae), with a new record from the Red Sea and notes on the diversity and distribution of *Plicofollis* spp. *Marine Biodiversity* 2017c;**48**:1–12.
- Marceniuk AP, Burlamaqui TCT, Oliveira C *et al.* Incipient speciation, driven by distinct environmental conditions, in the marine catfishes of the genus *Aspistor* (Siluriformes, Ariidae), from the Atlantic coast of South America. *Journal of Zoological Systematics and Evolutionary Research* 2019a;**57**:1–18.
- Marceniuk AP, Marchena J, Oliveira C *et al.* *Chinchaysuyoa*, a new genus of the fish family Ariidae (Siluriformes), with a redescription of *Chinchaysuyoa labiata* from Ecuador and a new species description from Peru. *Zootaxa* 2019b;**4551**:361–78.
- Marceniuk AP, Ingenito LF, Lima FC *et al.* Systematics, biogeography and conservation of *Paragenidens grandoculis* n. gen. and n. comb. (Siluriformes; Ariidae), a critically endangered species from southeastern Brazil. *Zootaxa* 2019c;**4586**:425–44.
- Meek SE, Hildebrand SF. The marine fishes of Panama. Part I. *Field Museum of Natural History Publication, Zoology Series* 1923;**15**:1–330.

- Miller MA, Pfeiffer W, Schwartz T. Creating the CIPRES Science Gateway for inference of large phylogenetic trees. *Proceedings of the Gateway Computing Environments Workshop (GCE)*. 2010; **New Orleans**:1–8.
- Mo T. *Anatomy, Relationships and Systematics of the Bagridae (Teleostei: Siluroidei), with a Hypothesis of Siluroid Phylogeny*. *Theses Zoologicae* 17. Königstein: Koeltz Scientific Books. 1991.
- Nixon KC. *WinClada, version 1.00*. 08. Published by the author, Ithaca, NY, 2002.
- Nixon KC, Carpenter JM. On outgroups. *Cladistics* 1993; **9**:413–26. <https://doi.org/10.1111/j.1096-0031.1993.tb00234.x>
- Nixon KC, Davis JL. Polymorphic taxa, missing values and cladistic analysis. *Cladistics* 1991; **7**:233–41.
- Nylander JAA, Ronquist F, Huelsenbeck JP et al. Bayesian phylogenetic analysis of combined data. *Systematic Biology* 2004; **53**:47–67. <https://doi.org/10.1080/10635150490264699>
- de Pinna MC. Concepts and tests of homology in the cladistic paradigm. *Cladistics* 1991; **7**:367–94.
- de Pinna MCC. *Higher-level Phylogeny of Siluriformes (Teleostei, Ostariophysi), with a New Classification of the Order*. Ph.D. Thesis, City University of New York, 1993.
- Rambaut A, Suchard MA, Xie D, Drummond AJ. *Tracer v1.6*. 2014. Available at: <http://beast.bio.ed.ac.uk/Tracer>
- Regan CT. The classification of the teleostean fishes of the order Ostariophysi. 2. Siluroidea. *Annals and Magazine of Natural History* 1911; **8**:553–77.
- Rimmer MA, Merrick JR. A review of reproduction and development in the fork-tailed catfishes (Ariidae). *Proceedings of the Limnology Society* 1983; **107**:41–50.
- Roberts TR. An ichthyological survey of the Fly River in Papua New Guinea with descriptions of new species. *Smithsonian Contributions to Zoology* 1978; **281**:1–72.
- Ronquist F, Teslenko M, Van Der Mark P et al. MrBayes 3.2: efficient Bayesian phylogenetic inference and model choice across a large model space. *Systematic Biology* 2012; **61**:539–42.
- Sabaj MH. Codes for natural history collections in ichthyology and herpetology. *Copeia* 2020; **108**:593–669. <https://doi.org/10.1643/ASIHCONDONS2020>
- Sanders KL, Malhotra A, Thorpe RS. Combining molecular, morphological and ecological data to infer species boundaries in a cryptic tropical pitviper. *Biological Journal of the Linnean Society* 2006; **87**:343–64.
- Shelden FF. Osteology, myology, and probable evolution of the nematognath pelvic girdle. *Annals of the New York Academy of Sciences* 1937; **37**:1–95.
- Stamatakis A. RAxML-VI-HPC: Maximum likelihood based phylogenetic analyses with thousands of taxa and mixed models. *Bioinformatics* 2006; **22**:2688–90. <https://doi.org/10.1093/bioinformatics/btl446>
- Sullivan JP, Lundberg JG, Hardman M. A phylogenetic analysis of the major groups of catfishes (Teleostei: Siluriformes) using *rag1* and *rag2* nuclear gene sequences. *Molecular Phylogenetics and Evolution* 2006; **41**:636–62. <https://doi.org/10.1016/j.ympev.2006.05.044>
- Swofford DL, Maddison WP. Reconstructing ancestral character states under Wagner parsimony. *Mathematical Biosciences* 1987; **87**:199–229. [https://doi.org/10.1016/0025-5564\(87\)90074-5](https://doi.org/10.1016/0025-5564(87)90074-5)
- Taylor WR. Family No. 59: Ariidae. In: Smith MM, Heemstra PC (eds), *Smiths' Sea Fishes*. Johannesburg: Macmillan, 1986, 211–213.
- Taylor WR, Menezes NA. Family Ariidae. In: Fischer W (ed.), *FAO Species Identification Sheets for Fishery Purposes. Western Central Atlantic (Fishing Area 31)*. Rome: FAO, 1978.
- Tilak R. The comparative morphology of the osteocranium and the Weberian apparatus of Tachysuridae (Pisces: Siluroidea). *Journal of Zoology, London* 1965; **146**:150–74.
- Weber M, de Beaufort LF. *The Fishes of the Indo-Australian Archipelago. II. Malacopterygii, Myctophyoidea, Ostariophysi: I Siluroidea*. Leiden: EJ Brill, 1913.
